# Supplementary material
Source: HighWire-hosted journal article supplement (doi:10.1101/rna.079633.123)
Supplement: Supplemental_Material.docx [file Supplemental_Material.docx]

**Znf598-mediated Rps10/eS10 ubiquitination contributes to the ribosome ubiquitination dynamics during zebrafish development**

**Ugajin et al.**

**Supplemental Materials**

Supplemental Figures S1-S6

Supplemental Figure legends S1-S6

Supplemental Tables S1-S4

**Figure S1. Exogenously overexpressed Rpl36-FLAG enables us to purify the assembled ribosomes. Related to Figure 1.**

(A-C) Validation of ribosome purification using exogenously overexpressed Rpl36-FLAG. Total lysates (input) and FLAG-immunoprecipitants (IP) in the presence (+) or absence (-) of Rpl36-FLAG overexpression were subjected to RNA electrophoresis (A), immunoblotting analysis using antibodies against the indicated proteins (B), and protein staining (C).

**Figure S2. The *rpl36*-FLAG strain enables us to purify the ribosome complex engaging in translation. Related to Figure 1.**

(A-B) Heat map showing ribosomal proteins (A) or a part of the copurified proteins (B) identified by the mass spectrometry analysis. The log10 scale is used to display the mean signal intensity of two biological replicates. The developmental time points are indicated below as hours post-fertilization (hpf). (C) Analysis of the copurified proteins detected by mass spectrometry analysis in (B). Total lysates (input) and FLAG-immunoprecipitants (IP) obtained from wild-type (WT) and *rpl36*-FLAG embryos at 24 hpf were subjected to immunoblotting analysis using antibodies against the indicated proteins (upper) and protein staining (lower).

**Figure S3. Ubiquitination signals detected in Figure 2A mainly derive from core ribosome 40S components. Related to Figure 2 and Figure 3.**

(A) Comparison of protein interactions with ribosomes under normal (150 mM NaCl) and high salt (400 mM NaCl) wash conditions. Total lysate (input) and FLAG-immunoprecipitants (IP) were subjected to immunoblotting analysis using antibodies against the indicated proteins. Salt concentrations are indicated above. (B) Comparison of ribosome ubiquitination levels under normal (150 mM NaCl) and high salt (400 mM NaCl) wash conditions. FLAG-immunoprecipitants in (A) were subjected to immunoblotting analysis with an anti-Ubiquitin antibody (left) and protein staining (right). Salt concentrations are indicated above. (C) Comparison of ribosome ubiquitination levels with or without EDTA incubation after purification. FLAG-immunoprecipitants obtained from EDTA-free conditions were incubated with or without EDTA and subjected to immunoblotting analysis with an anti-Ubiquitin antibody (left) and protein staining (right).

**Figure S4. Znf598 ubiquitinates K139 and K140 in Rps10/eS10. Related to Figure 4.**

(A-B) Detection of Rps10-HA ubiquitination. Total lysates were subjected to immunoblotting analysis of Znf598-Myc and Tubulin (A). FLAG-immunoprecipitants were subjected to immunoblotting analysis with an anti-HA antibody (B, left) and protein staining (B, right). White and black arrowheads indicate non-ubiquitinated or ubiquitinated Rps10-HA signals, respectively. (C) Validation of Rps10/eS10 ubiquitination sites. FLAG-immunoprecipitants were subjected to immunoblotting analysis with an anti-HA antibody (left) and protein staining (right). White and black arrowheads indicate non-ubiquitinated or ubiquitinated Rps10-HA signals, respectively.

**Figure S5. Rps20/uS10, Rps3/uS3, and Rps2/uS5 ubiquitination depend on Rps10/eS10 ubiquitination. Related to Figure 5.**

(A-C) Comparison of Rps20-HA (A), Rps3-HA (B), and Rps2-HA (C) ubiquitination levels in *rpl36*-FLAG and *rps10* K139/140R; *rpl36*-FLAG embryos. FLAG-immunoprecipitants were subjected to immunoblotting analysis with an anti-HA antibody (left and middle) and protein staining (right). White and black arrowheads indicate non-ubiquitinated or ubiquitinated signals, respectively.

**Figure S6. Rps10/eS10 ubiquitination is a prerequisite for multiple ubiquitination events promoted by Znf598. Related to Figure 5.**

(A) Comparison of ribosome ubiquitination levels under Znf598 overexpression in *rpl36*-FLAG and *rps10* K139/140R; *rpl36*-FLAG embryos. FLAG-immunoprecipitants in Figure 5C were subjected to immunoblotting analysis with an anti-Ubiquitin antibody. Black arrowheads indicate putative ubiquitinated Rps10/eS10 signals. White arrowheads indicate reduced ubiquitination signals in *rps10* K139/140R; *rpl36*-FLAG embryos. (B-C) Comparison of ribosome ubiquitination levels under harringtonine (HTN) (B) and cycloheximide (CHX) (C) treatment in *rpl36*-FLAG, *rps10* K139/140R; *rpl36*-FLAG, and MZ*znf598*; *rpl36*-FLAG embryos. FLAG-immunoprecipitants were subjected to immunoblotting analysis with an anti-Ubiquitin antibody (left) and protein staining (right). Concentrations of drugs are indicated above. (D-E) Comparison of ribosome ubiquitination levels under eRF1-AAQ overexpressed conditions in *rpl36*-FLAG, *rps10* K139/140R; *rpl36*-FLAG, and MZ*znf598*; *rpl36*-FLAG embryos. Total lysates were subjected to immunoblotting analysis of eRF1-HA and Tubulin (D). FLAG-immunoprecipitants were subjected to immunoblotting analysis with an anti-Ubiquitin antibody (E, left) and protein staining (E, right).
