# Supplementary material
Source: HighWire-hosted journal article supplement (doi:10.1101/rna.079633.123)
Supplement: Supplemental_Table_S1.xlsx [file Supplemental_Table_S1.xlsx]

## Sheet: Sheet1
Supplemental Table S1. List of peptides detected in mass spectrometry analysis of the FLAG-immunoprecipitant
Protein IDs	Peptide counts (all)	Protein names	Gene names	Fasta headers	Sequence coverage [%]	Mol. weight [kDa]	Sequence lengths	Intensity 0h_rep1	Intensity 0h_rep2	Intensity 6h_rep1	Intensity 6h_rep2	Intensity 12h_rep1	Intensity 12h_rep2	Intensity 24h_rep1	Intensity 24h_rep2
A0A0B4J1A6;Q08CK7	3;3	Insulin-like growth factor 2 mRNA-binding protein 1	igf2bp1	tr|A0A0B4J1A6|A0A0B4J1A6_DANRE IGF-II mRNA-binding protein 1 OS=Danio rerio OX=7955 GN=igf2bp1 PE=1 SV=1;sp|Q08CK7|IF2B1_DANRE Insulin-like growth factor 2 mRNA-binding protein 1 OS=Danio rerio OX=7955 GN=igf2bp1 PE=1 SV=1	6.5	65.589	598;598	0	0	40149	57494	770710	814570	1121300	576060
A0A0R4IRW9;A0A0E3D6N5;A0A0R4IM40;A0A0J9YJK4;A0A0R4IF39	1;1;1;1;1		mcm7	tr|A0A0R4IRW9|A0A0R4IRW9_DANRE Minichromosome maintenance complex component 7 (Fragment) OS=Danio rerio OX=7955 GN=mcm7 PE=1 SV=1;tr|A0A0E3D6N5|A0A0E3D6N5_DANRE DNA replication licensing factor MCM7 (Fragment) OS=Danio rerio OX=7955 GN=mcm7 PE=1 SV=3;tr|A0	14.7	8.7021	75;104;130;397;608	3753200	4759200	2188800	3509400	2184300	2322100	3730900	7027200
A0A0G2KX20;A0A0H2UJC5;X1WG05;H0WEL7;A0A0R4IEV0;A0A0G2KYH8;E7F8Q1;E9QHF8;F1QRJ7;H0WE81;E7F1G0;H0WF49;F1R2M3;A0A0R4IDX8;A0A0N4STY5;A8KBM3;F1QIY2;E7EY84;H0WF99;U3JA50;A0A0R4I9J7;A0A0R4IGT5;H0WFB4;A0A0R4IBW2;H0WE99;A0A0R4IHP5;A0A0R4IMZ3;H0WER4;A0A0G2L7B1;A8KBM4;F1QPF6;H0WF31;A0A2R8Q568;A0A0G2KLW9;E7F7Z6;E9QEP0;H0WEE1;A0A2R9YJP2;H0WE77;A0A286YB15;H0WF55;K7DY25;A0A2R8QEU7;A0A0H2UK28;E9QEN1;K7DYJ1;A0A0G…	4;4;4;2;2;2;2;2;2;2;2;2;2;2;2;1;1;1;1;1;1;1;1;1;1;1;1;1;1;1;1;1;1;1;1;1;1;1;1;1;1;1;1;1;1;1;1;1;1;1;1;1;1;1;1;1;1;1;1;1;1;1;1;1;1;1;1;1;1;1;1;1;1;1;1;1;1		si:ch211-245n8.3;si:dkey-29j8.5;si:dkeyp-44b5.5;si:dkey-256i11.2;si:dkey-199m13.4;si:ch211-162i8.2;si:dkey-156k2.6;si:dkeyp-53e4.1	tr|A0A0G2KX20|A0A0G2KX20_DANRE Si:dkeyp-35e5.10 OS=Danio rerio OX=7955 GN=si:dkeyp-35e5.10 PE=4 SV=2;tr|A0A0H2UJC5|A0A0H2UJC5_DANRE Zinc finger protein 1146 OS=Danio rerio OX=7955 GN=znf1146 PE=4 SV=3;tr|X1WG05|X1WG05_DANRE Zgc:174704 OS=Danio rerio OX=795	15.1	38.128	331;331;331;361;327;331;382;382;382;382;440;382;440;382;383;383;390;383;64;383;383;382;406;394;419;410;410;415;362;419;420;420;428;434;434;436;438;438;440;440;362;361;362;200;358;358;356;355;354;331;329;358;323;320;312;260;209;208;358;358;361;359;359;329;359;359;359;359;359;358;359;359;359;359;358;358;443	0	0	694580	177580	357400	400030	179430	1066000
A0A0G2KZ18	1			tr|A0A0G2KZ18|A0A0G2KZ18_DANRE Microtubule-associated protein OS=Danio rerio OX=7955 GN=LOC100001114 PE=1 SV=2	0.6	129.66	1216	0	0	0	0	0	0	0	0
A0A0G2L009	5			tr|A0A0G2L009|A0A0G2L009_DANRE Dynein, cytoplasmic 1, heavy chain 1 OS=Danio rerio OX=7955 GN=dync1h1 PE=1 SV=1	3.1	203.79	1765	2805600	961380	57189	40555	275100	411640	272300	432560
A0A0R4ICD6;Q32PQ2;A0A0G2L5W0;Q804H0	1;1;1;1	Annexin	anxa1c	tr|A0A0R4ICD6|A0A0R4ICD6_DANRE Annexin OS=Danio rerio OX=7955 GN=anxa1c PE=1 SV=1;tr|Q32PQ2|Q32PQ2_DANRE Annexin OS=Danio rerio OX=7955 GN=anxa1c PE=1 SV=1;tr|A0A0G2L5W0|A0A0G2L5W0_DANRE Annexin OS=Danio rerio OX=7955 GN=anxa1d PE=1 SV=2;tr|Q804H0|Q804H0_D	4.5	27.336	246;284;340;341	2939300	757510	0	0	0	0	0	0
A0A0G2L833	7			tr|A0A0G2L833|A0A0G2L833_DANRE Ly1 antibody reactive homolog (mouse) OS=Danio rerio OX=7955 GN=lyar PE=1 SV=2	34.6	28.443	243	184050	2008400	3046200	2961300	23961000	21028000	40592000	50576000
A0A140LFY0;A0A2R8QHX0;A0A2R8QLL7;A0A0G2L836	6;6;6;6			tr|A0A140LFY0|A0A140LFY0_DANRE Nidogen 1b OS=Danio rerio OX=7955 GN=nid1b PE=1 SV=1;tr|A0A2R8QHX0|A0A2R8QHX0_DANRE Nidogen 1b OS=Danio rerio OX=7955 GN=nid1b PE=1 SV=1;tr|A0A2R8QLL7|A0A2R8QLL7_DANRE Nidogen 1b OS=Danio rerio OX=7955 GN=nid1b PE=1 SV=1;tr|A	7.3	127.33	1157;1199;1200;1242	0	0	0	0	2402400	1865100	4975100	4486300
A0A0G2L8H4;K7DYM7;H0WES9;X1WCV7;K7DY34;H0WED8;X1WFA2;A0A2R8Q638;A0A0G2KGX6;A0A0G2L6P1;X1WEY0;H0WE64;R4GDQ3;E9QC08;E9QGT6;H0WF94;A0A0G2L8H6;F1R5V6;F1RD83;F1QY09;E7F0D9;A0A0R4IE88;A0A0J9YJE7;H0WFH3;E9QG34;A0A0G2KPH6;H0WE69;A9JT09;A0A0R4ICQ4;A0A0G2L9C4;E9QGV0	5;5;4;4;3;3;3;3;3;3;2;2;2;2;2;2;2;2;2;2;2;2;2;2;2;1;1;1;1;1;1		si:dkey-81i14.3;si:dkey-254e13.12;si:dkey-237m9.3;si:dkey-20l4.2;si:dkey-30f3.4;si:dkey-146c18.1	tr|A0A0G2L8H4|A0A0G2L8H4_DANRE Zinc finger protein 1043 OS=Danio rerio OX=7955 GN=znf1043 PE=4 SV=1;tr|K7DYM7|K7DYM7_DANRE Zinc finger protein 1042 OS=Danio rerio OX=7955 GN=znf1042 PE=4 SV=1;tr|H0WES9|H0WES9_DANRE Zinc finger protein 1044 (Fragment) OS=Da	10.9	54.702	476;435;218;418;448;420;332;420;420;420;504;392;448;420;420;420;392;384;363;362;362;325;309;273;260;397;205;363;325;320;70	0	0	2352800	4078200	2129500	2102600	1045800	955930
E9QES5;E7F912;A0A0H2UJM0;F1QE18;Q7T3D1	2;2;2;1;1	ERO1-like protein alpha	ero1l	tr|E9QES5|E9QES5_DANRE ERO1-like protein alpha OS=Danio rerio OX=7955 GN=ero1a PE=1 SV=1;tr|E7F912|E7F912_DANRE ERO1-like protein alpha OS=Danio rerio OX=7955 GN=ero1a PE=1 SV=2;tr|A0A0H2UJM0|A0A0H2UJM0_DANRE ERO1-like protein alpha OS=Danio rerio OX=7955	5	52.642	457;461;461;489;489	1717300	109530	0	0	0	0	0	0
E7F2K8;A0A0H2UKG9	1;1		CR847998.1	tr|E7F2K8|E7F2K8_DANRE Calmodulin-binding transcription activator 1b OS=Danio rerio OX=7955 GN=camta1b PE=3 SV=1;tr|A0A0H2UKG9|A0A0H2UKG9_DANRE Calmodulin-binding transcription activator 1b OS=Danio rerio OX=7955 GN=camta1b PE=3 SV=3	1.9	174.9	1626;1626	0	0	0	12227000	0	0	0	0
A0A0J9YIG5;Q90ZM2;Q90YL4	4;4;4	Protein transport protein Sec61 subunit alpha-like 1;Protein transport protein Sec61 subunit alpha-like 2	sec61al1;sec61al2	tr|A0A0J9YIG5|A0A0J9YIG5_DANRE SEC61 translocon subunit alpha 1,-like OS=Danio rerio OX=7955 GN=sec61a1l PE=1 SV=1;sp|Q90ZM2|S61A1_DANRE Protein transport protein Sec61 subunit alpha-like 1 OS=Danio rerio OX=7955 GN=sec61al1 PE=2 SV=3;sp|Q90YL4|S61A2_DANRE	8.6	52.381	476;476;476	390150	935010	1111500	269790	5024300	4781100	9225000	5425000
A0A0N4SUF2;F1Q7G3;Q1LXJ8;B0UYS0	8;8;6;2		cki	tr|A0A0N4SUF2|A0A0N4SUF2_DANRE Keratin 92 OS=Danio rerio OX=7955 GN=krt92 PE=1 SV=2;tr|F1Q7G3|F1Q7G3_DANRE Keratin 92 OS=Danio rerio OX=7955 GN=krt92 PE=1 SV=1;tr|Q1LXJ8|Q1LXJ8_DANRE Keratin 92 OS=Danio rerio OX=7955 GN=krt92 PE=1 SV=1	22.1	47.164	430;431;390;460	0	0	0	38079	694770	214880	439720	668830
A0A0R4IA64;A0A0R4IA30;A0A0R4IGB6;A0A0R4IK64;A0A0R4IS28;Q5SPD1;A0A2R8PVC9;Q5SPD0	1;1;1;1;1;1;1;1		eef1db	tr|A0A0R4IA64|A0A0R4IA64_DANRE Eukaryotic translation elongation factor 1 delta a (guanine nucleotide exchange protein) OS=Danio rerio OX=7955 GN=eef1da PE=1 SV=2;tr|A0A0R4IA30|A0A0R4IA30_DANRE Eukaryotic translation elongation factor 1 delta a (guanine nu	11	18.185	163;245;254;255;257;274;284;298	3018600	211720	99411	132690	261320	512060	582120	495970
A0A0R4IA80;A0A0R4ITA1;A0A0R4IZT6;F1QI59;A0A0R4IW89;Q6NSN6;Q7ZVR3	2;2;2;2;2;2;2	Serine/threonine-protein phosphatase	ppp1cb;ppp1caa;ppp1cab	tr|A0A0R4IA80|A0A0R4IA80_DANRE Serine/threonine-protein phosphatase OS=Danio rerio OX=7955 GN=ppp1cbl PE=3 SV=2;tr|A0A0R4ITA1|A0A0R4ITA1_DANRE Serine/threonine-protein phosphatase OS=Danio rerio OX=7955 GN=ppp1caa PE=1 SV=2;tr|A0A0R4IZT6|A0A0R4IZT6_DANRE S	10.4	26.425	231;284;323;327;327;331;332	1028800	345500	31847	0	52611	68911	176340	123880
A0A0R4IAQ1;Q6DRI1;Q1LUA8;E9QG06;F1R279;Z4YIU6;T1ECV8;F1QHS3	4;4;2;1;1;1;1;1	Eukaryotic translation initiation factor 3 subunit E-A;Eukaryotic translation initiation factor 3 subunit E-B	eif3ea;eif3eb	tr|A0A0R4IAQ1|A0A0R4IAQ1_DANRE Eukaryotic translation initiation factor 3 subunit E OS=Danio rerio OX=7955 GN=eif3eb PE=3 SV=2;sp|Q6DRI1|EI3EA_DANRE Eukaryotic translation initiation factor 3 subunit E-A OS=Danio rerio OX=7955 GN=eif3ea PE=2 SV=2;sp|Q1LUA8	11.5	51.014	433;446;446;109;157;401;439;446	1189100	1855500	2655700	1618000	3760000	3112500	2433200	1567200
A0A0R4IAU8;Q7SY48	1;1	HEAT repeat-containing protein 1	heatr1	tr|A0A0R4IAU8|A0A0R4IAU8_DANRE HEAT repeat-containing protein 1 OS=Danio rerio OX=7955 GN=heatr1 PE=1 SV=1;sp|Q7SY48|HEAT1_DANRE HEAT repeat-containing protein 1 OS=Danio rerio OX=7955 GN=heatr1 PE=2 SV=1	0.7	242.08	2159;2159	217650	286360	127540	162560	188800	180430	171070	223330
A0A0R4IB13	2			tr|A0A0R4IB13|A0A0R4IB13_DANRE X-ray repair cross-complementing protein 5 OS=Danio rerio OX=7955 GN=xrcc5 PE=1 SV=1	3.9	81.883	727	76246	0	338320	1159700	641800	129520	130050	0
A0A0R4IBJ2	3			tr|A0A0R4IBJ2|A0A0R4IBJ2_DANRE Brix domain-containing protein 2 OS=Danio rerio OX=7955 GN=bxdc2 PE=1 SV=1	10.7	44.014	383	1410300	1395100	1108500	1024600	2043900	1357400	3597200	4019100
F1QGN3;A0A0R4IC33;Q6P105;F1R0S9;Q6GQM6;Q1MT19;A0A2R8S0A2;A0A0R4IXJ1;F1QGR7;F1R133;A0A0R4IEW8	2;2;2;1;1;1;1;1;1;1;1	ELAV-like protein	elavl3;elavl2;elavl4	tr|F1QGN3|F1QGN3_DANRE ELAV-like protein OS=Danio rerio OX=7955 GN=elavl3 PE=1 SV=1;tr|A0A0R4IC33|A0A0R4IC33_DANRE ELAV-like protein OS=Danio rerio OX=7955 GN=elavl3 PE=1 SV=2;tr|Q6P105|Q6P105_DANRE ELAV-like protein OS=Danio rerio OX=7955 GN=elavl3 PE=1 S	8.1	37.681	345;358;359;176;360;388;389;395;403;408;411	0	0	0	0	0	0	811670	377030
A0A0R4ICL4	1			tr|A0A0R4ICL4|A0A0R4ICL4_DANRE Solute carrier organic anion transporter family member OS=Danio rerio OX=7955 GN=slco1e1 PE=3 SV=2	1.2	75.515	695	2544100	963140	195340	60481	69985	94941	100870	147310
A0A0R4ICV9;F1QYM4;A0A0R4IG09	1;1;1		eif4h	tr|A0A0R4ICV9|A0A0R4ICV9_DANRE Eukaryotic translation initiation factor 4H OS=Danio rerio OX=7955 GN=eif4h PE=1 SV=1;tr|F1QYM4|F1QYM4_DANRE Eukaryotic translation initiation factor 4H OS=Danio rerio OX=7955 GN=eif4h PE=1 SV=2;tr|A0A0R4IG09|A0A0R4IG09_DANRE	6.3	22.538	207;256;262	1307800	0	86432	0	66851	0	0	0
A2BHA7;K7DYA2;A2BHA8;A2BHA9;A2BHB0;A2BHB2;Q6P0K2;A0A0R4ID65;K7DY51;A2BHA6	3;3;3;3;3;3;3;3;2;2		srsf7a	tr|A2BHA7|A2BHA7_DANRE Serine and arginine-rich-splicing factor 7a (Fragment) OS=Danio rerio OX=7955 GN=srsf7a PE=1 SV=1;tr|K7DYA2|K7DYA2_DANRE Serine and arginine-rich-splicing factor 7a (Fragment) OS=Danio rerio OX=7955 GN=srsf7a PE=1 SV=1;tr|A2BHA8|A2BH	21	19.943	176;185;189;226;240;245;258;260;73;94	87610	299300	949260	525500	1537500	515600	1589300	2750400
A0A0R4IDJ0;A0A2U3TVQ4;Q6TV19	2;2;2	Endoribonuclease Dicer	dicer1	tr|A0A0R4IDJ0|A0A0R4IDJ0_DANRE Endoribonuclease Dicer OS=Danio rerio OX=7955 GN=dicer1 PE=1 SV=2;tr|A0A2U3TVQ4|A0A2U3TVQ4_DANRE Endoribonuclease Dicer OS=Danio rerio OX=7955 GN=dicer1 PE=1 SV=1;sp|Q6TV19|DICER_DANRE Endoribonuclease Dicer OS=Danio rerio OX	2	215.4	1905;1865;1865	150270	0	296960	0	701690	1015800	491400	276640
A0A0R4IDN1;A0A0R4IY30;B7ZDA6	4;2;1			tr|A0A0R4IDN1|A0A0R4IDN1_DANRE Laminin, beta 1a OS=Danio rerio OX=7955 GN=lamb1a PE=1 SV=2;tr|A0A0R4IY30|A0A0R4IY30_DANRE Laminin, beta 1a (Fragment) OS=Danio rerio OX=7955 GN=lamb1a PE=1 SV=1	2.5	197.1	1785;551;1782	0	0	0	0	1785600	1125100	1689000	2017400
A0A0R4IE10;A0A2R8Q469;Q6P969;Q568F0;E9QGR4;Q6DHT2;A0A2R8RKC7;A0A2R8PXT7;F1QQW9	7;6;5;5;4;3;3;1;1	Elongation factor 1-alpha	eef1a1a;eef1a1b	tr|A0A0R4IE10|A0A0R4IE10_DANRE Elongation factor 1-alpha OS=Danio rerio OX=7955 GN=eef1a1l2 PE=1 SV=2;tr|A0A2R8Q469|A0A2R8Q469_DANRE Elongation factor 1-alpha OS=Danio rerio OX=7955 GN=eef1a1l1 PE=1 SV=1;tr|Q6P969|Q6P969_DANRE Elongation factor 1-alpha OS=	17.3	50.133	462;462;462;462;207;463;463;80;483	64747000	27437000	10706000	16105000	15848000	19929000	12148000	14904000
A0A0R4IEI5;A0A2R8Q037	7;7			tr|A0A0R4IEI5|A0A0R4IEI5_DANRE Ribosome biogenesis protein NOP53 OS=Danio rerio OX=7955 GN=nop53 PE=1 SV=2;tr|A0A2R8Q037|A0A2R8Q037_DANRE Ribosome biogenesis protein NOP53 OS=Danio rerio OX=7955 GN=nop53 PE=1 SV=1	16	52.786	457;473	930550	1579700	717330	834720	6062800	8780800	8317400	10135000
A0A0R4IFL5	2			tr|A0A0R4IFL5|A0A0R4IFL5_DANRE 26S proteasome non-ATPase regulatory subunit 2 OS=Danio rerio OX=7955 PE=1 SV=2	4.9	59.313	547	7521400	10289000	7889200	4011600	5567000	6921300	6307600	5011300
E9QBF0;A0A2R8QNR8;A0A0R4IGG3;Q90XG0;Q1MTI4;I3IS66	2;2;2;2;2;1	Triosephosphate isomerase;Triosephosphate isomerase B;Triosephosphate isomerase A	tpi1b;tpi1a	tr|E9QBF0|E9QBF0_DANRE Triosephosphate isomerase (Fragment) OS=Danio rerio OX=7955 GN=tpi1b PE=1 SV=1;tr|A0A2R8QNR8|A0A2R8QNR8_DANRE Triosephosphate isomerase OS=Danio rerio OX=7955 GN=tpi1b PE=1 SV=1;tr|A0A0R4IGG3|A0A0R4IGG3_DANRE Triosephosphate isomeras	14.1	21.811	198;246;248;248;248;163	3367300	1199300	48858	47730	30114	30533	80430	40533
A0A0R4IGN3	1			tr|A0A0R4IGN3|A0A0R4IGN3_DANRE Protein disulfide-isomerase (Fragment) OS=Danio rerio OX=7955 GN=pdia3 PE=1 SV=1	2.4	51.135	459	1460700	523370	0	0	80263	66161	0	81683
Q7ZVT2;A0A0R4IGP6	4;4	Pyruvate kinase	pkma	tr|Q7ZVT2|Q7ZVT2_DANRE Pyruvate kinase OS=Danio rerio OX=7955 GN=pkma PE=1 SV=1;tr|A0A0R4IGP6|A0A0R4IGP6_DANRE Pyruvate kinase OS=Danio rerio OX=7955 GN=pkma PE=1 SV=1	11.3	58.057	532;532	20342000	3314000	459870	109500	289760	58779	60340	0
A0A0R4IH55;Q6DRL5	2;2	Myb-binding protein 1A-like protein	mybbp1a	tr|A0A0R4IH55|A0A0R4IH55_DANRE Myb-binding protein 1A-like protein OS=Danio rerio OX=7955 GN=mybbp1a PE=1 SV=1;sp|Q6DRL5|MBB1A_DANRE Myb-binding protein 1A-like protein OS=Danio rerio OX=7955 GN=mybbp1a PE=1 SV=1	2.8	143.39	1264;1269	158550	366660	144910	382380	493480	528290	687950	964890
Q6DG24;A0A2R8PYJ9;F1QLJ1;A0A0R4IZ80;A0A0R4IHL8;Q8JFE3;F1QKD5;E9QG65	1;1;1;1;1;1;1;1	Cellular tumor antigen p53	tp63	tr|Q6DG24|Q6DG24_DANRE Cellular tumor antigen p53 OS=Danio rerio OX=7955 GN=tp63 PE=1 SV=1;tr|A0A2R8PYJ9|A0A2R8PYJ9_DANRE Cellular tumor antigen p53 OS=Danio rerio OX=7955 GN=tp63 PE=1 SV=1;tr|F1QLJ1|F1QLJ1_DANRE Cellular tumor antigen p53 (Fragment) OS=Da	1.8	48.496	434;437;439;490;527;576;588;632	0	0	1337400	0	0	0	3810300	6740700
X1WE71;A0A0R4IHQ0;B8JL43;A0A2R8RRA6;Q6P3G0	3;3;3;3;1	Serotransferrin	tfa	tr|X1WE71|X1WE71_DANRE Transferrin-a (Fragment) OS=Danio rerio OX=7955 GN=tfa PE=1 SV=1;tr|A0A0R4IHQ0|A0A0R4IHQ0_DANRE Serotransferrin OS=Danio rerio OX=7955 GN=tfa PE=1 SV=2;tr|B8JL43|B8JL43_DANRE Serotransferrin OS=Danio rerio OX=7955 GN=tfa PE=1 SV=1;tr	16.3	21.766	202;665;673;687;520	0	0	0	0	879130	1028800	1414000	1505800
A0A0R4IHT4;Q90Y37;A0A0R4IVY5	2;2;1	Rho-associated protein kinase	rock2a	tr|A0A0R4IHT4|A0A0R4IHT4_DANRE Rho-associated protein kinase OS=Danio rerio OX=7955 GN=rock2a PE=1 SV=2;tr|Q90Y37|Q90Y37_DANRE Rho-associated protein kinase OS=Danio rerio OX=7955 GN=rock2a PE=1 SV=1;tr|A0A0R4IVY5|A0A0R4IVY5_DANRE Rho-associated protein ki	1.4	162.21	1396;1375;1359	110670	3312100	0	52931	0	0	0	0
A0A0R4II20	5			tr|A0A0R4II20|A0A0R4II20_DANRE Laminin, alpha 1 OS=Danio rerio OX=7955 GN=lama1 PE=1 SV=1	2	335.8	3075	0	0	0	0	1837300	632090	409330	600450
Q6PBW7;A0A0R4IJ49;E9QHH0	11;11;10		rps19	tr|Q6PBW7|Q6PBW7_DANRE 40S ribosomal protein S19 OS=Danio rerio OX=7955 GN=rps19 PE=1 SV=1;tr|A0A0R4IJ49|A0A0R4IJ49_DANRE 40S ribosomal protein S19 OS=Danio rerio OX=7955 GN=rps19 PE=1 SV=1;tr|E9QHH0|E9QHH0_DANRE 40S ribosomal protein S19 OS=Danio rerio OX	61.6	15.941	146;152;149	1119800000	1170700000	1570400000	1663100000	1410600000	1183500000	1633000000	1735100000
A0A0R4IJE8;A0A2R8QAK4;A0A0R4ITG0	1;1;1			tr|A0A0R4IJE8|A0A0R4IJE8_DANRE Si:ch73-236c18.2 OS=Danio rerio OX=7955 GN=si:ch73-236c18.2 PE=4 SV=2;tr|A0A2R8QAK4|A0A2R8QAK4_DANRE Zgc:194906 OS=Danio rerio OX=7955 GN=zgc:194906 PE=4 SV=1;tr|A0A0R4ITG0|A0A0R4ITG0_DANRE Zgc:194906 OS=Danio rerio OX=7955 G	0.9	85.678	741;843;879	2409100	0	3915000	3443200	0	0	3717600	4009700
A0A140LFU9;A0A1D5NSI5;A0A0R4IKH3	4;4;4			tr|A0A140LFU9|A0A140LFU9_DANRE Zgc:55733 OS=Danio rerio OX=7955 GN=zgc:55733 PE=1 SV=2;tr|A0A1D5NSI5|A0A1D5NSI5_DANRE Zgc:55733 OS=Danio rerio OX=7955 GN=zgc:55733 PE=1 SV=2;tr|A0A0R4IKH3|A0A0R4IKH3_DANRE Zgc:55733 OS=Danio rerio OX=7955 GN=zgc:55733 PE=1	15.8	29.23	259;279;289	381040	796100	770390	871810	488210	455150	348880	333710
A0A286YAS1;E9QFA1;A0A0R4IKV6;F1QP18;E7F299;A0A2R8RYP3;A0A2R8RT68;E7F720;A0A2R8QBZ9;A0A2R8Q920;A0A2R8RPS9	1;1;1;1;1;1;1;1;1;1;1		LOC100334068;zgc:175135;zgc:165551;LOC100538023	tr|A0A286YAS1|A0A286YAS1_DANRE Zgc:173545 OS=Danio rerio OX=7955 GN=zgc:173545 PE=4 SV=2;tr|E9QFA1|E9QFA1_DANRE Zgc:173545 OS=Danio rerio OX=7955 GN=zgc:173545 PE=4 SV=3;tr|A0A0R4IKV6|A0A0R4IKV6_DANRE Zgc:175135 OS=Danio rerio OX=7955 GN=zgc:175135 PE=4 SV	3.7	42.418	383;390;409;419;421;422;422;423;423;423;429	0	0	1307500	0	433750	607780	0	0
A0A0R4IKW3;Q7ZVA6	6;6	Eukaryotic initiation factor 4A-III	eif4a3	tr|A0A0R4IKW3|A0A0R4IKW3_DANRE RNA helicase OS=Danio rerio OX=7955 GN=eif4a3 PE=1 SV=1;sp|Q7ZVA6|IF4A3_DANRE Eukaryotic initiation factor 4A-III OS=Danio rerio OX=7955 GN=eif4a3 PE=2 SV=1	15.3	46.477	406;406	1431800	829020	1832000	3420300	7484200	5675600	6517300	6729800
A0A0R4IL71	8			tr|A0A0R4IL71|A0A0R4IL71_DANRE Insulin-degrading enzyme OS=Danio rerio OX=7955 GN=ide PE=1 SV=1	9.1	115.53	998	12179000	10023000	0	36510	0	0	0	0
A0A0R4IMF8;Q6NYR4;A0A2R8Q860;A0A2R8QEN9;Q90473;Q1LY29;Q1LY27	26;26;26;25;19;11;2	Heat shock cognate 71 kDa protein	hspa8	tr|A0A0R4IMF8|A0A0R4IMF8_DANRE Heat shock cognate 71 kDa protein OS=Danio rerio OX=7955 GN=hspa8 PE=1 SV=2;tr|Q6NYR4|Q6NYR4_DANRE Heat shock cognate 71 kDa protein OS=Danio rerio OX=7955 GN=hspa8 PE=1 SV=1;tr|A0A2R8Q860|A0A2R8Q860_DANRE Heat shock cognate	46.8	70.145	634;649;654;658;649;188;127	88070000	37069000	52964000	37848000	92251000	63337000	125500000	156590000
A0A0R4IMM3;Q6PBY7	1;1	Trafficking protein particle complex subunit 13	trappc13	tr|A0A0R4IMM3|A0A0R4IMM3_DANRE Trafficking protein particle complex subunit 13 OS=Danio rerio OX=7955 GN=trappc13 PE=1 SV=1;sp|Q6PBY7|TPC13_DANRE Trafficking protein particle complex subunit 13 OS=Danio rerio OX=7955 GN=trappc13 PE=2 SV=2	3.3	46.789	418;412	4861300	4285700	3185200	1939000	6262900	952840	2461900	3721300
A0A0R4IMS3;Q8JGR4	10;10	60S ribosomal protein L24	rpl24	tr|A0A0R4IMS3|A0A0R4IMS3_DANRE 60S ribosomal protein L24 OS=Danio rerio OX=7955 GN=rpl24 PE=1 SV=1;sp|Q8JGR4|RL24_DANRE 60S ribosomal protein L24 OS=Danio rerio OX=7955 GN=rpl24 PE=2 SV=1	42.7	17.883	157;157	1062500000	841860000	595830000	709890000	997570000	916160000	1185000000	1312200000
A0A0R4IMS6;F1QK02;A0A286YA24	3;3;3		mrps22	tr|A0A0R4IMS6|A0A0R4IMS6_DANRE Mitochondrial ribosomal protein S22 OS=Danio rerio OX=7955 GN=mrps22 PE=1 SV=2;tr|F1QK02|F1QK02_DANRE Mitochondrial ribosomal protein S22 OS=Danio rerio OX=7955 GN=mrps22 PE=1 SV=2;tr|A0A286YA24|A0A286YA24_DANRE Mitochondrial	11.1	38.724	332;340;340	0	320380	986380	811070	1273500	1903500	929850	614000
A0A0R4INC4;A5WV02;A0A2R8QEG3;A0A2R8PVX9;A0A2R8QKW7;A0A2R8RIJ1;A0A2R8PZA9;A0A2R8QLG6;E7F8G7;A0A286YBE9	2;2;2;2;2;2;2;2;2;2		pleca	tr|A0A0R4INC4|A0A0R4INC4_DANRE Plectin a OS=Danio rerio OX=7955 GN=pleca PE=1 SV=2;tr|A5WV02|A5WV02_DANRE Plectin a OS=Danio rerio OX=7955 GN=pleca PE=1 SV=1;tr|A0A2R8QEG3|A0A2R8QEG3_DANRE Plectin a OS=Danio rerio OX=7955 GN=pleca PE=1 SV=1;tr|A0A2R8PVX9|A	0.5	521.61	4569;4577;4580;4580;4587;4599;4623;4707;4762;4773	861410	0	425870	15331	0	0	2540900	1380900
A0A286Y8W6;A0A0R4IQB8	6;6			tr|A0A286Y8W6|A0A286Y8W6_DANRE pre-rRNA processing protein FTSJ3 OS=Danio rerio OX=7955 GN=ftsj3 PE=1 SV=1;tr|A0A0R4IQB8|A0A0R4IQB8_DANRE pre-rRNA processing protein FTSJ3 OS=Danio rerio OX=7955 GN=ftsj3 PE=1 SV=1	10.8	95.35	837;838	584740	935930	1740000	1445100	6044400	6118600	6586500	8482100
F1RE85;A0A0R4IQN8;Q8JIU7;A0A2R8QLG5	3;3;3;2	Nascent polypeptide-associated complex subunit alpha	naca	tr|F1RE85|F1RE85_DANRE Nascent polypeptide-associated complex subunit alpha OS=Danio rerio OX=7955 GN=naca PE=1 SV=1;tr|A0A0R4IQN8|A0A0R4IQN8_DANRE Nascent polypeptide-associated complex subunit alpha OS=Danio rerio OX=7955 GN=naca PE=1 SV=1;sp|Q8JIU7|NACA	19.3	23.774	218;1030;215;1005	3017300	1616600	1624100	783240	5396300	5459300	12423000	11120000
A0A0R4IUM3;A0A2R9YJM9	1;1			tr|A0A0R4IUM3|A0A0R4IUM3_DANRE Amyloid beta (A4) precursor protein-binding, family A, member 1a OS=Danio rerio OX=7955 GN=apba1a PE=4 SV=2;tr|A0A2R9YJM9|A0A2R9YJM9_DANRE Amyloid beta (A4) precursor protein-binding, family A, member 1a OS=Danio rerio OX=795	2.4	107.08	957;968	0	0	0	0	0	0	0	0
A0A0R4IUQ9;Q6NXA4;A0A0R4IBM8;A0A0R4IBR5;A0A0R4IPU4	3;3;2;1;1	Interleukin enhancer-binding factor 3 homolog	ilf3	tr|A0A0R4IUQ9|A0A0R4IUQ9_DANRE Interleukin enhancer-binding factor 3b OS=Danio rerio OX=7955 GN=ilf3b PE=1 SV=1;sp|Q6NXA4|ILF3_DANRE Interleukin enhancer-binding factor 3 homolog OS=Danio rerio OX=7955 GN=ilf3 PE=1 SV=2;tr|A0A0R4IBM8|A0A0R4IBM8_DANRE Inter	3.8	90.432	833;833;218;191;243	149070	0	155370	275420	809060	978370	787650	450940
A0A2R8QT62;A9C3R0;A0A0R4IV16;A9C3R1	8;8;8;1		ifrd2	tr|A0A2R8QT62|A0A2R8QT62_DANRE Interferon-related developmental regulator 2 OS=Danio rerio OX=7955 GN=ifrd2 PE=1 SV=1;tr|A9C3R0|A9C3R0_DANRE Interferon-related developmental regulator 2 OS=Danio rerio OX=7955 GN=ifrd2 PE=1 SV=1;tr|A0A0R4IV16|A0A0R4IV16_DAN	19.4	46.605	422;435;455;138	3766700	8146900	11205000	13246000	16052000	15827000	13440000	15684000
A0A0R4IXF1;A0A0R4IUN4	3;2			tr|A0A0R4IXF1|A0A0R4IXF1_DANRE Nucleolar GTP-binding protein 2 OS=Danio rerio OX=7955 GN=gnl2 PE=1 SV=1;tr|A0A0R4IUN4|A0A0R4IUN4_DANRE Nucleolar GTP-binding protein 2 (Fragment) OS=Danio rerio OX=7955 GN=gnl2 PE=1 SV=1	6.1	82.826	726;261	459590	326820	178130	182850	725190	1341000	2118100	3222200
A0A0R4IYD0	7			tr|A0A0R4IYD0|A0A0R4IYD0_DANRE 40S ribosomal protein S27 OS=Danio rerio OX=7955 GN=rps27l PE=1 SV=1	46.4	9.5141	84	189130000	287040000	320180000	258100000	288430000	304490000	279290000	357700000
Q9PW80;A0A0R4IYT0;E9QJD2	15;15;1	Insulin-like growth factor 2 mRNA-binding protein 3	igf2bp3	sp|Q9PW80|IF2B3_DANRE Insulin-like growth factor 2 mRNA-binding protein 3 OS=Danio rerio OX=7955 GN=igf2bp3 PE=1 SV=1;tr|A0A0R4IYT0|A0A0R4IYT0_DANRE Insulin-like growth factor 2 mRNA-binding protein 3 OS=Danio rerio OX=7955 GN=igf2bp3 PE=1 SV=1	30.4	63.351	582;607;76	2942100	4733100	10578000	14726000	9521500	14657000	4799300	6190200
A0A286YA65;A0A0R4J8E6	2;2			tr|A0A286YA65|A0A286YA65_DANRE Pre-mRNA-processing factor 8 OS=Danio rerio OX=7955 GN=prpf8 PE=1 SV=2;tr|A0A0R4J8E6|A0A0R4J8E6_DANRE Pre-mRNA-processing factor 8 OS=Danio rerio OX=7955 GN=prpf8 PE=1 SV=1	0.9	272.63	2328;2342	103250	0	276000	0	621770	384600	570190	743750
A0A140LFT8;A0A2R8QCI5;A0A2R8QM46;A0A2R8QJ92;A0A2R8PZL5;A0A0G2KVR5;F1QVB7;A0A2R8QP64;A0A2R8QNK0;A0A2R8QEG4;F1R1G7;A0A2R8QM78;A0A2R8QJC7;A0A2R8S0C4;A0A2R8Q3X7;A0A2R8PXX9	5;2;2;2;2;2;2;2;2;2;2;2;2;1;1;1			tr|A0A140LFT8|A0A140LFT8_DANRE Si:dkey-9l20.3 (Fragment) OS=Danio rerio OX=7955 GN=si:dkey-9l20.3 PE=1 SV=1	6	1639.3	15157;217;242;242;242;242;268;344;344;344;371;371;371;156;298;344	0	0	0	0	0	0	2965500	2594700
A0A140LH34;A0A140LH63;A0A140LH11;A0A140LGZ1;A0A140LFZ1;A0A140LH24;B0R0K9;E7F5A4;A3KPR3	3;3;3;3;3;3;1;1;1			tr|A0A140LH34|A0A140LH34_DANRE Si:ch1073-159d7.7 OS=Danio rerio OX=7955 GN=h1l1 PE=3 SV=1;tr|A0A140LH63|A0A140LH63_DANRE Si:ch73-368j24.12 OS=Danio rerio OX=7955 GN=si:ch73-368j24.12 PE=3 SV=1;tr|A0A140LH11|A0A140LH11_DANRE Si:dkey-23a13.9 OS=Danio rerio O	14.7	20.177	197;201;201;201;205;206;176;199;201	54991	0	327100	111610	576960	551080	1176400	2280100
A8KBJ5;A0A140LG23;X1WC76;Q4QRF4;Q6PI20	3;3;3;3;2	Histone H3;Histone H3.2;Histone H3.3	si:ch211-113a14.14;si:dkey-108k21.24;h3f3a	tr|A8KBJ5|A8KBJ5_DANRE Histone H3 OS=Danio rerio OX=7955 GN=zgc:173552 PE=1 SV=1;tr|A0A140LG23|A0A140LG23_DANRE Histone H3 OS=Danio rerio OX=7955 GN=hist2h3ca1 PE=3 SV=1;tr|X1WC76|X1WC76_DANRE Si:dkey-108k21.24 (Fragment) OS=Danio rerio OX=7955 GN=si:dkey-	18.4	15.404	136;136;151;136;136	4944200	680580	51040000	4070000	141340000	36722000	266610000	41041000
A0A2R8RI79;A0A2R8RTZ6;F1QUS3;A0A140LG74;F1R003;F1QMZ0;F1QJ26;F1QNI8	3;3;3;3;3;3;3;3		zp2.5;zp2.1;zp2.3;zp2.6;si:zfos-1505d6.3	tr|A0A2R8RI79|A0A2R8RI79_DANRE Si:zfos-1505d6.3 OS=Danio rerio OX=7955 GN=si:zfos-1505d6.3 PE=4 SV=1;tr|A0A2R8RTZ6|A0A2R8RTZ6_DANRE Zona pellucida glycoprotein 2, tandem duplicate 5 OS=Danio rerio OX=7955 GN=zp2.5 PE=4 SV=1;tr|F1QUS3|F1QUS3_DANRE Zona pell	12.1	43.573	396;426;427;430;431;431;431;432	708240	1181400	4089300	3867800	534790	1139400	147370	110500
A0A140LGK1;Q6P698	3;3	Plastin-2	lcp1	tr|A0A140LGK1|A0A140LGK1_DANRE Plastin-2 OS=Danio rerio OX=7955 GN=lcp1 PE=1 SV=2;sp|Q6P698|PLSL_DANRE Plastin-2 OS=Danio rerio OX=7955 GN=lcp1 PE=2 SV=1	5.9	69.801	624;624	2801600	273500	0	55541	0	25481	0	0
A4FVM2;A0A140LGS2;X1WDJ9;Q561S9;Q4FZZ7;E7FE07;E7F5W3;E7EZX1;F1QTL1;Q5XJK2;E7EXD7	5;5;5;5;5;5;5;5;4;4;4	Histone H2A	fbxl6;si:dkey-108k21.19;mid1ip1;zgc:110434;si:ch211-113a14.16;si:dkey-108k21.26;si:dkey-261m9.15;zgc:195633;zgc:101846;si:ch211-113a14.19	tr|A4FVM2|A4FVM2_DANRE Histone H2A OS=Danio rerio OX=7955 GN=hist1h2a6 PE=2 SV=1;tr|A0A140LGS2|A0A140LGS2_DANRE Histone H2A OS=Danio rerio OX=7955 GN=si:ch1073-153i20.5 PE=3 SV=1;tr|X1WDJ9|X1WDJ9_DANRE Histone H2A (Fragment) OS=Danio rerio OX=7955 GN=si:dk	41.7	13.631	127;127;128;128;128;128;128;128;127;128;128	17833000	4391600	27406000	24242000	71422000	17087000	113950000	105580000
A0A140LGU1;E7FAZ5;A0A0R4IWH8	6;6;2		hp1bp3	tr|A0A140LGU1|A0A140LGU1_DANRE Heterochromatin protein 1-binding protein 3 OS=Danio rerio OX=7955 GN=hp1bp3 PE=1 SV=2;tr|E7FAZ5|E7FAZ5_DANRE Heterochromatin protein 1-binding protein 3 OS=Danio rerio OX=7955 GN=hp1bp3 PE=1 SV=2	13.6	66.831	610;599;143	167100	258240	79863	248750	1744500	1236000	8986400	5743600
A0A1L1QZG2;A0A1L1QZW8;A0A1L1QZN4;A0A1L1QZB6;A0A1L1QZE0;A0A1L1QZV6	3;3;3;2;1;1			tr|A0A1L1QZG2|A0A1L1QZG2_DANRE Uncharacterized protein OS=Danio rerio OX=7955 GN=LOC110439410 PE=4 SV=1;tr|A0A1L1QZW8|A0A1L1QZW8_DANRE Zgc:173770 OS=Danio rerio OX=7955 GN=zgc:173770 PE=4 SV=1;tr|A0A1L1QZN4|A0A1L1QZN4_DANRE Uncharacterized protein OS=Danio	5.6	84.324	816;818;818;876;761;816	1535600	2450700	4525300	788390	297820	973230	0	149990
A0A286Y805	1			tr|A0A286Y805|A0A286Y805_DANRE Choline transporter-like protein 5-B OS=Danio rerio OX=7955 GN=slc44a5b PE=3 SV=2	1.4	81.195	717	1424400	900040	31918	48438	0	30171	33126	45217
A0A286Y8J9;A0A286YAC7;F1QIR8;A0A2R8PV91;A0A2R9YJI1;A3KQR6;A8HAI7;A0A286Y9Q9;E7EZV4;A3KQR5;A8HAI9	8;6;6;4;1;1;1;1;1;1;1		si:dkeyp-98a7.9	tr|A0A286Y8J9|A0A286Y8J9_DANRE Si:dkeyp-98a7.9 OS=Danio rerio OX=7955 GN=si:dkeyp-98a7.9 PE=1 SV=2;tr|A0A286YAC7|A0A286YAC7_DANRE Si:dkeyp-98a7.9 OS=Danio rerio OX=7955 GN=si:dkeyp-98a7.9 PE=1 SV=1;tr|F1QIR8|F1QIR8_DANRE Si:dkeyp-98a7.9 (Fragment) OS=Danio	61.7	14.752	128;128;136;137;129;137;139;146;150;156;190	47956000	117660000	125920000	167930000	82750000	37318000	55842000	36385000
Q7T3L3;A0A286YAP4	2;2		hsp90b1	tr|Q7T3L3|Q7T3L3_DANRE Chaperone protein GP96 OS=Danio rerio OX=7955 GN=hsp90b1 PE=1 SV=1;tr|A0A286YAP4|A0A286YAP4_DANRE Heat shock protein 90, beta (grp94), member 1 OS=Danio rerio OX=7955 GN=hsp90b1 PE=1 SV=2	3.3	91.281	793;823	2634000	1304800	530030	95556	702130	490060	159900	881850
A0A286YB87;X1WC78;A0A2R8QQC4;A0A2R8QE00	1;1;1;1		si:ch211-189e2.3	tr|A0A286YB87|A0A286YB87_DANRE Si:ch211-189e2.3 OS=Danio rerio OX=7955 GN=si:ch211-189e2.3 PE=4 SV=2;tr|X1WC78|X1WC78_DANRE Si:ch211-189e2.3 OS=Danio rerio OX=7955 GN=si:ch211-189e2.3 PE=4 SV=1;tr|A0A2R8QQC4|A0A2R8QQC4_DANRE Uncharacterized protein OS=Dani	0.7	199.49	1780;1814;1814;1817	17151	0	69263	181520	47749	84680	0	0
A0A2R8PWR1;F1QU55;Q32LQ4	2;2;2	Betaine--homocysteine S-methyltransferase 1	bhmt	tr|A0A2R8PWR1|A0A2R8PWR1_DANRE Betaine--homocysteine S-methyltransferase 1 OS=Danio rerio OX=7955 GN=bhmt PE=1 SV=1;tr|F1QU55|F1QU55_DANRE Betaine--homocysteine S-methyltransferase 1 OS=Danio rerio OX=7955 GN=bhmt PE=1 SV=1;sp|Q32LQ4|BHMT1_DANRE Betaine--h	9.2	43.255	392;400;400	0	0	0	0	843040	491860	1807500	1617300
A0A2R8PXB7;F1QNF2	1;1		cbx3a	tr|A0A2R8PXB7|A0A2R8PXB7_DANRE Chromobox homolog 3a (HP1 gamma homolog, Drosophila) OS=Danio rerio OX=7955 GN=cbx3a PE=1 SV=1;tr|F1QNF2|F1QNF2_DANRE Chromobox homolog 3a (HP1 gamma homolog, Drosophila) OS=Danio rerio OX=7955 GN=cbx3a PE=1 SV=2	6.9	20.043	174;177	46369	30924	139450	121740	362690	0	0	0
E9QHY5;A0A2R8QG14;A0A2R8PXE5	4;4;4		si:dkey-229d11.5	tr|E9QHY5|E9QHY5_DANRE Si:dkey-229d11.5 OS=Danio rerio OX=7955 GN=si:dkey-229d11.5 PE=1 SV=2;tr|A0A2R8QG14|A0A2R8QG14_DANRE Si:dkey-229d11.5 OS=Danio rerio OX=7955 GN=si:dkey-229d11.5 PE=1 SV=1;tr|A0A2R8PXE5|A0A2R8PXE5_DANRE Si:dkey-229d11.5 OS=Danio rerio	5.8	95.09	910;910;910	4156000	5215600	5601300	30162000	11098000	17008000	750620	532430
Q7ZU67;A0A2R8Q3A3;A0A2R8PYN1;Q802C9;F1R166;A0A0R4IKM4	6;6;6;5;5;2		eif4a1b;eif4a1a;eif4a2	tr|Q7ZU67|Q7ZU67_DANRE RNA helicase OS=Danio rerio OX=7955 GN=eif4a1b PE=1 SV=1;tr|A0A2R8Q3A3|A0A2R8Q3A3_DANRE RNA helicase OS=Danio rerio OX=7955 GN=eif4a1b PE=1 SV=1;tr|A0A2R8PYN1|A0A2R8PYN1_DANRE RNA helicase OS=Danio rerio OX=7955 GN=eif4a1b PE=1 SV=1;	15.3	46.122	406;407;412;406;411;124	8905500	3550300	303370	145090	560450	598030	374650	474870
A0A2R8QAE1;A0A2R8PYX8	7;7			tr|A0A2R8QAE1|A0A2R8QAE1_DANRE Fibrinogen C-terminal domain-containing protein OS=Danio rerio OX=7955 GN=LOC100334800 PE=1 SV=1;tr|A0A2R8PYX8|A0A2R8PYX8_DANRE Fibrinogen C-terminal domain-containing protein OS=Danio rerio OX=7955 GN=LOC100334800 PE=1 SV=1	34.9	28.142	241;246	1046700	1980300	11346000	15833000	25949000	25678000	16354000	27167000
A0A2R8PZ44;A0A2R8RUD8;F1Q5I0	3;3;3		cdk5rap3	tr|A0A2R8PZ44|A0A2R8PZ44_DANRE CDK5 regulatory subunit-associated protein 3 OS=Danio rerio OX=7955 GN=cdk5rap3 PE=1 SV=1;tr|A0A2R8RUD8|A0A2R8RUD8_DANRE CDK5 regulatory subunit-associated protein 3 OS=Danio rerio OX=7955 GN=cdk5rap3 PE=1 SV=1;tr|F1Q5I0|F1Q5	7.2	55.149	488;501;507	737340	1305600	1508100	699000	362760	834760	962010	678430
A0A2R8PZR2;A0A2R8RID8;A0A2R8Q7H3	2;2;2			tr|A0A2R8PZR2|A0A2R8PZR2_DANRE Uncharacterized protein OS=Danio rerio OX=7955 PE=4 SV=1;tr|A0A2R8RID8|A0A2R8RID8_DANRE Uncharacterized protein OS=Danio rerio OX=7955 PE=4 SV=1;tr|A0A2R8Q7H3|A0A2R8Q7H3_DANRE Zgc:100951 OS=Danio rerio OX=7955 GN=zgc:100951 P	13	19.68	169;170;170	0	0	1902500	1860200	1026300	776720	404820	448730
A0A2R8Q736;A0A2R8RI07;A0A2R8Q1C6;P61485;A0A2R8QT38	4;4;4;4;3	60S ribosomal protein L36a	rpl36a	tr|A0A2R8Q736|A0A2R8Q736_DANRE 60S ribosomal protein L36a OS=Danio rerio OX=7955 GN=rpl36a PE=1 SV=1;tr|A0A2R8RI07|A0A2R8RI07_DANRE 60S ribosomal protein L36a OS=Danio rerio OX=7955 GN=rpl36a PE=1 SV=1;tr|A0A2R8Q1C6|A0A2R8Q1C6_DANRE 60S ribosomal protein L	20.3	14.847	128;133;165;106;55	36126000	37666000	34350000	34329000	36681000	30771000	62408000	43464000
Q6PC12;A0A2R8Q1X2;E9QCX7;Q6PC89;F6NUZ4	5;5;4;3;1	Enolase	eno1a;eno1b	tr|Q6PC12|Q6PC12_DANRE 2-phospho-D-glycerate hydro-lyase OS=Danio rerio OX=7955 GN=eno1a PE=1 SV=1;tr|A0A2R8Q1X2|A0A2R8Q1X2_DANRE 2-phospho-D-glycerate hydro-lyase OS=Danio rerio OX=7955 GN=eno1a PE=1 SV=1;tr|E9QCX7|E9QCX7_DANRE 2-phospho-D-glycerate hydro	15.3	47.073	432;432;303;433;97	31929000	13024000	282140	544520	248270	321990	266320	150330
A0A2R8Q2N5;B8A569;B8A568;B8A561;F1R6C7;Q6IQX1;A2BGX6;E7FAD0;F1QVX3	20;20;20;20;17;17;17;9;7		myhz1.3;myhz1.1;myhz1.2;myha;myhz2;myhc4	tr|A0A2R8Q2N5|A0A2R8Q2N5_DANRE Myosin, heavy polypeptide 1.2, skeletal muscle OS=Danio rerio OX=7955 GN=myhz1.2 PE=3 SV=1;tr|B8A569|B8A569_DANRE Myosin, heavy polypeptide 1.3, skeletal muscle OS=Danio rerio OX=7955 GN=myhz1.3 PE=1 SV=1;tr|B8A568|B8A568_DAN	14.4	221.93	1935;1937;1937;1937;1933;1935;1935;1631;1937	0	0	0	0	0	0	13220000	21707000
A0A2R8QE02;F1QJD7;A0A2R8Q308;F1R862;A0A2R8QBM5;A0A2R8Q629;A0A2R8QR42;A3KQV6;A3KQV5;A0A2R8QG91;F1R863;A0A2R8QBZ0;A0A2R8PXR7;A0A0N4SUF7;F6NMZ5;F1QP30;A0A2R8Q5V8;F1QA36;A0A2R8PZB6;A0A2R8QKW9	3;3;3;3;3;3;2;2;2;2;2;2;2;2;2;2;1;1;1;1		si:ch211-226h8.14;si:ch211-226h8.4;si:ch211-226h8.8;zgc:172218;si:ch211-226h8.6	tr|A0A2R8QE02|A0A2R8QE02_DANRE Si:ch211-226h8.14 OS=Danio rerio OX=7955 GN=si:ch211-226h8.14 PE=1 SV=1;tr|F1QJD7|F1QJD7_DANRE Si:ch211-226h8.14 (Fragment) OS=Danio rerio OX=7955 GN=si:ch211-226h8.14 PE=1 SV=1;tr|A0A2R8Q308|A0A2R8Q308_DANRE Si:ch211-226h8.4	27.8	17.474	158;174;150;153;167;160;149;174;174;162;108;156;156;152;152;175;158;168;173;149	1858900	3059800	2317800	2437200	1989000	2415500	1049700	1154900
F1RE74;A0A2R8Q379;A0A2R8QMA2	1;1;1		rbm25a	tr|F1RE74|F1RE74_DANRE RNA-binding motif protein 25a (Fragment) OS=Danio rerio OX=7955 GN=rbm25a PE=4 SV=1;tr|A0A2R8Q379|A0A2R8Q379_DANRE RNA-binding motif protein 25a OS=Danio rerio OX=7955 GN=rbm25a PE=4 SV=1;tr|A0A2R8QMA2|A0A2R8QMA2_DANRE RNA-binding mo	2.3	42.648	347;361;417	1524900	1773900	0	2136700	1838000	2030800	2313500	2693200
F1R3Q7;A0A2R8Q3F9;A0A2R8RL46	1;1;1		rrp9	tr|F1R3Q7|F1R3Q7_DANRE Ribosomal RNA-processing 9, U3 small nucleolar RNA-binding protein OS=Danio rerio OX=7955 GN=rrp9 PE=1 SV=1;tr|A0A2R8Q3F9|A0A2R8Q3F9_DANRE Ribosomal RNA-processing 9, U3 small nucleolar RNA-binding protein OS=Danio rerio OX=7955 GN=r	2.6	52.325	468;468;471	0	637090	390670	533700	0	0	461630	443400
A0A2R8Q3N4	1			tr|A0A2R8Q3N4|A0A2R8Q3N4_DANRE Uncharacterized protein OS=Danio rerio OX=7955 GN=tp53inp2 PE=4 SV=1	6.4	19	173	0	0	250700	189580	653070	780250	965250	1294400
F1QE56;B6IDE8;A0A2R8Q3V0	1;1;1		frem3	tr|F1QE56|F1QE56_DANRE Fras1-related extracellular matrix 3 (Fragment) OS=Danio rerio OX=7955 GN=frem3 PE=1 SV=1;tr|B6IDE8|B6IDE8_DANRE Fras1-related extracellular matrix 3 OS=Danio rerio OX=7955 GN=frem3 PE=1 SV=1;tr|A0A2R8Q3V0|A0A2R8Q3V0_DANRE Fras1-rela	0.5	342.84	3075;3127;3127	0	0	0	0	0	0	291830	364880
A0A2R8Q4W3;Q6NYA0;Q7SXP4;A0A2R8Q2W1;E9QGF8;E9QIC5	4;4;4;3;3;2	Serine/arginine-rich splicing factor 1B;Serine/arginine-rich splicing factor 1A	srsf1b;srsf1a	tr|A0A2R8Q4W3|A0A2R8Q4W3_DANRE Splicing factor, arginine/serine-rich 1 OS=Danio rerio OX=7955 GN=srsf1a PE=1 SV=1;sp|Q6NYA0|SRS1B_DANRE Serine/arginine-rich splicing factor 1B OS=Danio rerio OX=7955 GN=srsf1b PE=2 SV=1;sp|Q7SXP4|SRS1A_DANRE Serine/arginine	15.2	27.488	244;245;257;186;193;116	649820	874480	1705200	1483300	4105800	2080700	4222000	4936600
A0A2R8Q549;A0A2R8RIU9;Q1MTC4;F1R8J4;F1R876	18;18;18;8;8		vtg2	tr|A0A2R8Q549|A0A2R8Q549_DANRE Phosvitin OS=Danio rerio OX=7955 GN=vtg2 PE=1 SV=1;tr|A0A2R8RIU9|A0A2R8RIU9_DANRE Phosvitin OS=Danio rerio OX=7955 GN=vtg2 PE=1 SV=1;tr|Q1MTC4|Q1MTC4_DANRE Phosvitin OS=Danio rerio OX=7955 GN=vtg2 PE=1 SV=1	13.3	172.35	1559;1597;1631;794;832	2990800	3996300	2527400	6196800	3376500	2262200	4173200	7315300
A0A2R8Q5G6;Q66I42;E7F638;A0A2R8RLT8;A0A2R8QLR0;R4GDR8	5;5;2;2;2;1		msna	tr|A0A2R8Q5G6|A0A2R8Q5G6_DANRE Moesin a OS=Danio rerio OX=7955 GN=msna PE=1 SV=1;tr|Q66I42|Q66I42_DANRE Moesin a OS=Danio rerio OX=7955 GN=msna PE=1 SV=1	8.9	67.068	570;579;577;579;580;174	10816000	1901800	0	28372	0	0	30575	161700
F1R881;A0A2R8Q6L8	12;12		skiv2l	tr|F1R881|F1R881_DANRE SKI2 homolog, superkiller viralicidic activity 2-like OS=Danio rerio OX=7955 GN=skiv2l PE=1 SV=1;tr|A0A2R8Q6L8|A0A2R8Q6L8_DANRE SKI2 homolog, superkiller viralicidic activity 2-like OS=Danio rerio OX=7955 GN=skiv2l PE=1 SV=1	11.4	139.73	1249;1277	1571600	3449000	7142100	4973400	8697100	10029000	7307700	9387700
A0A2R8Q6V3;Q6NWF6	13;13	Keratin, type II cytoskeletal 8	krt8	tr|A0A2R8Q6V3|A0A2R8Q6V3_DANRE Keratin, type II cytoskeletal 8 OS=Danio rerio OX=7955 GN=krt8 PE=1 SV=1;sp|Q6NWF6|K2C8_DANRE Keratin, type II cytoskeletal 8 OS=Danio rerio OX=7955 GN=krt8 PE=1 SV=1	23.1	57.453	516;520	0	0	557610	457340	6560400	3990700	5531100	3770100
Q7ZWE1;A0A2R8Q6Z2	2;2		pwp1	tr|Q7ZWE1|Q7ZWE1_DANRE PWP1 homolog (S. cerevisiae) OS=Danio rerio OX=7955 GN=pwp1 PE=1 SV=1;tr|A0A2R8Q6Z2|A0A2R8Q6Z2_DANRE PWP1 homolog, endonuclein OS=Danio rerio OX=7955 GN=pwp1 PE=1 SV=1	8	54.662	490;521	205510	0	202660	423990	593840	497380	472370	763250
A0A2R8Q720;E9QI62;A0A0R4IUS4;E7F1L7;F1QL44	4;4;2;2;2		flna;flnca;flncb	tr|A0A2R8Q720|A0A2R8Q720_DANRE Uncharacterized protein OS=Danio rerio OX=7955 GN=flna PE=1 SV=1;tr|E9QI62|E9QI62_DANRE Filamin A, alpha (actin-binding protein 280) OS=Danio rerio OX=7955 GN=flna PE=3 SV=1;tr|A0A0R4IUS4|A0A0R4IUS4_DANRE Filamin C, gamma a (	1.8	271.72	2545;2553;2702;2719;2773	2465600	1281700	2906300	1113000	924080	1423300	2932300	1923600
F1QTC1;F1Q5V4;A0A2R8QEG8;A0A2R8Q731;E9QIB8	8;8;8;8;2		stau1	tr|F1QTC1|F1QTC1_DANRE Staufen double-stranded RNA-binding protein 1 OS=Danio rerio OX=7955 GN=stau1 PE=1 SV=1;tr|F1Q5V4|F1Q5V4_DANRE Staufen double-stranded RNA-binding protein 1 OS=Danio rerio OX=7955 GN=stau1 PE=1 SV=1;tr|A0A2R8QEG8|A0A2R8QEG8_DANRE Sta	16.2	69.785	636;690;690;702;171	111710	146070	334440	652940	2770800	1998800	4275900	5809500
Q6NZZ2;A0A2R8QAS5;E9QJ46;A0A2R8Q7L1	2;2;2;2		arpc4;arpc4l	tr|Q6NZZ2|Q6NZZ2_DANRE Actin-related protein 2/3 complex subunit 4 OS=Danio rerio OX=7955 GN=arpc4 PE=1 SV=1;tr|A0A2R8QAS5|A0A2R8QAS5_DANRE Actin-related protein 2/3 complex subunit 4 OS=Danio rerio OX=7955 PE=3 SV=1;tr|E9QJ46|E9QJ46_DANRE Actin-related pr	11.3	19.678	168;184;193;201	1787600	1589600	0	0	0	0	39507	198300
E9QJP3;A0A2R8Q7X2	7;7		si:dkey-90l23.1	tr|E9QJP3|E9QJP3_DANRE Si:dkey-90l23.1 OS=Danio rerio OX=7955 GN=si:dkey-90l23.1 PE=1 SV=1;tr|A0A2R8Q7X2|A0A2R8Q7X2_DANRE Si:dkey-90l23.1 OS=Danio rerio OX=7955 GN=si:dkey-90l23.1 PE=1 SV=1	35.2	25.329	227;227	8960400	5932700	8050400	10378000	16133000	3990200	5707700	4976500
Q802C7;A0A2R8Q8T5;Q6NYX2;Q803N5;A0A2R8PYV5;X1WD19;A0A2R8QEL5	2;2;1;1;1;1;1		tardbp;tardbpl	tr|Q802C7|Q802C7_DANRE TAR DNA-binding protein 43 OS=Danio rerio OX=7955 GN=tardbp PE=1 SV=1;tr|A0A2R8Q8T5|A0A2R8Q8T5_DANRE TAR DNA-binding protein 43 OS=Danio rerio OX=7955 GN=tardbp PE=1 SV=1;tr|Q6NYX2|Q6NYX2_DANRE TAR DNA-binding protein 43 OS=Danio rer	5.8	44.427	412;415;298;303;304;401;402	530160	430480	491640	417770	1698700	1087500	1336700	3359800
Q6PBZ1;A0A2R8Q9K6	20;20		rpl7a	tr|Q6PBZ1|Q6PBZ1_DANRE 60S ribosomal protein L7a OS=Danio rerio OX=7955 GN=rpl7a PE=1 SV=1;tr|A0A2R8Q9K6|A0A2R8Q9K6_DANRE 60S ribosomal protein L7a OS=Danio rerio OX=7955 GN=rpl7a PE=1 SV=1	57.9	30.01	266;266	680470000	1509100000	981190000	965430000	1301500000	1321200000	1988200000	1801000000
A0A2R8QBD2;A2BDW5;Q7T2E8;Q6NUX8;Q6DHM9;Q6DHE8;B0R1F6;Q7T399	2;2;2;2;2;2;1;1		rhoaa;rhoac;rhoab;rhoad;rhoae	tr|A0A2R8QBD2|A0A2R8QBD2_DANRE Rho-related GTP-binding protein RhoA-B OS=Danio rerio OX=7955 GN=rhoab PE=4 SV=1;tr|A2BDW5|A2BDW5_DANRE Rho-related GTP-binding protein RhoA-A OS=Danio rerio OX=7955 GN=rhoaa PE=4 SV=1;sp|Q7T2E8|RHOAC_DANRE Rho-related GTP-bi	19.1	15.558	136;149;193;193;193;193;94;193	1626200	406120	0	0	0	0	0	0
A0A2R8QKR3;A0A2R8QBG3;F1QV15;A0A2R8RSX9;A0A2R8Q4P4	47;47;47;11;2		vtg6	tr|A0A2R8QKR3|A0A2R8QKR3_DANRE Phosvitin OS=Danio rerio OX=7955 GN=vtg6 PE=1 SV=1;tr|A0A2R8QBG3|A0A2R8QBG3_DANRE Phosvitin OS=Danio rerio OX=7955 GN=vtg6 PE=1 SV=1;tr|F1QV15|F1QV15_DANRE Phosvitin (Fragment) OS=Danio rerio OX=7955 GN=vtg6 PE=1 SV=1	36.2	147.82	1350;1365;1368;319;127	748560	2155700	1764800	3977200	3272900	1875900	3248900	5509000
A0A2R8RVH8;A0A2R8QBM8;Q7T005	1;1;1	Rab11 family-interacting protein 3	rab11fip3	tr|A0A2R8RVH8|A0A2R8RVH8_DANRE FIP-RBD domain-containing protein OS=Danio rerio OX=7955 PE=4 SV=1;tr|A0A2R8QBM8|A0A2R8QBM8_DANRE Rab11 family-interacting protein 3 OS=Danio rerio OX=7955 GN=rab11fip3 PE=4 SV=1;sp|Q7T005|RFIP3_DANRE Rab11 family-interacting	5.3	48.407	419;1875;1183	3082100	0	0	0	0	0	0	0
A0A2R8QBN1;Q6Q421	7;7		rps15	tr|A0A2R8QBN1|A0A2R8QBN1_DANRE 40S ribosomal protein S15 OS=Danio rerio OX=7955 GN=rps15 PE=1 SV=1;tr|Q6Q421|Q6Q421_DANRE 40S ribosomal protein S15 OS=Danio rerio OX=7955 GN=rps15 PE=1 SV=1	56.8	16.329	139;145	172420000	290690000	246230000	332260000	285930000	365850000	315750000	315010000
A0A2R8QC66;F1Q9T9;F1QGI3	11;11;11		rpl23a	tr|A0A2R8QC66|A0A2R8QC66_DANRE Ribosomal protein L23a OS=Danio rerio OX=7955 GN=rpl23a PE=1 SV=1;tr|F1Q9T9|F1Q9T9_DANRE Ribosomal protein L23a (Fragment) OS=Danio rerio OX=7955 GN=rpl23a PE=1 SV=1;tr|F1QGI3|F1QGI3_DANRE Ribosomal protein L23a OS=Danio reri	55.1	16.757	147;152;155	115490000	328520000	264260000	259080000	320120000	242670000	339110000	488170000
A0A2R8QFK5	1			tr|A0A2R8QFK5|A0A2R8QFK5_DANRE Poly [ADP-ribose] polymerase OS=Danio rerio OX=7955 GN=parp142.2 PE=4 SV=1	2.3	62.076	560	0	5164000	114790	254310	0	0	0	0
A0A2R8QGN2;Q6IMW8	1;1		rpl39	tr|A0A2R8QGN2|A0A2R8QGN2_DANRE Ribosomal protein L39 OS=Danio rerio OX=7955 GN=rpl39 PE=1 SV=1;tr|Q6IMW8|Q6IMW8_DANRE Ribosomal protein L39 OS=Danio rerio OX=7955 GN=rpl39 PE=1 SV=1	20	6.2594	50;51	5449700	6892900	67447000	74187000	81881000	52857000	10683000	6857000
A0A2R8QH30;Q6IQV0;Q803N7;E9QHH7;E9QCX0;E9QIP1;B0R0Q0;A0A0R4IE41	4;4;4;3;3;3;1;1		zgc:86598;csnk2a1	tr|A0A2R8QH30|A0A2R8QH30_DANRE Casein kinase 2, alpha 1 polypeptide OS=Danio rerio OX=7955 GN=csnk2a1 PE=1 SV=1;tr|Q6IQV0|Q6IQV0_DANRE Zgc:86598 OS=Danio rerio OX=7955 GN=zgc:86598 PE=1 SV=1;tr|Q803N7|Q803N7_DANRE Casein kinase 2 alpha 1 OS=Danio rerio OX=	15.2	43.69	374;393;395;140;141;232;105;389	605110	705070	704020	627530	2391300	2306800	1754200	3485000
A0A2R8QHA9;Q6DH77	2;2		pbdc1	tr|A0A2R8QHA9|A0A2R8QHA9_DANRE Polysaccharide biosynthesis domain-containing 1 OS=Danio rerio OX=7955 GN=pbdc1 PE=1 SV=1;tr|Q6DH77|Q6DH77_DANRE Polysaccharide biosynthesis domain-containing 1 OS=Danio rerio OX=7955 GN=pbdc1 PE=1 SV=1	13.5	18.709	163;173	0	0	709790	700270	1691300	2614100	1623300	1462400
E9QFV1;F1QW66;A0A2R8QHE6	3;3;3		ddx41	tr|E9QFV1|E9QFV1_DANRE DEAD (Asp-Glu-Ala-Asp) box polypeptide 41 OS=Danio rerio OX=7955 GN=ddx41 PE=1 SV=1;tr|F1QW66|F1QW66_DANRE DEAD (Asp-Glu-Ala-Asp) box polypeptide 41 (Fragment) OS=Danio rerio OX=7955 GN=ddx41 PE=1 SV=1;tr|A0A2R8QHE6|A0A2R8QHE6_DANRE	12.2	24.783	222;229;326	586480	0	829710	0	1907400	0	202790	0
A0A2R8QHQ4;Q6DRD0;X1WHE2	9;9;5		ebna1bp2	tr|A0A2R8QHQ4|A0A2R8QHQ4_DANRE EBNA1-binding protein 2 OS=Danio rerio OX=7955 GN=ebna1bp2 PE=1 SV=1;tr|Q6DRD0|Q6DRD0_DANRE EBNA1 binding protein 2-like OS=Danio rerio OX=7955 GN=ebna1bp2 PE=1 SV=1;tr|X1WHE2|X1WHE2_DANRE EBNA1-binding protein 2 (Fragment) O	26.9	35.517	308;308;156	6032400	9974000	4193600	3744100	6132200	14147000	19749000	14234000
A0A2R8QI69;F1QMB4	1;1		golgb1	tr|A0A2R8QI69|A0A2R8QI69_DANRE Golgin B1 OS=Danio rerio OX=7955 GN=golgb1 PE=1 SV=1;tr|F1QMB4|F1QMB4_DANRE Golgin B1 OS=Danio rerio OX=7955 GN=golgb1 PE=1 SV=1	0.2	371.01	3211;3355	2391500	344310	0	0	0	0	0	0
A0A2R8QI78;Q803E5;A0A0R4IPP6	8;8;4		etf1b	tr|A0A2R8QI78|A0A2R8QI78_DANRE Eukaryotic peptide chain release factor subunit 1 OS=Danio rerio OX=7955 GN=etf1b PE=1 SV=1;tr|Q803E5|Q803E5_DANRE Eukaryotic peptide chain release factor subunit 1 OS=Danio rerio OX=7955 GN=etf1b PE=1 SV=1;tr|A0A0R4IPP6|A0A0	21.5	50.723	452;442;422	1556200	1571300	5632300	5530700	13405000	12937000	18689000	15822000
A0A2R8QIK4;P83571	1;1	RuvB-like 2	ruvbl2	tr|A0A2R8QIK4|A0A2R8QIK4_DANRE RuvB-like helicase OS=Danio rerio OX=7955 GN=ruvbl2 PE=1 SV=1;sp|P83571|RUVB2_DANRE RuvB-like 2 OS=Danio rerio OX=7955 GN=ruvbl2 PE=1 SV=1	2.6	50.348	454;463	0	53069	172370	286480	0	283690	0	310610
F1QJK4;A0A2R8QIT8;F1QC64	5;5;5		myh9b	tr|F1QJK4|F1QJK4_DANRE Myosin, heavy chain 9b, non-muscle (Fragment) OS=Danio rerio OX=7955 GN=myh9b PE=1 SV=2;tr|A0A2R8QIT8|A0A2R8QIT8_DANRE Myosin, heavy chain 9b, non-muscle OS=Danio rerio OX=7955 GN=myh9b PE=1 SV=1;tr|F1QC64|F1QC64_DANRE Myosin, heavy	3.9	196.35	1686;1742;1749	8094300	11450000	0	0	0	0	488170	156750
A0A2R8QJZ5;A9C3W5	7;7		si:dkey-159f12.2	tr|A0A2R8QJZ5|A0A2R8QJZ5_DANRE Si:dkey-159f12.2 OS=Danio rerio OX=7955 GN=rps11l PE=1 SV=1;tr|A9C3W5|A9C3W5_DANRE Si:dkey-159f12.2 (Fragment) OS=Danio rerio OX=7955 GN=rps11l PE=1 SV=1	30.9	18.753	162;172	2608900	5959000	4686300	5163600	5748500	5673000	4804600	6633200
A0A2R8QLZ9	1			tr|A0A2R8QLZ9|A0A2R8QLZ9_DANRE Ig-like domain-containing protein OS=Danio rerio OX=7955 PE=4 SV=1	4	27.123	250	0	0	0	0	0	0	0	0
A0A2R8QV67;A0A2R8QN47;F1Q7L0;A0A2R8RWE8;F1R743	55;55;54;13;3		vtg4	tr|A0A2R8QV67|A0A2R8QV67_DANRE Phosvitin OS=Danio rerio OX=7955 GN=vtg4 PE=1 SV=1;tr|A0A2R8QN47|A0A2R8QN47_DANRE Phosvitin OS=Danio rerio OX=7955 GN=vtg4 PE=1 SV=1;tr|F1Q7L0|F1Q7L0_DANRE Phosvitin (Fragment) OS=Danio rerio OX=7955 GN=vtg4 PE=1 SV=1	43.4	147.38	1347;1360;1363;315;213	55559000	82062000	131330000	137970000	240960000	153840000	244170000	397720000
Q7ZU99;A0A2R8QNF0;Q29RA2	10;10;5	Transitional endoplasmic reticulum ATPase	vcp;zgc:136908	sp|Q7ZU99|TERA_DANRE Transitional endoplasmic reticulum ATPase OS=Danio rerio OX=7955 GN=vcp PE=1 SV=1;tr|A0A2R8QNF0|A0A2R8QNF0_DANRE Transitional endoplasmic reticulum ATPase OS=Danio rerio OX=7955 GN=vcp PE=1 SV=1;tr|Q29RA2|Q29RA2_DANRE Transitional endo	15.4	89.423	806;806;805	14775000	5399000	294010	526050	821120	875730	1470300	1761000
B3DKC5;A0A2R8QPG3	1;1		lmna	tr|B3DKC5|B3DKC5_DANRE Lamin A OS=Danio rerio OX=7955 GN=lmna PE=1 SV=1;tr|A0A2R8QPG3|A0A2R8QPG3_DANRE Lamin A OS=Danio rerio OX=7955 GN=lmna PE=1 SV=1	2.3	73.671	659;675	3867000	4656600	0	0	0	0	0	0
A0A2R8QQ28;Q1MTC6;A0A2R8RHW2;A0A2R8RVB7;F1R2T3;A0A2R8RN02;A0A2R8QNH7;E9QFD8;A0A2R8RUJ6	42;42;42;42;42;41;41;41;13		vtg7;vtg4	tr|A0A2R8QQ28|A0A2R8QQ28_DANRE Phosvitin OS=Danio rerio OX=7955 GN=vtg7 PE=1 SV=1;tr|Q1MTC6|Q1MTC6_DANRE Phosvitin OS=Danio rerio OX=7955 GN=vtg7 PE=1 SV=1;tr|A0A2R8RHW2|A0A2R8RHW2_DANRE Phosvitin OS=Danio rerio OX=7955 GN=vtg7 PE=1 SV=1;tr|A0A2R8RVB7|A0A2	37	142.48	1296;1343;1343;1351;1358;1335;1342;1350;317	2117500	3071600	3201400	7448200	6166400	4062000	7457500	14264000
Q6PC01;F1RA98;A0A2R8QQM5	4;4;4		faua;faub	tr|Q6PC01|Q6PC01_DANRE 40S ribosomal protein S30 OS=Danio rerio OX=7955 GN=faua PE=2 SV=1;tr|F1RA98|F1RA98_DANRE 40S ribosomal protein S30 OS=Danio rerio OX=7955 GN=faub PE=3 SV=1;tr|A0A2R8QQM5|A0A2R8QQM5_DANRE 40S ribosomal protein S30 OS=Danio rerio OX=7	14.3	14.625	133;133;133	54245000	89395000	75461000	73426000	66887000	86539000	95112000	80958000
A0A2R8QRI6;F1QJ75	1;1	NADH-cytochrome b5 reductase	cyb5r1	tr|A0A2R8QRI6|A0A2R8QRI6_DANRE NADH-cytochrome b5 reductase OS=Danio rerio OX=7955 GN=cyb5r1 PE=1 SV=1;tr|F1QJ75|F1QJ75_DANRE NADH-cytochrome b5 reductase OS=Danio rerio OX=7955 GN=cyb5r1 PE=1 SV=1	6.5	33.118	294;304	1977800	611360	0	0	0	0	0	0
A0A2R8QSR4;Q92005	7;7	Elongation factor 1-alpha	eef1a	tr|A0A2R8QSR4|A0A2R8QSR4_DANRE Elongation factor 1-alpha OS=Danio rerio OX=7955 GN=eef1a1l1 PE=1 SV=1;sp|Q92005|EF1A_DANRE Elongation factor 1-alpha OS=Danio rerio OX=7955 GN=eef1a PE=2 SV=1	19.9	50.06	462;462	431630	961880	959880	1502100	0	2598300	2740800	1788100
A0A2R8QTL0;O93409;E9QG51;Q66I73;E9QJI5	4;4;3;3;2		mylpfa;mylpfb	tr|A0A2R8QTL0|A0A2R8QTL0_DANRE Myosin light chain, phosphorylatable, fast skeletal muscle a OS=Danio rerio OX=7955 GN=mylpfa PE=1 SV=1;tr|O93409|O93409_DANRE Mylz2 protein OS=Danio rerio OX=7955 GN=mylpfa PE=1 SV=1;tr|E9QG51|E9QG51_DANRE Myosin light chain	22.6	18.734	168;169;136;170;145	0	0	0	0	0	0	2441400	4190600
A0A2R8QU07	8			tr|A0A2R8QU07|A0A2R8QU07_DANRE Quinoid dihydropteridine reductase b2 OS=Danio rerio OX=7955 GN=qdprb2 PE=1 SV=1	48.6	27.519	257	2461000	2155700	5770800	7038800	4444800	3118800	692430	698920
A0A2R8RL59;B8A478;A0A2R8QCM7	12;12;6		zgc:171517	tr|A0A2R8RL59|A0A2R8RL59_DANRE Zgc:171517 OS=Danio rerio OX=7955 GN=zgc:171517 PE=1 SV=1;tr|B8A478|B8A478_DANRE Zgc:171517 OS=Danio rerio OX=7955 GN=zgc:171517 PE=1 SV=1;tr|A0A2R8QCM7|A0A2R8QCM7_DANRE Uncharacterized protein OS=Danio rerio OX=7955 PE=4 SV=	55.8	28.158	260;257;167	28315000	31291000	38255000	29125000	57600000	32704000	33583000	24394000
A0A2R8RMU0;B8A4S8	2;2		zp3c	tr|A0A2R8RMU0|A0A2R8RMU0_DANRE Zona pellucida glycoprotein 3c OS=Danio rerio OX=7955 GN=zp3c PE=4 SV=1;tr|B8A4S8|B8A4S8_DANRE Zona pellucida glycoprotein 3c (Fragment) OS=Danio rerio OX=7955 GN=zp3c PE=1 SV=1	11.6	33.392	292;487	0	142040	325040	326700	777250	426880	133630	291210
Q7ZW09;A0A2R8RN29	1;1		hnrpl	tr|Q7ZW09|Q7ZW09_DANRE Heterogeneous nuclear ribonucleoprotein L OS=Danio rerio OX=7955 GN=hnrnpl PE=1 SV=1;tr|A0A2R8RN29|A0A2R8RN29_DANRE Heterogeneous nuclear ribonucleoprotein L OS=Danio rerio OX=7955 GN=hnrnpl PE=1 SV=1	2.4	59.168	536;538	0	0	0	531120	488900	669430	402170	706400
Q803M1;A0A2R8RR81;A0A2R8QH41;Q7ZVK9;A0A0R4IM99;Q6P0W3;Q6NYQ0;Q6IQD7;A0A2R8Q650;I3ISQ1;F1QKG7;F1R412;Q7T3F0;A0A0R4IAL5;A0A2R8RYF6;A0A2R8RQ88;P13104;A7E2K1;Q1LXM1;A0A0R4IMN8;A0A0R4INL7;E7FBZ3;Q1LXM2;A0A1D5NSA5;A0A286Y9C2;A0A1I7Q3W7;A0A1D5NSX9;CON__Q3SX28;A0A1D5NSG1;Q7SXW1;A0A1D5NS40;A0A1D5NSE7;A0A1D5NSG3;A0A1D5NSL6;A0A1D5NSY1;A0A2R8Q7U4	3;3;2;2;2;2;2;2;2;2;2;2;2;2;2;2;2;2;2;2;2;2;2;2;1;1;1;1;1;1;1;1;1;1;1;1	Tropomyosin alpha-1 chain	tpm3;tpm1;tpm2;tpm4a;tpma;zgc:171719	tr|Q803M1|Q803M1_DANRE Tropomyosin 3 OS=Danio rerio OX=7955 GN=tpm3 PE=1 SV=1;tr|A0A2R8RR81|A0A2R8RR81_DANRE Tropomyosin 3 OS=Danio rerio OX=7955 GN=tpm3 PE=1 SV=1;tr|A0A2R8QH41|A0A2R8QH41_DANRE Tropomyosin 1 (alpha) OS=Danio rerio OX=7955 GN=tpm1 PE=1 SV=	14.1	28.844	248;248;247;284;284;284;284;284;284;284;284;284;248;248;284;247;284;247;204;182;233;284;204;221;250;205;209;284;134;248;178;171;171;162;135;88	4143600	2690700	0	221830	150950	318270	1135200	3161300
A0A2R8RS24;Q8JHJ1	10;10	60S ribosomal protein L35	rpl35	tr|A0A2R8RS24|A0A2R8RS24_DANRE 60S ribosomal protein L35 OS=Danio rerio OX=7955 GN=rpl35 PE=1 SV=1;sp|Q8JHJ1|RL35_DANRE 60S ribosomal protein L35 OS=Danio rerio OX=7955 GN=rpl35 PE=2 SV=3	50	14.299	122;123	150660000	175680000	230970000	222420000	203370000	303130000	303870000	242740000
A0A2R8RTK5;Q6PI52;A0A2R8QP29;A0A2R8RYQ3;A0A2R8QJK1	5;5;4;1;1	Calmodulin	calm1a	tr|A0A2R8RTK5|A0A2R8RTK5_DANRE Calmodulin OS=Danio rerio OX=7955 GN=calm2b PE=1 SV=1;sp|Q6PI52|CALM_DANRE Calmodulin OS=Danio rerio OX=7955 GN=calm1a PE=2 SV=3;tr|A0A2R8QP29|A0A2R8QP29_DANRE Calmodulin OS=Danio rerio OX=7955 GN=calm2a PE=4 SV=1	28.6	17.953	161;149;149;82;90	36492000	23663000	779310	675200	590660	1000900	1166000	1127100
A0A2R8RUH9	1			tr|A0A2R8RUH9|A0A2R8RUH9_DANRE Fibrinogen C-terminal domain-containing protein OS=Danio rerio OX=7955 GN=LOC566119 PE=1 SV=1	6.1	28.891	245	0	0	402310	287630	579560	523950	676960	1570700
A0A2R8RZK5;B8A518;B8A516;Q6NWK7;E7F244;Q6DC49;E7EYT7;F1QQ90;Q6GQM1;I3ISC4;I3ISU3	12;12;11;11;10;8;7;7;6;4;1		tuba1c;tuba1b;tuba1a;si:ch211-114n24.6;tuba8l3;si:ch73-199e17.1;tuba7l	tr|A0A2R8RZK5|A0A2R8RZK5_DANRE Tubulin alpha chain OS=Danio rerio OX=7955 GN=tuba1c PE=3 SV=1;tr|B8A518|B8A518_DANRE Tubulin alpha chain OS=Danio rerio OX=7955 GN=tuba1c PE=3 SV=1;tr|B8A516|B8A516_DANRE Tubulin alpha chain OS=Danio rerio OX=7955 GN=tuba1b	43.4	48.534	435;451;449;451;451;450;449;477;450;144;98	58205000	14909000	1738500	1722800	2303400	1413300	4971700	8792900
A0A2R8S0G5	1			tr|A0A2R8S0G5|A0A2R8S0G5_DANRE Si:dkeyp-47f9.4 OS=Danio rerio OX=7955 GN=si:dkeyp-47f9.4 PE=4 SV=1	2.7	51.777	481	0	0	0	0	0	0	0	0
A0A2R8S0J9;Q1LUW0	3;3		rbm28	tr|A0A2R8S0J9|A0A2R8S0J9_DANRE RNA-binding motif protein 28 OS=Danio rerio OX=7955 GN=rbm28 PE=1 SV=1;tr|Q1LUW0|Q1LUW0_DANRE RNA-binding motif protein 28 OS=Danio rerio OX=7955 GN=rbm28 PE=1 SV=1	3.9	95.941	850;856	106450	307290	316400	389890	510210	279050	790280	536990
A0A2R9YJN8	4			tr|A0A2R9YJN8|A0A2R9YJN8_DANRE RNA helicase OS=Danio rerio OX=7955 GN=ddx21 PE=1 SV=1	8.5	87.947	791	0	33279	60288	147010	1152200	842140	2680900	2436500
E7FC99;F1QGH7;A0A5H1ZRJ2	6;6;6		ctnnb2;ctnnb1	tr|E7FC99|E7FC99_DANRE Catenin, beta 2 OS=Danio rerio OX=7955 GN=ctnnb2 PE=1 SV=2;sp|F1QGH7|CTNB1_DANRE Catenin beta-1 OS=Danio rerio OX=7955 GN=ctnnb1 PE=1 SV=1;tr|A0A5H1ZRJ2|A0A5H1ZRJ2_DANRE Catenin beta-1 OS=Danio rerio OX=7955 GN=ctnnb1 PE=1 SV=1	12.9	85.282	778;780;789	35941000	15744000	438340	35206	803220	713480	412100	669070
G3N3Y4;A0JMQ0	2;2	Ribosome biogenesis protein bop1	bop1	tr|G3N3Y4|G3N3Y4_DANRE Ribosome biogenesis protein BOP1 OS=Danio rerio OX=7955 GN=bop1 PE=1 SV=1;sp|A0JMQ0|BOP1_DANRE Ribosome biogenesis protein bop1 OS=Danio rerio OX=7955 GN=bop1 PE=2 SV=1	2.8	89.232	785;777	945020	934780	559440	777920	1490000	1278400	2415000	2634500
A2AR68;A0A0R4IED7;A0A2R8RLZ9;Q6TNT9	2;1;1;1		gdi1;gdi2	tr|A2AR68|A2AR68_DANRE Rab GDP dissociation inhibitor OS=Danio rerio OX=7955 GN=gdi1 PE=1 SV=1;tr|A0A0R4IED7|A0A0R4IED7_DANRE Rab GDP dissociation inhibitor OS=Danio rerio OX=7955 GN=zgc:112334 PE=3 SV=1;tr|A0A2R8RLZ9|A0A2R8RLZ9_DANRE Rab GDP dissociation	6	50.474	447;441;445;448	2560900	1392000	54003	0	42129	60966	0	0
A2AWE1;F1QSP8	2;1		prdx1;prdx4	tr|A2AWE1|A2AWE1_DANRE Peroxiredoxin-1 OS=Danio rerio OX=7955 GN=prdx1 PE=1 SV=2;tr|F1QSP8|F1QSP8_DANRE Peroxiredoxin 4 OS=Danio rerio OX=7955 GN=prdx4 PE=1 SV=1	9	22.061	199;260	11706000	2787900	490670	395460	0	0	0	0
F1QAC1;A2CE93	1;1		iqgap2	tr|F1QAC1|F1QAC1_DANRE IQ motif-containing GTPase-activating protein 2 OS=Danio rerio OX=7955 GN=iqgap2 PE=1 SV=2;tr|A2CE93|A2CE93_DANRE IQ motif-containing GTPase-activating protein 2 OS=Danio rerio OX=7955 GN=iqgap2 PE=1 SV=1	0.7	190.75	1673;1680	2241200	176340	0	0	0	0	0	0
A2CF52;O57341	2;2	Fibroblast growth factor	fgf8a	tr|A2CF52|A2CF52_DANRE Fibroblast growth factor OS=Danio rerio OX=7955 GN=fgf8a PE=3 SV=1;sp|O57341|FGF8A_DANRE Fibroblast growth factor 8 OS=Danio rerio OX=7955 GN=fgf8a PE=2 SV=1	9.5	23.484	199;210	0	0	70022	139430	846650	762010	240310	266770
F1QSS0;A3KP59;A0A2R8RQM9;F8W459	6;6;5;2	Bifunctional lysine-specific demethylase and histidyl-hydroxylase NO66	zgc:162967;no66	tr|F1QSS0|F1QSS0_DANRE Bifunctional lysine-specific demethylase and histidyl-hydroxylase OS=Danio rerio OX=7955 GN=riox1 PE=1 SV=1;sp|A3KP59|RIOX1_DANRE Ribosomal oxygenase 1 OS=Danio rerio OX=7955 GN=riox1 PE=2 SV=1;tr|A0A2R8RQM9|A0A2R8RQM9_DANRE Bifuncti	13.8	61.545	544;544;525;421	431750	1060300	900760	816600	2200000	2384200	4597700	5817000
X1WGM1;A3KPR4;A0A140LGV2	11;11;2	Histone H4	si:dkey-108k21.12;si:dkey-108k21.23	tr|X1WGM1|X1WGM1_DANRE Histone H4 (Fragment) OS=Danio rerio OX=7955 GN=zgc:163040 PE=3 SV=1;tr|A3KPR4|A3KPR4_DANRE Histone H4 OS=Danio rerio OX=7955 GN=hist1h4l PE=2 SV=1	59.6	11.367	104;103;94	116320000	26339000	104320000	74601000	262720000	50097000	413930000	517410000
A3KPU5	1		si:dkey-20i20.3	tr|A3KPU5|A3KPU5_DANRE Si:dkey-20i20.3 (Fragment) OS=Danio rerio OX=7955 GN=si:dkey-20i20.3 PE=4 SV=1	4.4	26.461	228	1776100	0	23261	0	0	0	0	0
A4IG47	2		dnajc10	tr|A4IG47|A4IG47_DANRE DnaJ homolog subfamily C member 10 OS=Danio rerio OX=7955 GN=dnajc10 PE=1 SV=1	3.5	90.545	791	15847	710910	49100	63548	346070	791190	98131	61534
E7F225;A4QN90	4;4		zgc:163061	tr|E7F225|E7F225_DANRE Zgc:163061 OS=Danio rerio OX=7955 GN=zgc:163061 PE=1 SV=1;tr|A4QN90|A4QN90_DANRE Zgc:163061 OS=Danio rerio OX=7955 GN=zgc:163061 PE=1 SV=1	35.1	11.732	114;115	1651500	250400	455610	398810	727120	533840	1617500	3331100
A5HAK0;F1QDH8;A0A2R8QCH5	8;7;6	Ribonuclease-like 3;N-terminal peptide;LF-ZF3	rnasel3	sp|A5HAK0|RNSL3_DANRE Ribonuclease-like 3 OS=Danio rerio OX=7955 GN=rnasel3 PE=1 SV=2;tr|F1QDH8|F1QDH8_DANRE Ribonuclease-like 3 OS=Danio rerio OX=7955 GN=rnasel3 PE=3 SV=1;tr|A0A2R8QCH5|A0A2R8QCH5_DANRE Ribonuclease-like 3 OS=Danio rerio OX=7955 GN=rnasel	57.7	17.011	149;149;149	54648000	63758000	77586000	74849000	60240000	43172000	33277000	41007000
A5HAK1	11		rnasel2	tr|A5HAK1|A5HAK1_DANRE RNase 2 OS=Danio rerio OX=7955 GN=rnasel2 PE=2 SV=1	52.7	16.928	150	30056000	29432000	29883000	19230000	29402000	32139000	26316000	23029000
Q642H5;A5PMV7	1;1		ppp2r1b;ppp2r1a	tr|Q642H5|Q642H5_DANRE Protein phosphatase 2 (Formerly 2A), regulatory subunit A, beta isoform OS=Danio rerio OX=7955 GN=ppp2r1bb PE=1 SV=1;tr|A5PMV7|A5PMV7_DANRE Protein phosphatase 2, regulatory subunit A, beta a OS=Danio rerio OX=7955 GN=ppp2r1ba PE=1 S	2.9	65.158	589;589	649330	0	25713	35750	41464	25712	19658	0
A5WWG5;A5WWG4;Q801U4;Q801U3	2;2;1;1		srsf3b;srsf3a	tr|A5WWG5|A5WWG5_DANRE Serine and arginine-rich-splicing factor 3b OS=Danio rerio OX=7955 GN=srsf3b PE=1 SV=1;tr|A5WWG4|A5WWG4_DANRE Serine and arginine-rich-splicing factor 3b OS=Danio rerio OX=7955 GN=srsf3b PE=1 SV=1;tr|Q801U4|Q801U4_DANRE Serine and ar	26.6	14.292	124;164;135;174	383550	0	229840	107050	1240600	807510	1218500	1898100
A7E2K4	14		rplp2l	tr|A7E2K4|A7E2K4_DANRE 60S acidic ribosomal protein P2 OS=Danio rerio OX=7955 GN=rplp2l PE=1 SV=1	100	11.638	114	2316500000	2281900000	2357000000	2478100000	2298300000	2186000000	3117400000	4203900000
A7YY10	8		zgc:171772	tr|A7YY10|A7YY10_DANRE Zgc:171772 OS=Danio rerio OX=7955 GN=zgc:171772 PE=1 SV=1	67.4	10.205	92	301400000	450650000	430790000	346480000	423770000	409630000	452440000	502430000
F1QNA5;A8DZG2;Q5SPH2;Q5SPH1;Q4V988;Q6DHJ0;Q802Y1	3;3;1;1;1;1;1		srsf6a;srsf6b	tr|F1QNA5|F1QNA5_DANRE Serine and arginine-rich-splicing factor 6a OS=Danio rerio OX=7955 GN=srsf6a PE=1 SV=1;tr|A8DZG2|A8DZG2_DANRE Serine and arginine-rich-splicing factor 6b OS=Danio rerio OX=7955 GN=srsf6b PE=1 SV=1	9.5	40.287	347;355;138;158;164;285;366	2822000	2681900	3355200	3631500	6328900	2960700	7284800	6868600
A8E526	11		rpl14	tr|A8E526|A8E526_DANRE 60S ribosomal protein L14 OS=Danio rerio OX=7955 GN=rpl14 PE=1 SV=1	52.5	16.128	139	730310000	891760000	902780000	887930000	865610000	743620000	837680000	944810000
A8E7G7;A8E7G6	1;1		prdx3	tr|A8E7G7|A8E7G7_DANRE Peroxiredoxin 3 OS=Danio rerio OX=7955 GN=prdx3 PE=1 SV=1;tr|A8E7G6|A8E7G6_DANRE Peroxiredoxin 3 OS=Danio rerio OX=7955 GN=prdx3 PE=1 SV=1	5.8	25.875	240;281	0	0	69489	0	0	247480	283770	186280
A8KB78	7		rps23	tr|A8KB78|A8KB78_DANRE 40S ribosomal protein S23 OS=Danio rerio OX=7955 GN=rps23 PE=1 SV=1	42	15.848	143	172480000	194640000	204720000	195720000	278860000	165500000	291190000	243560000
A8WGC6	5	ATP synthase subunit beta	atp5b	tr|A8WGC6|A8WGC6_DANRE ATP synthase subunit beta OS=Danio rerio OX=7955 GN=atp5f1b PE=1 SV=1	13	55.13	517	1982400	1490900	131430	100830	209460	138820	431710	140940
A8WHP2	2		zgc:171480	tr|A8WHP2|A8WHP2_DANRE Zgc:171480 OS=Danio rerio OX=7955 GN=zgc:171480 PE=4 SV=1	12	15.704	133	202760	587130	574450	780890	747200	932310	55377	541730
Q7ZSZ9;Q6DGB7;A9JRY8;Q6IQN5;Q29RC5;A2BHI1;A0A0G2KIS4;X1WG65;R4GEN8	3;3;3;2;2;2;1;1;1		rac1a;rac3a;rac3b;rac2;rac1b	tr|Q7ZSZ9|Q7ZSZ9_DANRE Rac family small GTPase 1a OS=Danio rerio OX=7955 GN=rac1a PE=1 SV=1;tr|Q6DGB7|Q6DGB7_DANRE Rac family small GTPase 3a OS=Danio rerio OX=7955 GN=rac3a PE=1 SV=1;tr|A9JRY8|A9JRY8_DANRE Rac family small GTPase 3b OS=Danio rerio OX=7955	18.2	21.534	192;192;192;192;192;219;166;205;229	2556200	479580	0	0	0	199570	0	0
B0R085;A0A0J9YIY7	9;5		zgc:103482	tr|B0R085|B0R085_DANRE Zgc:103482 OS=Danio rerio OX=7955 GN=zgc:103482 PE=1 SV=1;tr|A0A0J9YIY7|A0A0J9YIY7_DANRE Zgc:103482 (Fragment) OS=Danio rerio OX=7955 GN=zgc:103482 PE=1 SV=3	32	38.552	347;226	82701000	191250000	64833000	76788000	22649000	23891000	5921200	8951200
F1QW70;E7FH24;B0R0I6;A0A2R8PZ65;F1QQ92;A0A1D5NSR4;E7F7W5;X1WCW5;F1QYR7;F1QGL1	2;2;2;1;1;1;1;1;1;1	Chromodomain-helicase-DNA-binding protein 8	chd8;chd9;si:dkey-6e2.3;chd6;chd7	tr|F1QW70|F1QW70_DANRE DNA helicase (Fragment) OS=Danio rerio OX=7955 GN=chd8 PE=1 SV=1;tr|E7FH24|E7FH24_DANRE Chromodomain-helicase-DNA-binding protein 8 OS=Danio rerio OX=7955 GN=chd8 PE=1 SV=3;sp|B0R0I6|CHD8_DANRE Chromodomain-helicase-DNA-binding prote	1.2	250.52	2231;2555;2511;2097;2426;2443;2447;2935;2951;3140	43047000	2170400	686580	245860	678710	588400	594070	1103500
F1RBP8;B0S602	2;2		fn1a	tr|F1RBP8|F1RBP8_DANRE Fibronectin OS=Danio rerio OX=7955 GN=fn1a PE=1 SV=2;tr|B0S602|B0S602_DANRE Fibronectin OS=Danio rerio OX=7955 GN=fn1a PE=1 SV=1	1.2	272.12	2480;2480	0	0	0	0	744590	954350	223010	409900
Q6PH56;B0UXS6;B0UXR9;B0S610;A5PMG2;A0A0R4IJ78	14;14;14;14;9;5		hsp70.3;mcm5;hsp70.2;hsp70l;si:ch211-199o1.2	tr|Q6PH56|Q6PH56_DANRE Heat shock cognate 70-kd protein, tandem duplicate 3 OS=Danio rerio OX=7955 GN=hsp70.3 PE=2 SV=1;tr|B0UXS6|B0UXS6_DANRE Heat shock cognate 70-kd protein, tandem duplicate 1 OS=Danio rerio OX=7955 GN=hsp70.1 PE=2 SV=1;tr|B0UXR9|B0UXR9	23	70.469	643;643;643;643;639;296	28714000	3032700	595640	80421	293950	0	105140	193500
B0S754	3		snrnp200	tr|B0S754|B0S754_DANRE Activating signal cointegrator 1 complex subunit 3 OS=Danio rerio OX=7955 GN=snrnp200 PE=1 SV=1	2.4	243.98	2134	249360	84482	451370	89728	1447100	1081100	1073300	1077100
F1Q8C8;B0V3F8	5;5	Interferon-inducible double-stranded RNA-dependent protein kinase activator A homolog	prkra	tr|F1Q8C8|F1Q8C8_DANRE Interferon-inducible double-stranded RNA-dependent protein kinase activator A homolog OS=Danio rerio OX=7955 GN=prkra PE=1 SV=1;sp|B0V3F8|PRKRA_DANRE Interferon-inducible double-stranded RNA-dependent protein kinase activator A homol	16.6	31.559	289;282	2303100	2998900	2304500	2141200	2569100	2146500	2236000	1875000
F1QRQ0;B0V3S8;B0V3S9	8;8;4		myef2	tr|F1QRQ0|F1QRQ0_DANRE Myelin expression factor 2 OS=Danio rerio OX=7955 GN=myef2 PE=1 SV=2;tr|B0V3S8|B0V3S8_DANRE Myelin expression factor 2 OS=Danio rerio OX=7955 GN=myef2 PE=1 SV=1;tr|B0V3S9|B0V3S9_DANRE Myelin expression factor 2 OS=Danio rerio OX=7955	13.6	60.5	557;553;327	200160	669200	1098600	1993000	3994400	4712500	6657200	7603100
B3DID5	1		ccdc96	tr|B3DID5|B3DID5_DANRE Coiled-coil domain-containing 96 OS=Danio rerio OX=7955 GN=ccdc96 PE=1 SV=1	1.7	55.829	479	0	0	0	0	0	0	0	0
B3DKN1;Q6DRJ4	2;2	Protein KRI1 homolog	kri1	tr|B3DKN1|B3DKN1_DANRE Protein KRI1 homolog OS=Danio rerio OX=7955 GN=kri1 PE=2 SV=1;sp|Q6DRJ4|KRI1_DANRE Protein KRI1 homolog OS=Danio rerio OX=7955 GN=kri1 PE=2 SV=1	2.9	91.666	765;765	35284	84327	0	0	397850	421370	764410	419680
B5DE31	12		ybx1	sp|B5DE31|YBOX1_DANRE Y-box-binding protein 1 OS=Danio rerio OX=7955 GN=ybx1 PE=1 SV=1	54.8	35.012	310	23269000	30755000	13902000	6458100	61490000	44807000	47083000	51323000
B7ZD34;Q642J7;B7ZD32	4;4;3	40S ribosomal protein S24	rps24	tr|B7ZD34|B7ZD34_DANRE 40S ribosomal protein S24 OS=Danio rerio OX=7955 GN=rps24 PE=1 SV=1;tr|Q642J7|Q642J7_DANRE 40S ribosomal protein S24 OS=Danio rerio OX=7955 GN=rps24 PE=1 SV=1;tr|B7ZD32|B7ZD32_DANRE 40S ribosomal protein S24 OS=Danio rerio OX=7955 GN	34.8	15.344	132;131;119	87418000	118910000	343580000	140300000	125480000	143110000	117200000	220470000
Q7SZR4;B8A4H6;Q7T3G4;A7MCL3	4;4;3;1		pgam1a;pgam1b;pgam2	tr|Q7SZR4|Q7SZR4_DANRE Phosphoglycerate mutase OS=Danio rerio OX=7955 GN=pgam1a PE=1 SV=1;tr|B8A4H6|B8A4H6_DANRE Phosphoglycerate mutase OS=Danio rerio OX=7955 GN=pgam1b PE=1 SV=1;tr|Q7T3G4|Q7T3G4_DANRE Phosphoglycerate mutase OS=Danio rerio OX=7955 GN=pga	13.4	28.912	254;254;255;227	4431400	418640	41528	40123	51078	39211	67181	0
B8A552;A5WUY4	4;1		smarca5	tr|B8A552|B8A552_DANRE SWI/SNF-related, matrix-associated, actin-dependent regulator of chromatin, subfamily a, member 5 OS=Danio rerio OX=7955 GN=smarca5 PE=1 SV=1	4.5	120.53	1035;1036	136920	137800	577070	287210	709710	465060	816810	930010
F1QV66;B8A6A6;F6NQ00	1;1;1		ccar1	tr|F1QV66|F1QV66_DANRE Cell division cycle and apoptosis regulator 1 OS=Danio rerio OX=7955 GN=ccar1 PE=1 SV=3;tr|B8A6A6|B8A6A6_DANRE Cell division cycle and apoptosis regulator 1 OS=Danio rerio OX=7955 GN=ccar1 PE=1 SV=3;tr|F6NQ00|F6NQ00_DANRE Cell divisi	1.3	132.12	1155;1158;1194	0	0	0	0	0	0	0	623910
B8JHR9	4		kpnb3	tr|B8JHR9|B8JHR9_DANRE Karyopherin (importin) beta 3 OS=Danio rerio OX=7955 GN=kpnb3 PE=1 SV=2	4.7	122.74	1093	80417	177230	1897800	646760	2354700	3089800	3635300	1940600
B8JHU4;F1QER4	13;3		actn1	tr|B8JHU4|B8JHU4_DANRE Actinin, alpha 1 OS=Danio rerio OX=7955 GN=actn1 PE=1 SV=1	17.8	104.2	902;209	2228600	133810	0	0	0	0	64230	5856.7
E9QB18;B8JLQ3;F1R6L6	3;3;3		ncl	tr|E9QB18|E9QB18_DANRE Nucleolin OS=Danio rerio OX=7955 GN=ncl PE=1 SV=1;tr|B8JLQ3|B8JLQ3_DANRE Nucleolin OS=Danio rerio OX=7955 GN=ncl PE=1 SV=1;tr|F1R6L6|F1R6L6_DANRE Nucleolin OS=Danio rerio OX=7955 GN=ncl PE=1 SV=1	10.6	41.065	387;704;705	0	0	479340	360370	800250	912790	1960100	2371400
B8JM40	1		trmt10c	tr|B8JM40|B8JM40_DANRE Mitochondrial ribonuclease P protein 1 OS=Danio rerio OX=7955 GN=trmt10c PE=1 SV=1	4	47.163	403	0	0	0	560860	0	0	0	0
E7EXY4	1	Protein argonaute-2	CU929240.1	tr|E7EXY4|E7EXY4_DANRE Protein argonaute-2 OS=Danio rerio OX=7955 GN=ago2 PE=1 SV=1	2.3	99.018	873	0	0	334280	402700	462510	519160	364840	1074600
E7EY23;Q6DRE8	1;1		snrnp70	tr|E7EY23|E7EY23_DANRE U1 small nuclear ribonucleoprotein 70 kDa OS=Danio rerio OX=7955 GN=snrnp70 PE=1 SV=2;tr|Q6DRE8|Q6DRE8_DANRE U1 small nuclear ribonucleoprotein 70 kDa OS=Danio rerio OX=7955 GN=snrnp70 PE=1 SV=1	9.9	19.256	162;495	0	0	172440	247200	425950	457910	437470	482000
E7EYQ0	9		serbp1b	tr|E7EYQ0|E7EYQ0_DANRE SERPINE1 mRNA-binding protein 1b OS=Danio rerio OX=7955 GN=serbp1b PE=1 SV=3	27.6	43.987	410	19826	83070	109160	319870	630300	1495600	2471400	5331700
E7F017	8		CU929143.1	tr|E7F017|E7F017_DANRE Si:ch73-160p18.3 OS=Danio rerio OX=7955 GN=si:ch73-160p18.3 PE=1 SV=2	15.2	220.48	2151	7774400	16276000	11221000	13608000	11703000	6176500	2129100	1178200
E7F1G8	6		si:ch211-175g6.7	tr|E7F1G8|E7F1G8_DANRE RNA helicase OS=Danio rerio OX=7955 GN=ddx61 PE=1 SV=1	14.1	54.351	483	677540	868080	864380	212120	458730	300210	147190	249710
E7F2R1	23		LOC100332172	tr|E7F2R1|E7F2R1_DANRE Tetratricopeptide repeat domain 37 OS=Danio rerio OX=7955 GN=ttc37 PE=1 SV=2	20.1	176.07	1585	3428300	5986500	14943000	16520000	20318000	21576000	13155000	19138000
E7F354;Q6PC29;Q7ZUM0;Q7T3G2;B8JLJ3;Q6P102	3;3;2;2;1;1	14-3-3 protein gamma-1	ywhag2;ywhag1;ywhaqa;ywhah	tr|E7F354|E7F354_DANRE 3-monooxygenase/tryptophan 5-monooxygenase activation protein, gamma polypeptide 2 OS=Danio rerio OX=7955 GN=ywhag2 PE=1 SV=1;sp|Q6PC29|143G1_DANRE 14-3-3 protein gamma-1 OS=Danio rerio OX=7955 GN=ywhag1 PE=2 SV=1;tr|Q7ZUM0|Q7ZUM0_DA	15	28.307	247;247;245;246;244;245	1364500	251040	10869	35144	0	40533	0	0
E7F3N4	10		mki67	tr|E7F3N4|E7F3N4_DANRE Marker of proliferation Ki-67 OS=Danio rerio OX=7955 GN=mki67 PE=1 SV=1	5.5	225.21	2057	121880	142880	1299900	905220	5862400	7871000	4545200	6415500
X1WI07;E7F458	2;2		tp53inp2	tr|X1WI07|X1WI07_DANRE Tumor protein p53-inducible nuclear protein 2 (Fragment) OS=Danio rerio OX=7955 GN=tp53inp2 PE=4 SV=1;tr|E7F458|E7F458_DANRE Tumor protein p53-inducible nuclear protein 2 OS=Danio rerio OX=7955 GN=tp53inp2 PE=4 SV=1	25.5	17.371	157;158	154430	373240	0	263420	5531600	5497900	3488100	3499500
E7F4T4;A0A2R8QJT0	3;2		zc3h7b	tr|E7F4T4|E7F4T4_DANRE Zinc finger CCCH-type-containing 7Bb OS=Danio rerio OX=7955 GN=zc3h7bb PE=1 SV=1;tr|A0A2R8QJT0|A0A2R8QJT0_DANRE Uncharacterized protein OS=Danio rerio OX=7955 GN=zc3h7bb PE=4 SV=1	5.1	99.875	904;892	0	78804	454140	636520	735840	827160	309190	344240
E7F6B0	1		dtx4	tr|E7F6B0|E7F6B0_DANRE E3 ubiquitin-protein ligase OS=Danio rerio OX=7955 GN=dtx4b PE=3 SV=2	1.5	78.088	728	0	0	7956500	9029600	9736900	8669600	8215800	10472000
E7F8T6	2		nampta	tr|E7F8T6|E7F8T6_DANRE Nicotinamide phosphoribosyltransferase OS=Danio rerio OX=7955 GN=nampt1 PE=1 SV=1	6.3	55.931	493	1036600	43280	0	0	0	0	0	0
X1WH87;E7FA89	1;1		si:ch211-266o15.1	tr|X1WH87|X1WH87_DANRE Si:ch211-266o15.1 OS=Danio rerio OX=7955 GN=si:ch211-266o15.1 PE=1 SV=1;tr|E7FA89|E7FA89_DANRE Si:ch211-266o15.1 OS=Danio rerio OX=7955 GN=si:ch211-266o15.1 PE=1 SV=1	0.8	161.39	1455;1456	0	2374400	1222000	0	0	0	0	1944300
R4GEY3;E7FAK0;F1R9N6	2;2;2		si:ch211-113a14.24;si:ch211-113a14.12	tr|R4GEY3|R4GEY3_DANRE Si:ch211-113a14.18 OS=Danio rerio OX=7955 GN=si:ch211-113a14.18 PE=3 SV=1;tr|E7FAK0|E7FAK0_DANRE Si:ch211-113a14.24 OS=Danio rerio OX=7955 GN=si:ch211-113a14.24 PE=3 SV=1;tr|F1R9N6|F1R9N6_DANRE Si:ch211-113a14.12 OS=Danio rerio OX=79	10.6	20.606	199;199;201	0	0	0	0	0	0	628170	695380
E7FAM5	2	E3 ubiquitin-protein ligase TRIM71	trim71	sp|E7FAM5|LIN41_DANRE E3 ubiquitin-protein ligase TRIM71 OS=Danio rerio OX=7955 GN=trim71 PE=1 SV=1	3.8	90.677	824	23821	41454	121750	0	535140	1269400	502350	931190
E7FAQ8	2		hnrnpa1a	tr|E7FAQ8|E7FAQ8_DANRE Heterogeneous nuclear ribonucleoprotein A1a OS=Danio rerio OX=7955 GN=hnrnpa1a PE=1 SV=1	7.2	38.531	388	686550	0	0	45160	0	0	0	0
E7FAV9	5		mov10a	tr|E7FAV9|E7FAV9_DANRE RNA helicase OS=Danio rerio OX=7955 GN=mov10a PE=1 SV=1	7.4	113.92	1001	182200	256070	604360	697550	1655000	807200	1068900	896910
E7FBD3	6		apoba	tr|E7FBD3|E7FBD3_DANRE Apolipoprotein Ba OS=Danio rerio OX=7955 GN=apoba PE=1 SV=1	1.6	495.98	4418	0	0	0	0	249520	220440	2574700	2149700
E7FCM9;A0A2R8PYC0	2;1		znf593	tr|E7FCM9|E7FCM9_DANRE Zinc finger protein 593 OS=Danio rerio OX=7955 GN=znf593 PE=4 SV=1;tr|A0A2R8PYC0|A0A2R8PYC0_DANRE Zinc finger protein 593 OS=Danio rerio OX=7955 GN=znf593 PE=4 SV=1	27.9	14.907	129;56	137540	337820	445670	525550	1279800	1264800	2264300	3655800
E7FCU0;F1QGI4;A0A0A0MPF3;F1QW36;E9QGH7	2;2;1;1;1		npm1a	tr|E7FCU0|E7FCU0_DANRE Nucleophosmin OS=Danio rerio OX=7955 GN=npm1a PE=1 SV=1;tr|F1QGI4|F1QGI4_DANRE Nucleophosmin OS=Danio rerio OX=7955 GN=npm1a PE=1 SV=2;tr|A0A0A0MPF3|A0A0A0MPF3_DANRE Nucleophosmin 1a OS=Danio rerio OX=7955 GN=npm1a PE=1 SV=2;tr|F1QW3	10	31.158	279;281;160;192;214	845610	2168000	1765700	2112200	1664000	2776900	1750300	2281300
E7FD91	10		ddx6	tr|E7FD91|E7FD91_DANRE RNA helicase OS=Danio rerio OX=7955 GN=ddx6 PE=1 SV=2	25.4	53.91	484	10946000	15282000	3576600	5633200	1104900	1115900	619930	427240
E9QB24	1		tmem67	tr|E9QB24|E9QB24_DANRE Transmembrane protein 67 OS=Danio rerio OX=7955 GN=tmem67 PE=1 SV=1	0.7	109.52	982	93449000	120630000	120530000	0	103590000	110500000	138600000	0
E9QB42;F1Q4N7;Q7ZUP0	1;1;1	Acidic leucine-rich nuclear phosphoprotein 32 family member A	anp32a;anp32b	tr|E9QB42|E9QB42_DANRE Acidic leucine-rich nuclear phosphoprotein 32 family member A (Fragment) OS=Danio rerio OX=7955 GN=anp32a PE=1 SV=1;tr|F1Q4N7|F1Q4N7_DANRE Acidic (leucine-rich) nuclear phosphoprotein 32 family, member B OS=Danio rerio OX=7955 GN=anp	7.4	24.673	217;259;254	498620	0	0	0	0	0	0	0
E9QBV1;E9QD79;A0A2R8PXZ0;F1R966;A0A286YAZ4;E7FBE5	9;8;8;8;8;3	Clathrin heavy chain	cltcb;cltca	tr|E9QBV1|E9QBV1_DANRE Clathrin heavy chain OS=Danio rerio OX=7955 GN=cltcb PE=1 SV=1;tr|E9QD79|E9QD79_DANRE Clathrin heavy chain OS=Danio rerio OX=7955 GN=cltca PE=1 SV=3;tr|A0A2R8PXZ0|A0A2R8PXZ0_DANRE Clathrin heavy chain OS=Danio rerio OX=7955 GN=cltca	6.6	191.63	1677;1661;1666;1680;1684;1638	8869000	3560000	79060	276580	861940	1181200	933920	911970
E9QEB6;Q7ZUZ7;Q78AP9;Q6NYD8;A0A2R8QKI2;F8W522;Q803D1;Q6DC20;Q7ZUW4;Q6P5M5;Q6DHP3	2;2;2;2;1;1;1;1;1;1;1		arf1l;arf3b;arf2;arf1;arf4a;arf5;DKEY-238C7.11;arf3a	tr|E9QEB6|E9QEB6_DANRE ADP-ribosylation factor 2b (Fragment) OS=Danio rerio OX=7955 GN=arf2b PE=1 SV=1;tr|Q7ZUZ7|Q7ZUZ7_DANRE ADP-ribosylation factor 1 OS=Danio rerio OX=7955 GN=arf2b PE=1 SV=1;tr|Q78AP9|Q78AP9_DANRE ADP-ribosylation factor 3b OS=Danio rer	16.7	16.325	144;181;181;181;72;118;180;180;180;180;181	7722700	999350	0	93839	0	0	0	0
F1R2E0;E9QEE4;F8W2D3	3;3;1		hnrnpm	tr|F1R2E0|F1R2E0_DANRE Heterogeneous nuclear ribonucleoprotein M OS=Danio rerio OX=7955 GN=hnrnpm PE=1 SV=2;tr|E9QEE4|E9QEE4_DANRE Heterogeneous nuclear ribonucleoprotein M OS=Danio rerio OX=7955 GN=hnrnpm PE=1 SV=3	6.4	74.127	715;701;234	0	23827	250090	416180	1278300	2071900	1032000	4751800
E9QEI3;R4GEH4;E9QFX3;E9QFL6;Q6DH49;F1QZM2	4;4;4;4;4;4		dnajc9	tr|E9QEI3|E9QEI3_DANRE DnaJ (Hsp40) homolog, subfamily C, member 9 (Fragment) OS=Danio rerio OX=7955 GN=dnajc9 PE=1 SV=1;tr|R4GEH4|R4GEH4_DANRE DnaJ (Hsp40) homolog, subfamily C, member 9 (Fragment) OS=Danio rerio OX=7955 GN=dnajc9 PE=1 SV=1;tr|E9QFX3|E9QF	27.3	19.205	165;205;218;248;252;252	201550	271610	2073400	1524900	1932700	1637700	3673300	3357500
E9QF60;E9QGF0;Q642Z0;Q5U3A4	1;1;1;1	Calcium-transporting ATPase	atp2a1	tr|E9QF60|E9QF60_DANRE ATPase sarcoplasmic/endoplasmic reticulum Ca2+-transporting 1 (Fragment) OS=Danio rerio OX=7955 GN=atp2a1 PE=1 SV=8;tr|E9QGF0|E9QGF0_DANRE ATPase sarcoplasmic/endoplasmic reticulum Ca2+-transporting 1 (Fragment) OS=Danio rerio OX=795	23.7	10.939	97;102;994;1005	0	0	0	0	0	0	478690	610080
E9QH15;F1Q6N0	1;1		eftud2	tr|E9QH15|E9QH15_DANRE 116 kDa U5 small nuclear ribonucleoprotein component OS=Danio rerio OX=7955 GN=eftud2 PE=1 SV=1;tr|F1Q6N0|F1Q6N0_DANRE 116 kDa U5 small nuclear ribonucleoprotein component OS=Danio rerio OX=7955 GN=eftud2 PE=1 SV=1	2.7	109.02	970;973	0	0	0	0	0	0	0	395180
E9QH56	4	Nicotinamide-nucleotide adenylyltransferase	nmnat1	tr|E9QH56|E9QH56_DANRE Nicotinamide-nucleotide adenylyltransferase OS=Danio rerio OX=7955 GN=nmnat1 PE=1 SV=1	18.1	30.891	271	501450	301560	1400500	1162100	1414200	2333100	3827900	3222400
E9QHY3;Q6YMR2	2;2		phf5a	tr|E9QHY3|E9QHY3_DANRE PHD finger protein 5A OS=Danio rerio OX=7955 GN=phf5a PE=1 SV=1;tr|Q6YMR2|Q6YMR2_DANRE MCG1346-like protein OS=Danio rerio OX=7955 GN=phf5a PE=1 SV=1	20.6	11.488	102;110	322460	185020	92296	180420	677460	402720	474480	623240
Q6TGV6;E9QIF2;E9QFZ7	2;2;1	Proteasome subunit alpha type	psma5	tr|Q6TGV6|Q6TGV6_DANRE Proteasome subunit alpha type OS=Danio rerio OX=7955 GN=psma5 PE=1 SV=1;tr|E9QIF2|E9QIF2_DANRE Proteasome subunit alpha type (Fragment) OS=Danio rerio OX=7955 GN=psma5 PE=1 SV=1;tr|E9QFZ7|E9QFZ7_DANRE Proteasome subunit alpha type (F	12.9	26.407	241;240;195	1167000	408850	50794	0	63135	0	0	0
E9QIR9	11		rpl10	tr|E9QIR9|E9QIR9_DANRE 60S ribosomal protein L10 (Fragment) OS=Danio rerio OX=7955 GN=rpl10 PE=1 SV=1	55.9	18.236	161	11806000	11494000	14840000	12383000	14173000	11701000	15691000	20772000
E9QJ96;F1RBF6;Q7T356;Q5PRD0;F8W493	4;4;4;4;3	14-3-3 protein beta/alpha-B;14-3-3 protein beta/alpha-A	ywhaba;ywhabb	tr|E9QJ96|E9QJ96_DANRE 14-3-3 protein beta/alpha-A (Fragment) OS=Danio rerio OX=7955 GN=ywhaba PE=1 SV=1;tr|F1RBF6|F1RBF6_DANRE 14-3-3 protein beta/alpha-B OS=Danio rerio OX=7955 GN=ywhabb PE=1 SV=1;sp|Q7T356|143BB_DANRE 14-3-3 protein beta/alpha-B OS=Dani	20.8	25.757	226;242;242;244;195	1951000	1566700	31290	84429	0	0	69273	136870
F1QHC4;F1Q5F3;E9QIC9;E9QCX6	2;2;1;1		lmnb1	tr|F1QHC4|F1QHC4_DANRE Lamin B1 OS=Danio rerio OX=7955 GN=lmnb1 PE=1 SV=1;tr|F1Q5F3|F1Q5F3_DANRE Lamin B1 OS=Danio rerio OX=7955 GN=lmnb1 PE=1 SV=1;tr|E9QIC9|E9QIC9_DANRE Lamin B1 (Fragment) OS=Danio rerio OX=7955 GN=lmnb1 PE=1 SV=1;tr|E9QCX6|E9QCX6_DANRE	4.1	66.732	588;603;157;329	0	0	178490	0	229460	0	0	1053300
Q802Z9;F1Q5Q3	22;22		serbp1a	tr|Q802Z9|Q802Z9_DANRE SERPINE1 mRNA binding protein 1 OS=Danio rerio OX=7955 GN=serbp1a PE=1 SV=1;tr|F1Q5Q3|F1Q5Q3_DANRE SERPINE1 mRNA-binding protein 1a OS=Danio rerio OX=7955 GN=serbp1a PE=1 SV=1	59.1	43.134	391;392	65472000	98430000	103420000	115900000	121850000	116480000	148210000	229460000
F1Q6Z5;E9QBN6;E7FCQ0	3;2;2		cnbpa;cnbpb	tr|F1Q6Z5|F1Q6Z5_DANRE CCHC-type zinc finger, nucleic acid-binding protein a OS=Danio rerio OX=7955 GN=cnbpa PE=1 SV=1;tr|E9QBN6|E9QBN6_DANRE CCHC-type zinc finger, nucleic acid-binding protein a (Fragment) OS=Danio rerio OX=7955 GN=cnbpa PE=1 SV=1;tr|E7FC	23.9	18.015	163;124;161	42879	123730	641390	1367200	2254900	2570200	1170100	2222900
F1Q6Z7;Q803G3;Q567Y8;A0A0R4IV29	3;2;2;1	Serine/threonine-protein phosphatase	zgc:56064;ppp2cb;ppp2ca	tr|F1Q6Z7|F1Q6Z7_DANRE Serine/threonine-protein phosphatase OS=Danio rerio OX=7955 GN=ppp2cab PE=1 SV=1;tr|Q803G3|Q803G3_DANRE Serine/threonine-protein phosphatase OS=Danio rerio OX=7955 GN=ppp2cb PE=1 SV=1;tr|Q567Y8|Q567Y8_DANRE Serine/threonine-protein p	16.8	35.534	309;309;309;181	2061100	808440	386190	541500	216680	520220	247890	247720
F1Q749	4		dkc1	tr|F1Q749|F1Q749_DANRE Dyskeratosis congenita 1, dyskerin OS=Danio rerio OX=7955 GN=dkc1 PE=1 SV=1	10.7	56.676	506	16910	267040	247390	813990	2989600	1673500	5082000	5262100
F1Q898	5		lsm14b	tr|F1Q898|F1Q898_DANRE LSM family member 14B OS=Danio rerio OX=7955 GN=lsm14b PE=1 SV=1	17.1	41.539	380	3966400	4030800	232140	407640	0	0	0	0
F1Q8L0	2		mrpl46	tr|F1Q8L0|F1Q8L0_DANRE 39S ribosomal protein L46, mitochondrial OS=Danio rerio OX=7955 GN=mrpl46 PE=1 SV=1	11.9	32.814	286	726510	1176700	854600	1373300	446630	2491000	527840	918380
F1Q931;X1WDE4;A0A2R8RRR9	7;2;1		larp1b	tr|F1Q931|F1Q931_DANRE La ribonucleoprotein 1B OS=Danio rerio OX=7955 GN=larp1b PE=1 SV=1	7.2	121.33	1076;518;204	117830	378320	998200	1469000	3525400	3735400	3936400	5073200
F1Q9C7;Q6PGY6	8;7	E3 UFM1-protein ligase 1	ufl1	tr|F1Q9C7|F1Q9C7_DANRE E3 UFM1-protein ligase 1 OS=Danio rerio OX=7955 GN=ufl1 PE=1 SV=1;sp|Q6PGY6|UFL1_DANRE E3 UFM1-protein ligase 1 OS=Danio rerio OX=7955 GN=ufl1 PE=2 SV=1	12.6	88.798	793;793	1403900	2788900	3158600	2522800	2521600	1029100	2739500	1384800
F1QA11;Q6P0E5	1;1	DDRGK domain-containing protein 1	ddrgk1	tr|F1QA11|F1QA11_DANRE DDRGK domain-containing protein 1 OS=Danio rerio OX=7955 GN=ddrgk1 PE=4 SV=1;sp|Q6P0E5|DDRGK_DANRE DDRGK domain-containing protein 1 OS=Danio rerio OX=7955 GN=ddrgk1 PE=2 SV=1	12.1	13.764	124;300	122710	426260	298840	287250	147510	166520	106240	211920
F1QAM8	3		vim	tr|F1QAM8|F1QAM8_DANRE Vimentin OS=Danio rerio OX=7955 GN=vim PE=1 SV=1	7.3	52.537	455	3693800	207590	0	43980	41172	37841	1972000	1712200
F1QB54;B8JLJ5;I3ITD9;B8K0D6	27;7;5;2	Polyadenylate-binding protein	pabpc1a	sp|F1QB54|PABPA_DANRE Polyadenylate-binding protein 1A OS=Danio rerio OX=7955 GN=pabpc1a PE=1 SV=1	45.6	70.733	634;207;142;147	30784000	26908000	99054000	125490000	268840000	253590000	217880000	213680000
F1QBM2	5		pdcd4a	tr|F1QBM2|F1QBM2_DANRE Programmed cell death protein 4 OS=Danio rerio OX=7955 GN=pdcd4a PE=1 SV=1	16.5	52.021	467	5352600	9849400	3971200	5290200	1536500	2921700	1452300	2293100
Q7ZVX4;F1QBP2	3;3		rab14;rab14l	tr|Q7ZVX4|Q7ZVX4_DANRE Ras-related protein Rab-14 OS=Danio rerio OX=7955 GN=rab14 PE=1 SV=1;tr|F1QBP2|F1QBP2_DANRE Ras-related protein Rab-14 OS=Danio rerio OX=7955 GN=rab14l PE=1 SV=1	23.3	23.875	215;215	1839100	392610	0	0	0	0	0	28009
F1R7J6;F1QC38	2;2		syne1a	tr|F1R7J6|F1R7J6_DANRE Spectrin repeat-containing, nuclear envelope 1a OS=Danio rerio OX=7955 GN=syne1a PE=1 SV=3;tr|F1QC38|F1QC38_DANRE Spectrin repeat-containing, nuclear envelope 1a OS=Danio rerio OX=7955 GN=syne1a PE=1 SV=2	0.4	993	8650;8697	2692800	2236300	1979900	1729100	1881900	1956900	2801100	3532400
F8W3P6;F1QDC7;Q6NYD4	3;3;3	Protein MAK16 homolog	mak16	tr|F8W3P6|F8W3P6_DANRE Protein MAK16 homolog (Fragment) OS=Danio rerio OX=7955 GN=mak16 PE=1 SV=6;tr|F1QDC7|F1QDC7_DANRE Protein MAK16 homolog OS=Danio rerio OX=7955 GN=mak16 PE=1 SV=1;sp|Q6NYD4|MAK16_DANRE Protein MAK16 homolog OS=Danio rerio OX=7955 GN=m	14.9	30.485	255;305;303	464000	1853600	453250	973420	3040400	1602100	2504600	2439400
F1QDJ9	2	Signal recognition particle subunit SRP72	srp72	tr|F1QDJ9|F1QDJ9_DANRE Signal recognition particle subunit SRP72 OS=Danio rerio OX=7955 GN=srp72 PE=1 SV=2	4	66.242	595	526670	469320	391410	0	527100	0	557370	609400
F1QEF3	1		snrkb	tr|F1QEF3|F1QEF3_DANRE SNF-related kinase b OS=Danio rerio OX=7955 GN=snrkb PE=4 SV=1	1.3	82.015	741	880170	1281800	1265600	1437900	1313100	1157700	1298500	1633600
F1QEQ3;Q9I9N0	4;4		dap1b	tr|F1QEQ3|F1QEQ3_DANRE Death-associated protein 1b OS=Danio rerio OX=7955 GN=dap1b PE=1 SV=3;tr|Q9I9N0|Q9I9N0_DANRE Dap1b OS=Danio rerio OX=7955 GN=dap1b PE=1 SV=1	43.3	10.1	90;109	21323000	33208000	17084000	19948000	4126500	3702300	1073700	1574600
F1QF15;Q7SXW6;Q56A35;F1QLV9	3;3;2;1	Actin-related protein 2-A;Actin-related protein 2-B	actr2a;actr2b	tr|F1QF15|F1QF15_DANRE Actin-related protein 2 OS=Danio rerio OX=7955 GN=actr2a PE=1 SV=1;sp|Q7SXW6|ARP2A_DANRE Actin-related protein 2-A OS=Danio rerio OX=7955 GN=actr2a PE=2 SV=1;sp|Q56A35|ARP2B_DANRE Actin-related protein 2-B OS=Danio rerio OX=7955 GN=a	9.9	44.693	394;394;394;245	2407400	1216000	0	0	0	0	0	98784
F1QVW1;F1QFL1	1;1		mars	tr|F1QVW1|F1QVW1_DANRE Methionine--tRNA ligase, cytoplasmic OS=Danio rerio OX=7955 GN=mars1 PE=1 SV=1;tr|F1QFL1|F1QFL1_DANRE Methionine--tRNA ligase, cytoplasmic OS=Danio rerio OX=7955 GN=mars1 PE=1 SV=1	1.6	105.82	942;951	392040	147390	25121	0	66062	72085	37699	80814
F1QFV2;F1QS20	4;3		hnrnpa1b	tr|F1QFV2|F1QFV2_DANRE Heterogeneous nuclear ribonucleoprotein A1b OS=Danio rerio OX=7955 GN=hnrnpa1b PE=1 SV=1;tr|F1QS20|F1QS20_DANRE Heterogeneous nuclear ribonucleoprotein A1b (Fragment) OS=Danio rerio OX=7955 GN=hnrnpa1b PE=1 SV=1	13.4	40.529	403;281	539300	308840	1617300	550310	1588800	2404800	4400200	3337600
F1QFV6;A0A286YBP4	12;11		rpl28	tr|F1QFV6|F1QFV6_DANRE 60S ribosomal protein L28 OS=Danio rerio OX=7955 GN=rpl28 PE=1 SV=1;tr|A0A286YBP4|A0A286YBP4_DANRE 60S ribosomal protein L28 OS=Danio rerio OX=7955 GN=rpl28 PE=1 SV=1	53.6	15.625	138;151	437570000	677860000	889110000	736710000	609510000	969550000	1233400000	1494900000
F1QG80	6		rpl22	tr|F1QG80|F1QG80_DANRE Ribosomal protein L22 OS=Danio rerio OX=7955 GN=rpl22 PE=1 SV=1	47.5	16.289	141	626170000	834180000	677850000	794260000	795210000	766180000	952610000	874140000
F1QGI2	6		sec63	tr|F1QGI2|F1QGI2_DANRE SEC63 homolog, protein translocation regulator OS=Danio rerio OX=7955 GN=sec63 PE=1 SV=1	8.8	86.464	751	456300	355450	638390	737720	1796100	2530900	4233500	6328800
F1QGN5;Q6DRP2	7;6	Guanine nucleotide-binding protein-like 3	gnl3	tr|F1QGN5|F1QGN5_DANRE Guanine nucleotide-binding protein-like 3 OS=Danio rerio OX=7955 GN=gnl3 PE=1 SV=1;sp|Q6DRP2|GNL3_DANRE Guanine nucleotide-binding protein-like 3 OS=Danio rerio OX=7955 GN=gnl3 PE=2 SV=1	21.2	62.915	561;561	2457400	4279100	3477000	2631400	6055400	4926900	11078000	15219000
F1QHJ1;Q6P6E2	7;6		rps26l;rps26	tr|F1QHJ1|F1QHJ1_DANRE 40S ribosomal protein S26 OS=Danio rerio OX=7955 GN=rps26l PE=3 SV=1;tr|Q6P6E2|Q6P6E2_DANRE 40S ribosomal protein S26 OS=Danio rerio OX=7955 GN=rps26 PE=2 SV=1	58.3	13.021	115;115	179850000	78066000	258150000	30394000	307400000	120920000	390610000	501030000
F1QHJ4;A0A2R8QI65	4;1		dap	tr|F1QHJ4|F1QHJ4_DANRE Death-associated protein OS=Danio rerio OX=7955 GN=dap PE=1 SV=1	37.1	11.393	105;64	1536000	7670600	4389400	4806500	1525400	1215300	684850	1281800
F1QII8;Q567V6	3;3	Eukaryotic translation initiation factor 3 subunit K	eif3k	tr|F1QII8|F1QII8_DANRE Eukaryotic translation initiation factor 3 subunit K OS=Danio rerio OX=7955 GN=eif3k PE=1 SV=1;sp|Q567V6|EIF3K_DANRE Eukaryotic translation initiation factor 3 subunit K OS=Danio rerio OX=7955 GN=eif3k PE=2 SV=1	19.6	25.411	219;219	942710	1811100	1691200	1407300	2306000	3207700	3370700	2221500
F1QJT6;Q7ZW47;A0A2R8RW72;A0A2R8QLS8	17;17;15;12	Double-stranded RNA-binding protein Staufen homolog 2	stau2	tr|F1QJT6|F1QJT6_DANRE Double-stranded RNA-binding protein Staufen homolog 2 OS=Danio rerio OX=7955 GN=stau2 PE=1 SV=1;sp|Q7ZW47|STAU2_DANRE Double-stranded RNA-binding protein Staufen homolog 2 OS=Danio rerio OX=7955 GN=stau2 PE=2 SV=2;tr|A0A2R8RW72|A0A2R	33.3	73.394	678;606;566;292	10565000	17313000	22727000	27414000	27825000	27832000	15256000	18585000
F1QK60;A0A2R8Q0V6;A9JRS6;CON__P05787;F1RDG4;A0A2R8QF11;A8KBU6	25;24;24;5;3;2;2		krt4	tr|F1QK60|F1QK60_DANRE Keratin 4 OS=Danio rerio OX=7955 GN=krt4 PE=1 SV=1;tr|A0A2R8Q0V6|A0A2R8Q0V6_DANRE Keratin 4 OS=Danio rerio OX=7955 GN=krt4 PE=1 SV=1;tr|A9JRS6|A9JRS6_DANRE Keratin 4 OS=Danio rerio OX=7955 GN=krt4 PE=1 SV=1	46.5	53.997	497;495;497;483;438;475;486	235500	141030	2058000	1253200	32034000	13729000	42523000	62643000
F1QKI4;Q7ZUH1	2;2	UPF0568 protein C14orf166 homolog	zgc:56576	tr|F1QKI4|F1QKI4_DANRE RNA transcription, translation and transport factor protein OS=Danio rerio OX=7955 GN=rtraf PE=1 SV=1;sp|Q7ZUH1|RTRAF_DANRE RNA transcription, translation and transport factor protein OS=Danio rerio OX=7955 GN=rtraf PE=2 SV=1	11.2	27.871	242;242	85307	99060	344580	306280	553290	1257400	392100	644000
F1QKV8	1		actr3b	tr|F1QKV8|F1QKV8_DANRE Actin-related protein 3B (Fragment) OS=Danio rerio OX=7955 GN=actr3b PE=1 SV=1	2.1	48.307	425	1147000	890460	13445	0	0	0	0	0
Q1LVW4;F1QL37;H0WF65;H0WEG6;H0WEG1;H0WEB6	8;8;8;8;8;8		si:dkeyp-98a7.3;si:ch211-250e5.9	tr|Q1LVW4|Q1LVW4_DANRE MGC171851 protein OS=Danio rerio OX=7955 GN=si:dkeyp-98a7.4 PE=2 SV=1;tr|F1QL37|F1QL37_DANRE Si:dkeyp-98a7.4 (Fragment) OS=Danio rerio OX=7955 GN=si:dkeyp-98a7.4 PE=4 SV=1;tr|H0WF65|H0WF65_DANRE Si:dkeyp-98a7.4 (Fragment) OS=Danio re	60.2	14.817	128;131;136;136;136;136	1296400000	2156500000	1595100000	1936400000	1455100000	1114400000	825600000	944830000
Q7ZTS8;F1QM02;E9QCY7;Q9PTK4;A0A2R8QLQ0;A0A2R8Q8X4;A0A2R8QTX4;A0A0R4IUM0;A0A0R4IU28;A0A0R4INX8;A0A0R4IJL9	7;7;3;2;2;2;2;1;1;1;1	ELAV-like protein	elavl1	tr|Q7ZTS8|Q7ZTS8_DANRE ELAV-like protein OS=Danio rerio OX=7955 GN=elavl1a PE=1 SV=1;tr|F1QM02|F1QM02_DANRE ELAV-like protein OS=Danio rerio OX=7955 GN=elavl1a PE=1 SV=1	25.3	35.936	324;340;105;322;339;359;360;71;72;92;93	42573	808890	2444600	3809300	7558900	8754900	4984300	7672300
F1QMM7	1		atr	tr|F1QMM7|F1QMM7_DANRE Non-specific serine/threonine protein kinase OS=Danio rerio OX=7955 GN=atr PE=1 SV=2	0.3	298.32	2635	617370	0	0	0	0	0	0	0
Q6DGL0;F1QN76;E9QF69	8;8;7	60S ribosomal protein L18	rpl18	tr|Q6DGL0|Q6DGL0_DANRE Ribosomal protein L18 OS=Danio rerio OX=7955 GN=rpl18 PE=1 SV=1;tr|F1QN76|F1QN76_DANRE Ribosomal protein L18 (Fragment) OS=Danio rerio OX=7955 GN=rpl18 PE=1 SV=1;tr|E9QF69|E9QF69_DANRE Ribosomal protein L18 OS=Danio rerio OX=7955 GN=	39.6	20.993	182;166;164	50349000	127400000	107430000	131450000	113330000	138090000	125110000	216130000
F1RDZ7;F1QPD8	1;1		numb	tr|F1RDZ7|F1RDZ7_DANRE Protein numb homolog OS=Danio rerio OX=7955 GN=numb PE=4 SV=1;tr|F1QPD8|F1QPD8_DANRE Protein numb homolog OS=Danio rerio OX=7955 GN=numb PE=4 SV=1	1.8	71.652	669;680	0	3151700	3462000	3454000	4030100	2891300	3566300	0
F1QQZ1	2		sf3b1	tr|F1QQZ1|F1QQZ1_DANRE Splicing factor 3b, subunit 1 OS=Danio rerio OX=7955 GN=sf3b1 PE=1 SV=2	2.4	147.18	1315	88025	231870	261040	140810	610520	0	709450	402650
F1QRC1	1	Dynein regulatory complex protein 1	drc1	sp|F1QRC1|DRC1_DANRE Dynein regulatory complex protein 1 OS=Danio rerio OX=7955 GN=drc1 PE=2 SV=1	1.9	78.176	670	3956100	0	2607200	2679200	2130700	1340500	2309800	4164400
F1QRM9	3		npepps	tr|F1QRM9|F1QRM9_DANRE Aminopeptidase OS=Danio rerio OX=7955 GN=npepps PE=1 SV=1	3.7	103.92	925	884930	921840	0	0	0	0	0	0
F1QRX2;Q6NV25;Q6DI05;Q6DHL4	1;1;1;1	Small ubiquitin-related modifier;Small ubiquitin-related modifier 3-like;Small ubiquitin-related modifier 3;Small ubiquitin-related modifier 2	sumo3b;sumo3l;sumo3;sumo2	tr|F1QRX2|F1QRX2_DANRE Small ubiquitin-related modifier OS=Danio rerio OX=7955 GN=sumo3b PE=3 SV=1;sp|Q6NV25|SMO3L_DANRE Small ubiquitin-related modifier 3-like OS=Danio rerio OX=7955 GN=sumo3l PE=3 SV=1;sp|Q6DI05|SUMO3_DANRE Small ubiquitin-related modifi	12.8	10.697	94;94;94;96	729820	361020	267680	286060	434950	275450	389100	498210
F1QTS9	11		mrto4	tr|F1QTS9|F1QTS9_DANRE Ribosome assembly factor mrt4 OS=Danio rerio OX=7955 GN=mrto4 PE=1 SV=1	54.1	27.735	242	5527600	6383800	8194600	7152400	14383000	15247000	33018000	41033000
F1QU13	1		alpk2	sp|F1QU13|ALPK2_DANRE Alpha-protein kinase 2 OS=Danio rerio OX=7955 GN=alpk2 PE=2 SV=2	0.9	217.13	1966	35374000	63455000	65407000	55253000	73083000	48119000	41016000	54296000
F1QU59	18		znf622	tr|F1QU59|F1QU59_DANRE Zinc finger protein 622 OS=Danio rerio OX=7955 GN=znf622 PE=1 SV=1	40.6	51.72	453	20859000	35006000	49788000	38958000	55395000	48740000	51034000	90276000
F1QUG5;Q6PFQ2	12;12	Eukaryotic translation initiation factor 3 subunit C	eif3c	tr|F1QUG5|F1QUG5_DANRE Eukaryotic translation initiation factor 3 subunit C OS=Danio rerio OX=7955 GN=eif3c PE=1 SV=1;sp|Q6PFQ2|EIF3C_DANRE Eukaryotic translation initiation factor 3 subunit C OS=Danio rerio OX=7955 GN=eif3c PE=1 SV=1	14.8	106.42	926;926	1925800	2439500	4058400	4175900	9333000	6994100	4310700	3956900
Q9I8V1;Q6XNL8;Q6IQR3;Q6IQL9;Q6DHS1;F1QUN8;F8W3L1;A0A2R8RJJ2	13;13;13;13;13;13;10;7		actc1b;acta1b;actc1a;acta2;acta1a	tr|Q9I8V1|Q9I8V1_DANRE Actin alpha cardiac muscle 1b OS=Danio rerio OX=7955 GN=actc1b PE=2 SV=1;tr|Q6XNL8|Q6XNL8_DANRE Actin OS=Danio rerio OX=7955 GN=acta1b PE=1 SV=1;tr|Q6IQR3|Q6IQR3_DANRE Actin alpha cardiac muscle 1a OS=Danio rerio OX=7955 GN=actc1a PE	39.8	41.972	377;377;377;377;377;377;334;148	171700000	74194000	5665000	3311000	4673200	5869000	32820000	71784000
F8W4M8;F1QUV8;F1QTT3;A0A2R8QDB8	3;3;1;1		jupb	tr|F8W4M8|F8W4M8_DANRE Junction plakoglobin (Fragment) OS=Danio rerio OX=7955 GN=jupb PE=3 SV=2;tr|F1QUV8|F1QUV8_DANRE Junction plakoglobin OS=Danio rerio OX=7955 GN=jupb PE=3 SV=3	5.2	72.822	667;726;729;729	14822000	1206300	81525	0	68578	33788	33282	89345
F1QV31;F1R5A5;E9QBD7	19;19;17		krt5	tr|F1QV31|F1QV31_DANRE Keratin 5 OS=Danio rerio OX=7955 GN=krt5 PE=1 SV=1;tr|F1R5A5|F1R5A5_DANRE Keratin 5 OS=Danio rerio OX=7955 GN=krt5 PE=1 SV=2;tr|E9QBD7|E9QBD7_DANRE Keratin 5 (Fragment) OS=Danio rerio OX=7955 GN=krt5 PE=1 SV=1	30.6	59.177	566;560;226	0	0	612840	492690	9595300	3734800	8346100	9267400
F1QWP7	3		nop2	tr|F1QWP7|F1QWP7_DANRE NOP2 nucleolar protein homolog (yeast) OS=Danio rerio OX=7955 GN=nop2 PE=1 SV=1	5.5	83.53	739	339120	980080	242890	309800	1344900	1361800	2763900	3360100
F1QXV8	4	Phosphoglycerate kinase	pgk1	tr|F1QXV8|F1QXV8_DANRE Phosphoglycerate kinase OS=Danio rerio OX=7955 GN=pgk1 PE=1 SV=1	11.3	44.732	417	15143000	4478400	209020	268530	204390	220240	305010	196420
F1QY35	1		zgc:171779	tr|F1QY35|F1QY35_DANRE Zona pellucida sperm-binding protein 3 OS=Danio rerio OX=7955 GN=zp3e PE=1 SV=1	2.7	48.073	437	236440	680880	644750	1911300	542620	258590	0	87884
Q6NUZ3;F1QY96;F6NN54;A0A0R4IHN8;R4GF20;Q6NYJ5;A0A0R4ITI5;A0A0R4IHZ5	3;3;2;1;1;1;1;1		syncrip	tr|Q6NUZ3|Q6NUZ3_DANRE Synaptotagmin-binding, cytoplasmic RNA-interacting protein OS=Danio rerio OX=7955 GN=syncrip PE=1 SV=1;tr|F1QY96|F1QY96_DANRE Synaptotagmin-binding, cytoplasmic RNA-interacting protein OS=Danio rerio OX=7955 GN=syncrip PE=1 SV=2;tr|F	6	69.962	630;632;238;159;225;560;631;637	0	278750	344610	541910	838850	945100	935490	887130
F1QYI8;E9QD71;E9QGV1;X1WE90	10;9;6;2		dusp12	tr|F1QYI8|F1QYI8_DANRE Protein-tyrosine-phosphatase OS=Danio rerio OX=7955 GN=dusp12 PE=1 SV=1;tr|E9QD71|E9QD71_DANRE Protein-tyrosine-phosphatase (Fragment) OS=Danio rerio OX=7955 GN=dusp12 PE=1 SV=1;tr|E9QGV1|E9QGV1_DANRE Dual-specificity phosphatase 12	50.8	33.912	305;291;236;120	7500200	18023000	6277300	12309000	2039100	3474100	743290	1606100
F1QZ83;F1QL42	2;1		ubtf	tr|F1QZ83|F1QZ83_DANRE Upstream-binding transcription factor OS=Danio rerio OX=7955 GN=ubtf PE=1 SV=1;tr|F1QL42|F1QL42_DANRE Upstream-binding transcription factor (Fragment) OS=Danio rerio OX=7955 GN=ubtf PE=1 SV=1	3.9	85.887	735;447	0	0	223350	0	556240	327420	665530	587750
F1QZQ0	2		ttna	tr|F1QZQ0|F1QZQ0_DANRE Titin, tandem duplicate 2 (Fragment) OS=Danio rerio OX=7955 GN=ttn.2 PE=1 SV=1	0.1	2453.3	22089	0	0	0	0	0	0	180170	2977400
F1QZW1;F1QSE1;A0A2R8QM44;A0A2R8Q4Q8;A0A2R8QK05;A0A0N4SU68;B6IDE1;A0A0G2L6C1;A0A2R8QGS1;A0A0G2L365;A0A2R8Q9I2;A0A2R8Q9M0;A0A0N4STT5	5;3;3;2;2;2;2;2;2;2;2;2;2		vmhc;vmhcl	tr|F1QZW1|F1QZW1_DANRE Myosin heavy chain 7 OS=Danio rerio OX=7955 GN=myh7 PE=1 SV=1;tr|F1QSE1|F1QSE1_DANRE Myosin heavy chain 7-like OS=Danio rerio OX=7955 GN=myh7l PE=1 SV=1;tr|A0A2R8QM44|A0A2R8QM44_DANRE Myosin heavy chain 7-like OS=Danio rerio OX=7955	4.5	223.23	1938;1936;1963;1934;1938;1938;1939;1939;1940;1946;1952;1969;2008	0	0	0	0	0	0	1217900	2782900
F1R0U5	5		larp1	tr|F1R0U5|F1R0U5_DANRE La ribonucleoprotein 1, translational regulator OS=Danio rerio OX=7955 GN=larp1 PE=1 SV=2	7.1	110.56	969	605840	693260	535350	1500900	2236900	2760000	3061400	4198100
F1R184	7		txndc5	tr|F1R184|F1R184_DANRE Thioredoxin domain-containing 5 OS=Danio rerio OX=7955 GN=txndc5 PE=1 SV=1	19.9	46.158	403	3342600	5107100	4210000	6704600	6774100	5977500	5357900	9532900
F1R1S7	3		zgc:171776	tr|F1R1S7|F1R1S7_DANRE Zgc:171776 OS=Danio rerio OX=7955 GN=zgc:171776 PE=1 SV=1	11.9	25.527	219	1052400	1452000	3316200	2070400	1390300	2084000	706610	890970
F1R2I7	1		LOC555713	tr|F1R2I7|F1R2I7_DANRE NBR1 autophagy cargo receptor b OS=Danio rerio OX=7955 GN=nbr1b PE=4 SV=2	0.9	107.85	992	13336000	2464500	0	0	0	0	0	0
F1R3T3;F1R2L8	2;2		ddx1	tr|F1R3T3|F1R3T3_DANRE ATP-dependent RNA helicase DDX1 OS=Danio rerio OX=7955 GN=ddx1 PE=1 SV=2;tr|F1R2L8|F1R2L8_DANRE ATP-dependent RNA helicase DDX1 OS=Danio rerio OX=7955 GN=ddx1 PE=1 SV=1	3.7	81.806	734;740	0	0	115630	152240	570720	537440	295030	284340
F1R2S5;A0A2R8PZ72;A0A2R8Q5K5;A0A2R8QHD5	46;45;45;10		vtg5	tr|F1R2S5|F1R2S5_DANRE Phosvitin (Fragment) OS=Danio rerio OX=7955 GN=vtg5 PE=1 SV=1;tr|A0A2R8PZ72|A0A2R8PZ72_DANRE Phosvitin OS=Danio rerio OX=7955 GN=vtg5 PE=1 SV=1;tr|A0A2R8Q5K5|A0A2R8Q5K5_DANRE Phosvitin OS=Danio rerio OX=7955 GN=vtg5 PE=1 SV=1	34.8	149.26	1363;1269;1324;310	439970	359430	846960	1337800	1963700	1425700	1876200	3134900
I3ISA3;F1R3G4	2;2		myh10	tr|I3ISA3|I3ISA3_DANRE Myosin, heavy chain 10, non-muscle OS=Danio rerio OX=7955 GN=myh10 PE=1 SV=1;tr|F1R3G4|F1R3G4_DANRE Myosin, heavy chain 10, non-muscle OS=Danio rerio OX=7955 GN=myh10 PE=1 SV=1	1.4	230.45	1986;1992	1308600	165310	0	0	0	15350	38321	55811
F1R4K1;Q6NW90;Q6PE34	10;9;6		tubb4b;tubb5;zgc:65894	tr|F1R4K1|F1R4K1_DANRE Tubulin beta chain OS=Danio rerio OX=7955 GN=tubb4bl PE=1 SV=1;tr|Q6NW90|Q6NW90_DANRE Tubulin beta chain OS=Danio rerio OX=7955 GN=tubb5 PE=1 SV=1;tr|Q6PE34|Q6PE34_DANRE Tubulin beta chain OS=Danio rerio OX=7955 GN=zgc:65894 PE=1 SV=	36	49.646	444;444;444	30866000	4437400	2265100	40329	1992500	1626400	5329100	3509900
F1R8M8	4		si:dkey-16i5.10	tr|F1R8M8|F1R8M8_DANRE Ribosomal L1 domain-containing 1 OS=Danio rerio OX=7955 GN=rsl1d1 PE=1 SV=2	16.1	42.261	373	938420	703940	418330	332280	2006400	1919100	2098800	2898000
F1R8W4;F1R8W3;F1QK59;A0A2R8PYZ9	7;7;2;2		desma	tr|F1R8W4|F1R8W4_DANRE Desmin a OS=Danio rerio OX=7955 GN=desma PE=1 SV=1;tr|F1R8W3|F1R8W3_DANRE Desmin a OS=Danio rerio OX=7955 GN=desma PE=1 SV=1	18.4	54.149	473;488;473;474	0	0	0	0	0	0	5221500	8392800
F1R9G6;Q7ZVC4	2;2	Charged multivesicular body protein 4b	chmp4ba;chmp4b	tr|F1R9G6|F1R9G6_DANRE Charged multivesicular body protein 4Ba OS=Danio rerio OX=7955 GN=chmp4ba PE=1 SV=1;sp|Q7ZVC4|CHM4B_DANRE Charged multivesicular body protein 4b OS=Danio rerio OX=7955 GN=chmp4b PE=2 SV=1	13.6	24.784	220;220	0	0	0	194270	262490	184780	0	0
F1R9V3;R4GEU2	14;4		si:dkey-4p15.3	tr|F1R9V3|F1R9V3_DANRE Heat shock protein family A (Hsp70) member 8b OS=Danio rerio OX=7955 GN=hspa8b PE=1 SV=1	20.7	71.093	647;160	6799600	2258100	300390	327370	394940	59206	384330	407980
F1RAE8;Q58EE9	4;4	Glial fibrillary acidic protein	gfap	tr|F1RAE8|F1RAE8_DANRE Glial fibrillary acidic protein OS=Danio rerio OX=7955 GN=gfap PE=1 SV=1;sp|Q58EE9|GFAP_DANRE Glial fibrillary acidic protein OS=Danio rerio OX=7955 GN=gfap PE=1 SV=2	11.9	51.263	444;444	0	0	7225.9	0	0	0	1960000	1501700
Q1LYG6;F1RBB9;Q501T8	6;6;1		eef2a.2	tr|Q1LYG6|Q1LYG6_DANRE Eukaryotic translation elongation factor 2a, tandem duplicate 2 OS=Danio rerio OX=7955 GN=eef2a.2 PE=3 SV=1;tr|F1RBB9|F1RBB9_DANRE Eukaryotic translation elongation factor 2a, tandem duplicate 2 OS=Danio rerio OX=7955 GN=eef2a.2 PE=3	10.1	95.075	853;847;160	239840000	344420000	375910000	4587700	335940000	5385000	480820000	5589700
F1RBS6	1	Nucleoside diphosphate kinase	nme2b.2	tr|F1RBS6|F1RBS6_DANRE Nucleoside diphosphate kinase OS=Danio rerio OX=7955 GN=nme2b.1 PE=1 SV=1	11.1	17.262	153	3158100	0	0	0	0	0	185580	0
F1RCB2;B0S6P6;X1WFB0	4;3;1		pl10;ddx3	tr|F1RCB2|F1RCB2_DANRE RNA helicase OS=Danio rerio OX=7955 GN=ddx3xb PE=1 SV=1;tr|B0S6P6|B0S6P6_DANRE RNA helicase OS=Danio rerio OX=7955 GN=ddx3xa PE=1 SV=1	7	75.831	688;709;296	3416800	0	179040	369460	305040	426820	248530	542420
F1RCY6;A0A0R4IY20	21;3		upf1	tr|F1RCY6|F1RCY6_DANRE UPF1 RNA helicase and ATPase OS=Danio rerio OX=7955 GN=upf1 PE=1 SV=1	27.7	122.08	1100;393	3072100	4579600	7188100	6956500	21058000	20068000	15054000	18044000
F1RDC1;Q6NW76	1;1	Aurora kinase B	aurkb	tr|F1RDC1|F1RDC1_DANRE Aurora kinase OS=Danio rerio OX=7955 GN=aurkb PE=1 SV=2;sp|Q6NW76|AURKB_DANRE Aurora kinase B OS=Danio rerio OX=7955 GN=aurkb PE=2 SV=1	4.7	36.899	320;320	460100	955680	324550	0	550720	394140	248360	222740
F1RE30	2			tr|F1RE30|F1RE30_DANRE Modulator of non-genomic activity of estrogen receptor OS=Danio rerio OX=7955 GN=pelp1 PE=1 SV=2	2.1	131.06	1212	0	34900	163340	350830	336640	496130	276000	148090
Q641M4;Q7T2C6;F6NJU6;Q6GQM5;A0A2R8QIZ9	3;3;3;2;1		zgc:100918;rab7;zgc:91909	tr|Q641M4|Q641M4_DANRE Zgc:100918 OS=Danio rerio OX=7955 GN=zgc:100918 PE=1 SV=1;tr|Q7T2C6|Q7T2C6_DANRE RAB7, member RAS oncogene family OS=Danio rerio OX=7955 GN=rab7a PE=1 SV=1;tr|F6NJU6|F6NJU6_DANRE Zgc:100918 OS=Danio rerio OX=7955 GN=zgc:100918 PE=1 S	18	23.161	205;207;208;204;131	1834200	319660	0	0	0	0	0	34419
F6NZP4	2		esyt1b	tr|F6NZP4|F6NZP4_DANRE Extended synaptotagmin-like protein 1b OS=Danio rerio OX=7955 GN=esyt1b PE=1 SV=1	1.4	175.08	1558	0	0	0	0	0	0	0	0
F8W3L6;A0A2R8QQT1	4;2		myh9a	tr|F8W3L6|F8W3L6_DANRE Myosin, heavy chain 9a, non-muscle (Fragment) OS=Danio rerio OX=7955 GN=myh9a PE=1 SV=1;tr|A0A2R8QQT1|A0A2R8QQT1_DANRE Myosin, heavy chain 9a, non-muscle OS=Danio rerio OX=7955 GN=myh9a PE=1 SV=1	2.6	227.61	1964;950	1898200	222150	0	0	0	0	378810	490970
G1K2N0;Q6PBI5	8;8	40S ribosomal protein S25	rps25	tr|G1K2N0|G1K2N0_DANRE 40S ribosomal protein S25 OS=Danio rerio OX=7955 GN=rps25 PE=1 SV=1;sp|Q6PBI5|RS25_DANRE 40S ribosomal protein S25 OS=Danio rerio OX=7955 GN=rps25 PE=2 SV=1	41.7	14.655	132;124	576100000	999600000	609500000	1007700000	867770000	847970000	938440000	1102900000
H0WE76	1		si:dkey-199m13.3	tr|H0WE76|H0WE76_DANRE Zinc finger protein 1052 OS=Danio rerio OX=7955 GN=znf1052 PE=4 SV=1	2.9	48.772	419	0	0	356200	373750	557490	641550	231540	394580
H0WED7	8		si:dkeyp-98a7.8	tr|H0WED7|H0WED7_DANRE Si:dkeyp-98a7.8 (Fragment) OS=Danio rerio OX=7955 GN=si:dkeyp-98a7.8 PE=1 SV=1	47.8	15.618	136	1228600000	1768200000	9389100	1592400000	1207200000	947850000	890470000	862240000
H0WF77;Q5RHT8;Q5RHT9	1;1;1		net1	tr|H0WF77|H0WF77_DANRE Neuroepithelial cell-transforming 1 (Fragment) OS=Danio rerio OX=7955 GN=net1 PE=4 SV=1;tr|Q5RHT8|Q5RHT8_DANRE Neuroepithelial cell-transforming 1 OS=Danio rerio OX=7955 GN=net1 PE=4 SV=1;tr|Q5RHT9|Q5RHT9_DANRE Neuroepithelial cell-t	2.4	33.545	294;551;580	117680000	248100000	168750000	205610000	204820000	204920000	256310000	274090000
H9GX78;Q7SYE2;A0A2R8QDC7;A0A2R8Q1V1;F1RAJ3	14;12;12;1;1		actn4	tr|H9GX78|H9GX78_DANRE Actinin, alpha 4 OS=Danio rerio OX=7955 GN=actn4 PE=1 SV=2;tr|Q7SYE2|Q7SYE2_DANRE Actinin, alpha 4 OS=Danio rerio OX=7955 GN=actn4 PE=1 SV=1;tr|A0A2R8QDC7|A0A2R8QDC7_DANRE Actinin, alpha 4 OS=Danio rerio OX=7955 GN=actn4 PE=1 SV=1	19.5	103.78	901;901;923;595;1226	20357000	8573600	52354	84289	267250	244530	1090800	1567700
I3ISA6	8		eppk1	tr|I3ISA6|I3ISA6_DANRE Epiplakin 1 OS=Danio rerio OX=7955 GN=eppk1 PE=1 SV=1	7.5	611.71	5476	0	0	104710	37618	6482300	2092500	545850	776170
I3ISU7	1		si:ch1073-263o8.2	tr|I3ISU7|I3ISU7_DANRE Si:ch1073-263o8.2 OS=Danio rerio OX=7955 GN=si:ch1073-263o8.2 PE=1 SV=1	0.9	140.9	1340	3130300	7116900	7724800	26229000	4832400	3758800	872190	855010
O42248;A0A0R4IJ56	22;5	Guanine nucleotide-binding protein subunit beta-2-like 1	gnb2l1	sp|O42248|GBLP_DANRE Guanine nucleotide-binding protein subunit beta-2-like 1 OS=Danio rerio OX=7955 GN=gnb2l1 PE=2 SV=1	86.8	35.122	317;58	2450200000	3292300000	2637500000	3076700000	2787500000	3193400000	3775100000	3657400000
O42363	2	Apolipoprotein A-I;Proapolipoprotein A-I	apoa1	sp|O42363|APOA1_DANRE Apolipoprotein A-I OS=Danio rerio OX=7955 GN=apoa1 PE=1 SV=1	9.5	30.256	262	0	34862	0	0	506560	540910	325990	1207400
O57521	7	Heat shock protein HSP 90-beta	hsp90ab1	sp|O57521|HS90B_DANRE Heat shock protein HSP 90-beta OS=Danio rerio OX=7955 GN=hsp90ab1 PE=1 SV=2	11.4	83.356	725	0	0	0	0	337000	529680	732190	606590
P62084	15	40S ribosomal protein S7	rps7	sp|P62084|RS7_DANRE 40S ribosomal protein S7 OS=Danio rerio OX=7955 GN=rps7 PE=2 SV=1	60.3	22.25	194	861400000	1423900000	1643400000	1064400000	1245900000	2111700000	1426100000	1605500000
P62247	14	40S ribosomal protein S8	rps8	sp|P62247|RS8_DANRE 40S ribosomal protein S8 OS=Danio rerio OX=7955 GN=rps8 PE=2 SV=2	57.2	24.093	208	372680000	378280000	346930000	401300000	462490000	433090000	472720000	544270000
P79735	3	GTP-binding nuclear protein Ran	ran	sp|P79735|RAN_DANRE GTP-binding nuclear protein Ran OS=Danio rerio OX=7955 GN=ran PE=2 SV=1	15.8	24.46	215	4754400	1366600	433510	550290	934150	851540	265490	944180
P79741	4	Pescadillo	pes	sp|P79741|PESC_DANRE Pescadillo OS=Danio rerio OX=7955 GN=pes PE=2 SV=2	8.1	67.898	583	1277300	1895300	596470	940100	2966500	2473100	4417900	10085000
Q08BA1	3	ATP synthase subunit alpha	atp5a1	tr|Q08BA1|Q08BA1_DANRE ATP synthase subunit alpha OS=Danio rerio OX=7955 GN=atp5fa1 PE=1 SV=1	6.5	59.743	551	3785500	397380	64406	289100	317200	179220	649360	3070000
Q08C78	1	Transcription factor BTF3	btf3	tr|Q08C78|Q08C78_DANRE Transcription factor BTF3 OS=Danio rerio OX=7955 GN=btf3 PE=1 SV=1	11.7	17.597	162	139360	136150	91430	65805	320550	246330	521840	373270
Q0VFW0	2		rpl22l1	tr|Q0VFW0|Q0VFW0_DANRE Ribosomal protein L22-like 1 OS=Danio rerio OX=7955 GN=rpl22l1 PE=1 SV=1	28.6	14.766	126	5024200	5589800	342960	1024200	9547600	700620	37643000	29259000
Q1L9A1	4		hnrnpul1	tr|Q1L9A1|Q1L9A1_DANRE Heterogeneous nuclear ribonucleoprotein U-like 1 OS=Danio rerio OX=7955 GN=hnrnpul1 PE=1 SV=1	7	88.961	784	1197200	1655100	1043500	1097600	2650700	1960200	5312100	4055300
Q8AWD9;Q1L9E4	1;1		ctsd	tr|Q8AWD9|Q8AWD9_DANRE Cathepsin D OS=Danio rerio OX=7955 GN=ctsd PE=1 SV=1;tr|Q1L9E4|Q1L9E4_DANRE Cathepsin D OS=Danio rerio OX=7955 GN=ctsd PE=1 SV=1	2.8	43.199	398;398	1280800	1895900	49404	0	0	0	0	0
Q1LVE8	8	Splicing factor 3B subunit 3	sf3b3	sp|Q1LVE8|SF3B3_DANRE Splicing factor 3B subunit 3 OS=Danio rerio OX=7955 GN=sf3b3 PE=2 SV=1	8	135.62	1217	757760	749750	1547300	1141400	2858100	2659000	4729800	5323800
Q1LVF0	5	Laminin subunit gamma-1	lamc1	sp|Q1LVF0|LAMC1_DANRE Laminin subunit gamma-1 OS=Danio rerio OX=7955 GN=lamc1 PE=2 SV=2	5.1	176.2	1593	0	19018	40412	34603	2573000	2162700	3180100	3518000
Q5U3E1;Q1LVZ0;Q6DGU2;Q1LVZ1;F1RDZ1	5;5;4;3;3		rab11a;rab11ba;rab11bb;rab11al	tr|Q5U3E1|Q5U3E1_DANRE Novel protein similar to vertebrate Ras family OS=Danio rerio OX=7955 GN=rab11a PE=1 SV=1;tr|Q1LVZ0|Q1LVZ0_DANRE RAB11B, member RAS oncogene family, a OS=Danio rerio OX=7955 GN=rab11ba PE=1 SV=1;tr|Q6DGU2|Q6DGU2_DANRE RAB11B, member	23.7	24.311	215;218;218;205;216	5459000	1827000	40663	85528	90111	79706	85137	89146
Q1LWH1	14		rps16	tr|Q1LWH1|Q1LWH1_DANRE Ribosomal protein S16 OS=Danio rerio OX=7955 GN=rps16 PE=1 SV=1	73.3	16.356	146	648370000	1122200000	1281700000	1311000000	1145300000	670620000	1460400000	1372700000
Q1LWN2;A0A2R8Q212;A0A2R8QEH1;A0A2R8QIV8	55;53;11;7		vtg1	tr|Q1LWN2|Q1LWN2_DANRE Phosvitin OS=Danio rerio OX=7955 GN=vtg1 PE=1 SV=1;tr|A0A2R8Q212|A0A2R8Q212_DANRE Phosvitin OS=Danio rerio OX=7955 GN=vtg1 PE=1 SV=1	44.2	149.23	1362;1338;317;260	21540000	30860000	28307000	26375000	47166000	53026000	47039000	92167000
Q1LXD4;Q6P3H7;E9QC86;F1QT75	2;2;1;1	Histone-binding protein RBBP4	rbbp4;rbb4l	tr|Q1LXD4|Q1LXD4_DANRE Histone-binding protein RBBP4 OS=Danio rerio OX=7955 GN=rbbp4 PE=1 SV=1;sp|Q6P3H7|RBBP4_DANRE Histone-binding protein RBBP4 OS=Danio rerio OX=7955 GN=rbbp4 PE=2 SV=3;tr|E9QC86|E9QC86_DANRE Retinoblastoma-binding protein 4,-like OS=Da	5.7	47.551	424;424;425;426	0	0	369240	618690	1219500	1244200	1441400	2217900
Q1LXR2	1		si:dkeyp-20e4.8	tr|Q1LXR2|Q1LXR2_DANRE Si:dkeyp-20e4.8 OS=Danio rerio OX=7955 GN=si:dkeyp-20e4.8 PE=4 SV=1	14.7	8.219	75	0	0	567350	671540	692410	859630	494230	647200
Q1LYB7	12		rpl13a	tr|Q1LYB7|Q1LYB7_DANRE 60S ribosomal protein L13a OS=Danio rerio OX=7955 GN=rpl13a PE=1 SV=1	37.6	23.677	205	163050000	215650000	243360000	244500000	231890000	240090000	323330000	317180000
Q1LYG5;A0A0R4IIY8	7;6		eef2a.1	tr|Q1LYG5|Q1LYG5_DANRE Eukaryotic translation elongation factor 2a, tandem duplicate 1 OS=Danio rerio OX=7955 GN=eef2a.1 PE=1 SV=2;tr|A0A0R4IIY8|A0A0R4IIY8_DANRE Eukaryotic translation elongation factor 2a, tandem duplicate 1 OS=Danio rerio OX=7955 GN=eef2	10.3	94.977	854;848	510850	3581200	2268800	992650	626870	763600	525080	685320
Q24JV1	11		rpl32	tr|Q24JV1|Q24JV1_DANRE Ribosomal protein L32 OS=Danio rerio OX=7955 GN=rpl32 PE=1 SV=1	54.1	15.813	135	178060000	338290000	268250000	303870000	362770000	338990000	393160000	429400000
Q24JV3	11		rpl31	tr|Q24JV3|Q24JV3_DANRE 60S ribosomal protein L31 OS=Danio rerio OX=7955 GN=rpl31 PE=1 SV=1	55.3	14.338	123	822000000	1114100000	1300300000	1902100000	1113500000	1474200000	1278000000	1572100000
Q3B748	3	Protein LLP homolog	llph	sp|Q3B748|LLPH_DANRE Protein LLP homolog OS=Danio rerio OX=7955 GN=llph PE=2 SV=1	26.2	14.491	126	965680	507620	837440	616220	1223800	2690600	5263900	5807900
Q3B7P7	4		uba52	tr|Q3B7P7|Q3B7P7_DANRE 60S ribosomal protein L40 OS=Danio rerio OX=7955 GN=uba52 PE=2 SV=1	28.1	14.756	128	348070	53049000	54065000	55560000	38728000	49066000	54366000	70599000
Q3S344	1		gfpt1	tr|Q3S344|Q3S344_DANRE Glutamine--fructose-6-phosphate transaminase (isomerizing) OS=Danio rerio OX=7955 GN=gfpt1 PE=1 SV=1	2.1	76.721	682	0	0	119140	0	297420	0	268380	0
Q499A8;Q5RHR0	12;12		parp1	tr|Q499A8|Q499A8_DANRE Poly [ADP-ribose] polymerase OS=Danio rerio OX=7955 GN=parp1 PE=1 SV=1;tr|Q5RHR0|Q5RHR0_DANRE Poly [ADP-ribose] polymerase OS=Danio rerio OX=7955 GN=parp1 PE=1 SV=1	15.4	112.53	1011;1013	98217	0	601950	186790	15838000	10041000	7481100	5421000
Q4VBV2	6	40S ribosomal protein S27	rps27.1	tr|Q4VBV2|Q4VBV2_DANRE 40S ribosomal protein S27 OS=Danio rerio OX=7955 GN=rps27.1 PE=1 SV=1	41.7	9.5311	84	88850000	104170000	101180000	97190000	118090000	116660000	131060000	159670000
Q503P2	2	60S ribosome subunit biogenesis protein NIP7 homolog	nip7	sp|Q503P2|NIP7_DANRE 60S ribosome subunit biogenesis protein NIP7 homolog OS=Danio rerio OX=7955 GN=nip7 PE=2 SV=1	13.3	20.609	180	500170	497610	309190	0	1083900	832530	3462300	1019500
Q567N5	12		rpl6	tr|Q567N5|Q567N5_DANRE 60S ribosomal protein L6 OS=Danio rerio OX=7955 GN=rpl6 PE=1 SV=1	42.3	30.541	265	107120000	238910000	97252000	164780000	193820000	205260000	324960000	423460000
Q568H8	1		polr2h	tr|Q568H8|Q568H8_DANRE DNA-directed RNA polymerases I, II, and III subunit RPABC3 OS=Danio rerio OX=7955 GN=polr2h PE=1 SV=1	10.7	17.126	150	0	444370	528270	419660	651630	370670	767430	752390
Q803H5;Q5BJ11;Q6PH57;E7F0T7;Q5U3U8;A0A2R8RKX9	2;2;2;1;1;1	Guanine nucleotide-binding protein G(I)/G(S)/G(T) subunit beta-1	gnb1b;gnb2;gnb1;CABZ01087197.1;gnb4b	tr|Q803H5|Q803H5_DANRE Gnb1l protein OS=Danio rerio OX=7955 GN=gnb1b PE=2 SV=1;tr|Q5BJ11|Q5BJ11_DANRE Gnb2 protein OS=Danio rerio OX=7955 GN=gnb2 PE=1 SV=1;sp|Q6PH57|GBB1_DANRE Guanine nucleotide-binding protein G(I)/G(S)/G(T) subunit beta-1 OS=Danio rerio	6.2	37.303	340;340;340;249;279;340	1083200	286920	0	0	0	28664	0	33002
Q5BJA1	11		zgc:114188	tr|Q5BJA1|Q5BJA1_DANRE 40S ribosomal protein S17 OS=Danio rerio OX=7955 GN=zgc:114188 PE=1 SV=1	63.4	15.453	134	40132000	78664000	112230000	102940000	100670000	111150000	254890000	277830000
Q5BJJ2;F1QBR2	29;13		rpl3	tr|Q5BJJ2|Q5BJJ2_DANRE Ribosomal protein L3 OS=Danio rerio OX=7955 GN=rpl3 PE=1 SV=1	53.1	46.255	403;188	1117700000	1024900000	642680000	809530000	1622100000	785960000	1547400000	2084000000
Q5BKV9;Q6DRM3	12;9		rpl9	tr|Q5BKV9|Q5BKV9_DANRE 60S ribosomal protein L9 OS=Danio rerio OX=7955 GN=rpl9 PE=1 SV=1;tr|Q6DRM3|Q6DRM3_DANRE 60S ribosomal protein L9 OS=Danio rerio OX=7955 GN=rpl9 PE=1 SV=1	65.6	21.654	192;193	307820000	745450000	425300000	523660000	403320000	347780000	501160000	525370000
Q6PBH4;Q5BL99	3;3		dynll1;dnl2l	tr|Q6PBH4|Q6PBH4_DANRE Dynein light chain OS=Danio rerio OX=7955 GN=dynll1 PE=1 SV=1;tr|Q5BL99|Q5BL99_DANRE Dynein light chain OS=Danio rerio OX=7955 GN=dynll2b PE=1 SV=1	25.8	10.36	89;89	17873000	4113400	482950	0	873600	455320	1646600	864470
Q5BLF0	13	60S ribosomal export protein NMD3	nmd3	sp|Q5BLF0|NMD3_DANRE 60S ribosomal export protein NMD3 OS=Danio rerio OX=7955 GN=nmd3 PE=2 SV=1	34.9	57.731	505	14460000	16965000	20146000	32187000	47147000	33132000	60337000	66567000
Q5RG12	11		hsp90aa1.2	tr|Q5RG12|Q5RG12_DANRE Heat shock protein 90, alpha (cytosolic), class A member 1, tandem duplicate 2 OS=Danio rerio OX=7955 GN=hsp90aa1.2 PE=1 SV=1	17.7	84.69	734	47447000	14705000	2739500	2075600	5712400	6476300	5422700	7118500
Q5RGK8;Q7ZT42	2;2	Staphylococcal nuclease domain-containing protein 1	snd1	tr|Q5RGK8|Q5RGK8_DANRE Staphylococcal nuclease domain-containing protein OS=Danio rerio OX=7955 GN=snd1 PE=1 SV=2;sp|Q7ZT42|SND1_DANRE Staphylococcal nuclease domain-containing protein 1 OS=Danio rerio OX=7955 GN=snd1 PE=2 SV=1	2.5	102.59	913;897	0	112100	0	93809	166380	58904	194820	683860
Q5RGP9	1	Thyroid transcription factor 1-associated protein 26 homolog	ccdc59	sp|Q5RGP9|TAP26_DANRE Thyroid transcription factor 1-associated protein 26 homolog OS=Danio rerio OX=7955 GN=ccdc59 PE=3 SV=1	4.7	30.428	256	219820	283040	0	430300	1286300	1120600	1238100	2108100
Q5RHQ7	4		hnrnpub	tr|Q5RHQ7|Q5RHQ7_DANRE Heterogeneous nuclear ribonucleoprotein Ub OS=Danio rerio OX=7955 GN=hnrnpub PE=1 SV=1	6.5	88.549	796	0	0	1692400	1419200	2001400	2621600	1084600	1361900
Q5TZ29;A0A286YAF6	52;50		apobb.1	tr|Q5TZ29|Q5TZ29_DANRE Apolipoprotein Bb, tandem duplicate 1 OS=Danio rerio OX=7955 GN=apobb.1 PE=1 SV=1;tr|A0A286YAF6|A0A286YAF6_DANRE Apolipoprotein Bb, tandem duplicate 1 OS=Danio rerio OX=7955 GN=apobb.1 PE=1 SV=2	19.1	412.59	3730;3643	236010	580450	383210	351320	35803000	42028000	96718000	97617000
Q5TZG5	3		ezrb	tr|Q5TZG5|Q5TZG5_DANRE Ezrin OS=Danio rerio OX=7955 GN=ezrb PE=1 SV=1	5.5	68.725	583	5320700	339660	0	0	0	0	0	0
Q5XJ10;E9QIH5;F1R3D3;Q5MJ86	2;1;1;1	Glyceraldehyde-3-phosphate dehydrogenase;Glyceraldehyde-3-phosphate dehydrogenase 2	gapdh;gapdhs;gapdh-2	sp|Q5XJ10|G3P_DANRE Glyceraldehyde-3-phosphate dehydrogenase OS=Danio rerio OX=7955 GN=gapdh PE=2 SV=2;tr|E9QIH5|E9QIH5_DANRE Glyceraldehyde-3-phosphate dehydrogenase (Fragment) OS=Danio rerio OX=7955 GN=gapdh PE=1 SV=6;tr|F1R3D3|F1R3D3_DANRE Glyceraldehyd	6.6	35.784	333;239;335;335	9814500	7115700	622030	745750	222310	531420	483740	518050
Q642H9	23	40S ribosomal protein S4, X isoform	rps4x	sp|Q642H9|RS4X_DANRE 40S ribosomal protein S4, X isoform OS=Danio rerio OX=7955 GN=rps4x PE=2 SV=3	72.6	29.688	263	854990000	1095000000	910360000	1093800000	1173200000	1222000000	1250500000	1617700000
Q68EI0	2	WD repeat-containing protein 18	wdr18	sp|Q68EI0|WDR18_DANRE WD repeat-containing protein 18 OS=Danio rerio OX=7955 GN=wdr18 PE=2 SV=1	6.3	47.155	431	160000	133660	907870	1340000	2013400	1725600	712420	538650
Q6AXJ2;Q5PR67	4;1	Eukaryotic translation initiation factor 3 subunit H-A	eif3ha	sp|Q6AXJ2|EI3HA_DANRE Eukaryotic translation initiation factor 3 subunit H-A OS=Danio rerio OX=7955 GN=eif3ha PE=2 SV=1	15.8	38.596	335;333	3618200	1549500	1288800	1792800	4624100	6041000	2091400	2275000
Q6DGH3;F8W5Y7	3;1		sec61b	tr|Q6DGH3|Q6DGH3_DANRE Protein transport protein Sec61 subunit beta OS=Danio rerio OX=7955 GN=sec61b PE=1 SV=1	38.1	10.018	97;75	903970	107360	1000800	1088000	2713300	595600	6336900	7982800
Q6DGI3	4	Nucleolar protein 16	nop16	sp|Q6DGI3|NOP16_DANRE Nucleolar protein 16 OS=Danio rerio OX=7955 GN=nop16 PE=2 SV=1	31.6	20.228	171	1073700	1866600	141740	964700	1601400	691310	1353000	1770000
Q6DGJ3	1	Mitochondrial import inner membrane translocase subunit Tim13	timm13	sp|Q6DGJ3|TIM13_DANRE Mitochondrial import inner membrane translocase subunit Tim13 OS=Danio rerio OX=7955 GN=timm13 PE=3 SV=1	14.7	10.621	95	469120	1095300	674940	781750	634370	231510	50906	47087
Q6DGL9;A0A2R8Q6W6	2;1		rpl38	tr|Q6DGL9|Q6DGL9_DANRE 60S ribosomal protein L38 OS=Danio rerio OX=7955 GN=rpl38 PE=1 SV=1;tr|A0A2R8Q6W6|A0A2R8Q6W6_DANRE 60S ribosomal protein L38 OS=Danio rerio OX=7955 PE=3 SV=1	28.6	8.2178	70;87	349110000	129990000	165780000	208270000	199810000	273080000	261560000	257570000
Q6DGM0	9		rpl35a	tr|Q6DGM0|Q6DGM0_DANRE 60S ribosomal protein L35a OS=Danio rerio OX=7955 GN=rpl35a PE=1 SV=1	53.6	12.475	110	307740000	198190000	404840000	368890000	441610000	417550000	520800000	627500000
Q6DH29	2		mrps26	tr|Q6DH29|Q6DH29_DANRE Mitochondrial ribosomal protein S26 OS=Danio rerio OX=7955 GN=mrps26 PE=1 SV=1	13.5	24.334	207	263950	0	325820	822340	790310	764610	0	231400
Q6DHL6	11	40S ribosomal protein S6	rps6	tr|Q6DHL6|Q6DHL6_DANRE 40S ribosomal protein S6 OS=Danio rerio OX=7955 GN=rps6 PE=1 SV=1	34.1	28.708	249	46860000	75709000	147820000	111940000	148800000	99312000	142580000	135730000
Q6DHS3	11	Ribosomal protein L15	rpl15	tr|Q6DHS3|Q6DHS3_DANRE Ribosomal protein L15 OS=Danio rerio OX=7955 GN=rpl15 PE=1 SV=1	43.1	24.064	204	124240000	313130000	219110000	284210000	228430000	183920000	311570000	301010000
Q6DHU3	2		krt97	tr|Q6DHU3|Q6DHU3_DANRE Keratin 97 OS=Danio rerio OX=7955 GN=krt97 PE=1 SV=1	8	49.785	438	0	0	72699	79582	676240	162990	249430	197820
Q6DI36	1		rab15	tr|Q6DI36|Q6DI36_DANRE RAB15, member RAS oncogene family OS=Danio rerio OX=7955 GN=rab15 PE=2 SV=1	5.2	24.295	212	2489500	779250	65407	0	132120	113060	71100	107330
Q6DRC4	4	Eukaryotic translation initiation factor 3 subunit G	eif3g	sp|Q6DRC4|EIF3G_DANRE Eukaryotic translation initiation factor 3 subunit G OS=Danio rerio OX=7955 GN=eif3g PE=1 SV=1	15.7	32.843	293	2922500	2682500	4351400	4532400	7116600	4051600	4115500	7301900
Q6DRD2;R4GEZ7	2;1		psmc6	tr|Q6DRD2|Q6DRD2_DANRE 26S protease regulatory subunit S10B OS=Danio rerio OX=7955 GN=psmc6 PE=1 SV=1;tr|R4GEZ7|R4GEZ7_DANRE Proteasome 26S subunit, ATPase 6 OS=Danio rerio OX=7955 GN=psmc6 PE=1 SV=1	6.9	44.224	389;182	771700	460900	17710	20013	36557	0	45407	247620
Q6DRE5;G1K2N3;E7EZW9	5;1;1		nop56	tr|Q6DRE5|Q6DRE5_DANRE NOP56 OS=Danio rerio OX=7955 GN=nop56 PE=1 SV=1	11.1	60.672	548;110;142	114520	194030	304800	288880	1509700	1621200	1354900	3013000
Q6DRE6;A0A2R8RYC9;A0A2R8QFL0;A0A2R8Q7N4	7;6;6;6		rpl12	tr|Q6DRE6|Q6DRE6_DANRE 60S ribosomal protein L12 OS=Danio rerio OX=7955 GN=rpl12 PE=1 SV=1;tr|A0A2R8RYC9|A0A2R8RYC9_DANRE 60S ribosomal protein L12 OS=Danio rerio OX=7955 GN=rpl12 PE=1 SV=1;tr|A0A2R8QFL0|A0A2R8QFL0_DANRE 60S ribosomal protein L12 OS=Danio	59.4	17.685	165;163;166;182	1287800000	1478000000	1281500000	1388300000	1286200000	1344400000	1502300000	1877900000
Q6DRI5	19	Nucleolar GTP-binding protein 1	gtpbp4	tr|Q6DRI5|Q6DRI5_DANRE Nucleolar GTP-binding protein 1 OS=Danio rerio OX=7955 GN=gtpbp4 PE=1 SV=1	31.5	73.465	631	3460300	4164200	2892000	17187000	16028000	18899000	33302000	53307000
Q6DRK9	2		surf6	tr|Q6DRK9|Q6DRK9_DANRE Kynurenine aminotransferase 1 OS=Danio rerio OX=7955 GN=surf6 PE=1 SV=1	6.4	41.588	362	214070	210300	308160	326180	529300	626610	1191500	1796100
Q6GQM9	3		eno2	tr|Q6GQM9|Q6GQM9_DANRE 2-phospho-D-glycerate hydro-lyase OS=Danio rerio OX=7955 GN=eno2 PE=1 SV=1	10.6	46.84	434	8273100	4594600	205460	260290	240600	141400	0	0
Q6IMW6;F8W246	11;8		rps13	tr|Q6IMW6|Q6IMW6_DANRE 40S ribosomal protein S13 OS=Danio rerio OX=7955 GN=rps13 PE=1 SV=1;tr|F8W246|F8W246_DANRE 40S ribosomal protein S13 OS=Danio rerio OX=7955 GN=rps13 PE=1 SV=1	54.3	17.194	151;121	2680100000	676810000	947200000	771150000	905980000	748390000	1724600000	964500000
Q6IQ73;F8W4C9	4;1	Charged multivesicular body protein 4c	chmp4c	sp|Q6IQ73|CHM4C_DANRE Charged multivesicular body protein 4c OS=Danio rerio OX=7955 GN=chmp4c PE=2 SV=1	28.1	25.176	224;63	1324500	3976300	933730	1301800	3042100	1270400	646970	127370
Q6IQB1;A0A286YAR2	15;14		rpl5b	tr|Q6IQB1|Q6IQB1_DANRE Ribosomal protein L5b OS=Danio rerio OX=7955 GN=rpl5b PE=1 SV=1;tr|A0A286YAR2|A0A286YAR2_DANRE Ribosomal protein L5b OS=Danio rerio OX=7955 GN=rpl5b PE=1 SV=2	56.1	34.054	296;290	483700000	487260000	598680000	420520000	548560000	335260000	712880000	540940000
Q6IQI6	13		rpl11	tr|Q6IQI6|Q6IQI6_DANRE 60S ribosomal protein L11 OS=Danio rerio OX=7955 GN=rpl11 PE=1 SV=1	68	20.376	178	589690000	455200000	649250000	417160000	644250000	596050000	787290000	719800000
Q6IQJ7	2	Ribosomal protein L37	rpl37	tr|Q6IQJ7|Q6IQJ7_DANRE Ribosomal protein L37 OS=Danio rerio OX=7955 GN=rpl37 PE=2 SV=1	17.5	11.042	97	4593400	7511300	5174000	6041400	6208800	4983100	2973500	7357200
Q6IQM0	1		sf3b6	tr|Q6IQM0|Q6IQM0_DANRE Splicing factor 3B OS=Danio rerio OX=7955 GN=sf3b6 PE=1 SV=1	11.2	14.585	125	450840	0	428350	352700	910550	645040	1280400	1442800
Q6IQQ0	12		rpl21	tr|Q6IQQ0|Q6IQQ0_DANRE 60S ribosomal protein L21 OS=Danio rerio OX=7955 GN=rpl21 PE=1 SV=1	51.2	18.531	160	541110000	580620000	419300000	622140000	555000000	527580000	820290000	789760000
Q6IQT8;Q8AWW7	2;2	RuvB-like 1	ruvbl1	tr|Q6IQT8|Q6IQT8_DANRE RuvB-like helicase OS=Danio rerio OX=7955 GN=ruvbl1 PE=1 SV=1;sp|Q8AWW7|RUVB1_DANRE RuvB-like 1 OS=Danio rerio OX=7955 GN=ruvbl1 PE=2 SV=1	8.8	50.366	456;456	0	0	161910	1143600	228840	638730	703500	165670
Q6NWB3	1		sf3b4	tr|Q6NWB3|Q6NWB3_DANRE Splicing factor 3b, subunit 4 OS=Danio rerio OX=7955 GN=sf3b4 PE=1 SV=1	3.5	41.957	400	0	0	0	212850	374880	0	484360	692510
Q6NWC3;E9QDR0	14;3		rps2	tr|Q6NWC3|Q6NWC3_DANRE 40S ribosomal protein S2 OS=Danio rerio OX=7955 GN=rps2 PE=1 SV=1	53.6	30.29	280;111	1089700000	986680000	1146600000	1203100000	1492000000	873050000	1828300000	2032300000
Q6NWJ5;A9JST4;Q6TNP9	9;5;5		tuba8l4;tuba8l	tr|Q6NWJ5|Q6NWJ5_DANRE Tubulin alpha chain OS=Danio rerio OX=7955 GN=tuba8l4 PE=1 SV=1;tr|A9JST4|A9JST4_DANRE Tuba8l4 protein OS=Danio rerio OX=7955 GN=tuba8l4 PE=1 SV=1;tr|Q6TNP9|Q6TNP9_DANRE Tubulin alpha chain OS=Danio rerio OX=7955 GN=tuba5 PE=1 SV=1	31.3	50.034	450;297;449	3965500	1682700	91141	121510	209080	108590	0	0
Q6NX08	3	Ribosome biogenesis protein wdr12	wdr12	sp|Q6NX08|WDR12_DANRE Ribosome biogenesis protein wdr12 OS=Danio rerio OX=7955 GN=wdr12 PE=2 SV=1	10.7	47.281	422	524320	890630	305660	507650	1067400	613330	2025100	2164300
Q6NY89;A0A0R4IIR9	3;2	Large subunit GTPase 1 homolog	lsg1	sp|Q6NY89|LSG1_DANRE Large subunit GTPase 1 homolog OS=Danio rerio OX=7955 GN=lsg1 PE=2 SV=1;tr|A0A0R4IIR9|A0A0R4IIR9_DANRE Large subunit GTPase 1 homolog OS=Danio rerio OX=7955 GN=lsg1 PE=1 SV=1	5.6	72.896	640;640	0	0	28612	0	0	378310	273530	1399000
Q6NZS4;A0A0R4II58	3;1	tRNA-splicing ligase RtcB homolog	rtcb	sp|Q6NZS4|RTCB_DANRE RNA-splicing ligase RtcB homolog OS=Danio rerio OX=7955 GN=rtcb PE=2 SV=1	8.1	55.338	505;39	265890	431740	810960	354440	1454100	2161300	1669000	2198900
Q803Q7;Q6P043;F1QC70;A0A2R8QMC2;Q4KMC8	2;2;1;1;1	Fructose-bisphosphate aldolase;Fructose-bisphosphate aldolase C-A	aldoaa;aldoab;aldoca	tr|Q803Q7|Q803Q7_DANRE Fructose-bisphosphate aldolase OS=Danio rerio OX=7955 GN=aldoaa PE=1 SV=1;tr|Q6P043|Q6P043_DANRE Fructose-bisphosphate aldolase OS=Danio rerio OX=7955 GN=aldoab PE=1 SV=1;tr|F1QC70|F1QC70_DANRE Fructose-bisphosphate aldolase OS=Danio	6	39.74	364;364;364;370;364	5019000	2594700	0	183380	154240	277640	168820	563270
Q6P0C5	2		rpf2	tr|Q6P0C5|Q6P0C5_DANRE Ribosome production factor 2 homolog OS=Danio rerio OX=7955 GN=rpf2 PE=1 SV=1	6.8	35.461	308	781080	836610	425180	145570	960000	936630	3884100	2001500
Q6P0V6	19	60S ribosomal protein L8	rpl8	sp|Q6P0V6|RL8_DANRE 60S ribosomal protein L8 OS=Danio rerio OX=7955 GN=rpl8 PE=2 SV=3	50.2	28.066	257	422580000	999630000	514620000	755160000	727420000	1027100000	1013900000	1195900000
Q6P0Z3	1		wbp1	tr|Q6P0Z3|Q6P0Z3_DANRE WW domain-binding protein 1 OS=Danio rerio OX=7955 GN=wbp1 PE=2 SV=1	3.5	25.455	227	0	0	17021	0	0	0	0	9647600
Q6P124	1		g3bp1	tr|Q6P124|Q6P124_DANRE GTPase-activating protein (SH3 domain)-binding protein 1 OS=Danio rerio OX=7955 GN=g3bp1 PE=1 SV=1	1.7	53.169	477	115280	142740	0	462700	584800	729380	506480	712350
Q6P3J5	45		eef2b	tr|Q6P3J5|Q6P3J5_DANRE Eukaryotic translation elongation factor 2 OS=Danio rerio OX=7955 GN=eef2b PE=1 SV=1	56.8	95.497	858	279540000	292170000	199750000	185740000	147170000	124680000	97302000	100720000
Q6P3L3	21		hspa5	tr|Q6P3L3|Q6P3L3_DANRE 78 kDa glucose-regulated protein OS=Danio rerio OX=7955 GN=hspa5 PE=1 SV=1	32.8	71.99	650	17789000	11639000	7239500	7649100	19391000	19606000	49923000	69455000
Q6P5K3;F8W4I2	17;9		rplp0	tr|Q6P5K3|Q6P5K3_DANRE 60S acidic ribosomal protein P0 OS=Danio rerio OX=7955 GN=rplp0 PE=1 SV=1;tr|F8W4I2|F8W4I2_DANRE 60S acidic ribosomal protein P0 (Fragment) OS=Danio rerio OX=7955 GN=rplp0 PE=1 SV=1	57	34.425	316;156	1728200000	1748700000	2349900000	2243400000	1272100000	2359500000	2736700000	3386800000
Q6P5K5;E9QHS9	6;2		rplp1	tr|Q6P5K5|Q6P5K5_DANRE Ribosomal protein, large, P1 OS=Danio rerio OX=7955 GN=rplp1 PE=1 SV=1	91.2	11.469	113;55	187440000	336710000	574080000	624960000	585290000	376620000	2687900000	708360000
Q6P5L3	11	60S ribosomal protein L19	rpl19	sp|Q6P5L3|RL19_DANRE 60S ribosomal protein L19 OS=Danio rerio OX=7955 GN=rpl19 PE=2 SV=1	32.1	23.453	196	181550000	406110000	246720000	418430000	351600000	358380000	477720000	534710000
Q6P5M2;E7F786;X1WFU6	7;5;3	WD repeat-containing protein 61	wdr61	sp|Q6P5M2|WDR61_DANRE WD repeat-containing protein 61 OS=Danio rerio OX=7955 GN=wdr61 PE=2 SV=1;tr|E7F786|E7F786_DANRE WD repeat-containing protein 61 OS=Danio rerio OX=7955 GN=wdr61 PE=1 SV=1	31.1	33.336	305;305;113	4300900	4529600	11655000	11807000	14474000	17321000	15209000	14624000
Q6P5M3;A3KQ06;F6P0J0	18;13;13		rps9	tr|Q6P5M3|Q6P5M3_DANRE 40S ribosomal protein S9 OS=Danio rerio OX=7955 GN=rps9 PE=1 SV=1;tr|A3KQ06|A3KQ06_DANRE 40S ribosomal protein S9 (Fragment) OS=Danio rerio OX=7955 GN=rps9 PE=1 SV=8;tr|F6P0J0|F6P0J0_DANRE 40S ribosomal protein S9 OS=Danio rerio OX=7	59.3	22.466	194;135;136	565850000	821900000	812320000	889200000	948600000	868660000	943810000	1301100000
Q6P5M9;A0A2R8Q8X0;Q6IQJ2	10;9;9		tubb4b	tr|Q6P5M9|Q6P5M9_DANRE Tubulin beta chain OS=Danio rerio OX=7955 GN=tubb4b PE=2 SV=1;tr|A0A2R8Q8X0|A0A2R8Q8X0_DANRE Tubulin beta chain OS=Danio rerio OX=7955 GN=zgc:55461 PE=1 SV=1;tr|Q6IQJ2|Q6IQJ2_DANRE Tubulin beta chain OS=Danio rerio OX=7955 GN=zgc:554	33.9	49.786	445;443;445	1886200	345990	65079	114110	63144	157280	288560	238850
Q6P6F0	12		rps17	tr|Q6P6F0|Q6P6F0_DANRE 40S ribosomal protein S17 OS=Danio rerio OX=7955 GN=rps17 PE=1 SV=1	66.4	15.428	134	415550000	433830000	444150000	492230000	471560000	358250000	425270000	468650000
Q6P977;Q5BJD1;F1RDG8;A9ULS4;A0A0R4IH39;A0A2R8PWM6;Q4V957;E9QE54;A8KBS0;A0A2R8QLH1;A0A0R4IT88	2;1;1;1;1;1;1;1;1;1;1		rab42a;rab6bb;rab6ba;rab6a;rab41	tr|Q6P977|Q6P977_DANRE RAB42, member RAS oncogene family a OS=Danio rerio OX=7955 GN=rab42a PE=2 SV=1;tr|Q5BJD1|Q5BJD1_DANRE RAB6B, member RAS oncogene family b OS=Danio rerio OX=7955 GN=rab6bb PE=2 SV=1;tr|F1RDG8|F1RDG8_DANRE RAB6B, member RAS oncogene fa	9.4	24.473	213;208;208;208;208;209;211;211;211;211;215	0	2483600	0	0	0	0	0	0
Q6PBJ9	11		rplp2	tr|Q6PBJ9|Q6PBJ9_DANRE 60S acidic ribosomal protein P2 OS=Danio rerio OX=7955 GN=rplp2 PE=1 SV=1	97.4	11.712	115	520620000	758170000	743770000	623840000	656220000	582920000	472230000	698200000
Q6PBK3	6	40S ribosomal protein S28	rps28	sp|Q6PBK3|RS28_DANRE 40S ribosomal protein S28 OS=Danio rerio OX=7955 GN=rps28 PE=3 SV=1	56.5	7.8239	69	782160000	729880000	918930000	775730000	814150000	466450000	765310000	1187400000
Q6PBT1;E9QFY8	5;2	40S ribosomal protein S27	rps27.2	tr|Q6PBT1|Q6PBT1_DANRE 40S ribosomal protein S27 OS=Danio rerio OX=7955 GN=rps27.2 PE=1 SV=1	40.5	9.5031	84;52	14396000	0	2781800	0	20490000	24177000	37036000	40900000
Q6PBV6	2	H/ACA ribonucleoprotein complex subunit 2-like protein	nhp2	sp|Q6PBV6|NHP2_DANRE H/ACA ribonucleoprotein complex subunit 2-like protein OS=Danio rerio OX=7955 GN=nhp2 PE=2 SV=1	19.3	16.688	150	270760	130760	240520	777190	1870700	3652500	3536200	4930100
Q6PBW3	13		rps14	tr|Q6PBW3|Q6PBW3_DANRE Ribosomal protein S14 OS=Danio rerio OX=7955 GN=rps14 PE=1 SV=1	77.5	16.245	151	389130000	494930000	459390000	477220000	373500000	472540000	585350000	613870000
Q6PBY1	29	40S ribosomal protein S3a	rps3a	sp|Q6PBY1|RS3A_DANRE 40S ribosomal protein S3a OS=Danio rerio OX=7955 GN=rps3a PE=2 SV=3	72.3	30.199	267	1601100000	1955700000	2459100000	1820300000	2204600000	2369400000	2418600000	2891000000
Q6PBY8	2		skp1	tr|Q6PBY8|Q6PBY8_DANRE S-phase kinase-associated protein 1 OS=Danio rerio OX=7955 GN=skp1 PE=1 SV=1	8.6	18.69	163	1893100	1246400	1481800	1074400	345720	950250	238850	2665500
Q6PC14	9	60S ribosomal protein L23	rpl23	sp|Q6PC14|RL23_DANRE 60S ribosomal protein L23 OS=Danio rerio OX=7955 GN=rpl23 PE=2 SV=1	65.7	14.881	140	570130000	390790000	448150000	379040000	525970000	555850000	734270000	1805200000
Q6PC69;A0A2R8Q8M5;E9QFD9	17;13;4	60S ribosomal protein L10a	rpl10a	sp|Q6PC69|RL10A_DANRE 60S ribosomal protein L10a OS=Danio rerio OX=7955 GN=rpl10a PE=2 SV=1;tr|A0A2R8Q8M5|A0A2R8Q8M5_DANRE Ribosomal protein OS=Danio rerio OX=7955 GN=rpl10a PE=1 SV=1	58.8	24.622	216;164;67	1256500000	1768800000	1353200000	1247800000	1748400000	996980000	1724800000	912390000
Q6PC80	14		rps5	tr|Q6PC80|Q6PC80_DANRE Ribosomal protein S5 OS=Danio rerio OX=7955 GN=rps5 PE=1 SV=1	54.9	22.872	204	966240000	1310900000	899500000	808620000	1080800000	784740000	1109800000	1221700000
Q6PC90	11	40S ribosomal protein S12	rps12	tr|Q6PC90|Q6PC90_DANRE 40S ribosomal protein S12 OS=Danio rerio OX=7955 GN=rps12 PE=1 SV=1	78	14.466	132	1005300000	1189000000	1290500000	1355300000	1292900000	982060000	1492700000	1495400000
Q6PCR7	16	Eukaryotic translation initiation factor 3 subunit A	eif3a	sp|Q6PCR7|EIF3A_DANRE Eukaryotic translation initiation factor 3 subunit A OS=Danio rerio OX=7955 GN=eif3a PE=2 SV=1	16	151.29	1267	3198200	3009900	4765800	5844400	12645000	8674600	5140800	4265400
Q6PFJ0	4		rpl7l1	tr|Q6PFJ0|Q6PFJ0_DANRE Ribosomal protein L7-like 1 OS=Danio rerio OX=7955 GN=rpl7l1 PE=1 SV=1	17.4	28.466	247	1052800	998720	761350	644600	1875600	1648100	5705900	6417900
Q6PFU4;Q7ZUQ1;Q52WY2;E9QFR9;Q803L7;Q803F2;Q6PE28;Q1LY89;F6PAA2;Q7ZVI3;Q5TZD5	3;2;2;1;1;1;1;1;1;1;1		cdc42;cdc42l	tr|Q6PFU4|Q6PFU4_DANRE Cell division control protein 42 homolog OS=Danio rerio OX=7955 GN=cdc42 PE=1 SV=1;tr|Q7ZUQ1|Q7ZUQ1_DANRE Cell division control protein 42 homolog OS=Danio rerio OX=7955 GN=cdc42l PE=1 SV=1;tr|Q52WY2|Q52WY2_DANRE Cell division contro	16.8	21.271	191;191;191;67;191;191;191;191;191;205;226	1711500	175150	0	0	0	0	0	0
Q6PGX4	16		hsc70	tr|Q6PGX4|Q6PGX4_DANRE Heat shock cognate 70 OS=Danio rerio OX=7955 GN=hsc70 PE=1 SV=1	27.8	70.945	647	15301000	2935800	58459	22441	86848	80972	108660	146260
Q6PH46	2	T-complex protein 1 subunit delta	cct4	tr|Q6PH46|Q6PH46_DANRE T-complex protein 1 subunit delta OS=Danio rerio OX=7955 GN=cct4 PE=1 SV=1	3.9	56.973	533	433390	0	70549	75752	868530	652540	181130	892340
Q6PHD8;A0A0R4IQ97;E9QCR3	12;10;4		pa2g4b	tr|Q6PHD8|Q6PHD8_DANRE Proliferation-associated 2G4, b OS=Danio rerio OX=7955 GN=pa2g4b PE=1 SV=1;tr|A0A0R4IQ97|A0A0R4IQ97_DANRE Proliferation-associated 2G4, b OS=Danio rerio OX=7955 GN=pa2g4b PE=1 SV=2	32.5	43.475	394;363;207	7694100	7946800	7969700	8801800	6219100	6787400	5200900	10134000
Q6Q415	6	60S ribosomal protein L36	rpl36	sp|Q6Q415|RL36_DANRE 60S ribosomal protein L36 OS=Danio rerio OX=7955 GN=rpl36 PE=3 SV=1	33.3	12.179	105	51405000	77574000	131060000	161850000	159690000	148640000	198540000	241270000
Q6Q417	9		rpl7	tr|Q6Q417|Q6Q417_DANRE Ribosomal protein L7 OS=Danio rerio OX=7955 GN=rpl7 PE=1 SV=1	34.1	28.445	246	49463000	85545000	103860000	37256000	159010000	84082000	61744000	66486000
Q6Q419	2		rps29	tr|Q6Q419|Q6Q419_DANRE 40S ribosomal protein S29 OS=Danio rerio OX=7955 GN=rps29 PE=1 SV=1	32.1	6.6787	56	132700000	176430000	145050000	131810000	154240000	150570000	140160000	202890000
Q6Q420	9		rps15a	sp|Q6Q420|RS15A_DANRE 40S ribosomal protein S15a OS=Danio rerio OX=7955 GN=rps15a PE=2 SV=1	70	14.839	130	578090000	618510000	758490000	695860000	789840000	691490000	954060000	824230000
Q6TEL1	2		rad21a	sp|Q6TEL1|RA21A_DANRE Double-strand-break repair protein rad21 homolog A OS=Danio rerio OX=7955 GN=rad21a PE=1 SV=1	4.4	72.271	643	4731500	2079300	26262	0	0	0	134630	156020
Q6TGT9;A0A2R8Q2Y4;F8W2Y8;A0A0R4ISU1	4;3;2;1		srsf5a	tr|Q6TGT9|Q6TGT9_DANRE Serine and arginine-rich-splicing factor 5a OS=Danio rerio OX=7955 GN=srsf5a PE=1 SV=1;tr|A0A2R8Q2Y4|A0A2R8Q2Y4_DANRE Serine and arginine-rich-splicing factor 5a OS=Danio rerio OX=7955 GN=srsf5a PE=1 SV=1;tr|F8W2Y8|F8W2Y8_DANRE Serin	17	29.57	259;290;133;95	777430	854550	1557500	1347300	2909200	1681600	3506900	4004200
Q6TGY6;B8K0D5	16;15	Polyadenylate-binding protein	pabpc1l	tr|Q6TGY6|Q6TGY6_DANRE Polyadenylate-binding protein OS=Danio rerio OX=7955 GN=pabpc1l PE=1 SV=1;tr|B8K0D5|B8K0D5_DANRE Poly(A)-binding protein, cytoplasmic 1-like (Fragment) OS=Danio rerio OX=7955 GN=pabpc1l PE=1 SV=1	27.6	68.968	620;557	4785300	7889300	12258000	9230700	12370000	6602900	1774800	2441200
Q6TH15;Z4YIM6;I3ITC9	9;9;2	Eukaryotic translation initiation factor 3 subunit D	eif3d	sp|Q6TH15|EIF3D_DANRE Eukaryotic translation initiation factor 3 subunit D OS=Danio rerio OX=7955 GN=eif3d PE=2 SV=1;tr|Z4YIM6|Z4YIM6_DANRE Eukaryotic translation initiation factor 3 subunit D OS=Danio rerio OX=7955 GN=eif3d PE=1 SV=1	21.9	64.089	552;550;60	1139100	1171800	2973500	3944200	5148600	4270200	3205400	3632200
Q6TH32	3		cfl1	tr|Q6TH32|Q6TH32_DANRE Cofilin 1 OS=Danio rerio OX=7955 GN=cfl1 PE=1 SV=1	17	18.77	165	9425900	1786600	168150	141930	184360	145710	180630	0
Q6TLG8	27		rps3	tr|Q6TLG8|Q6TLG8_DANRE DNA-(apurinic or apyrimidinic site) lyase OS=Danio rerio OX=7955 GN=rps3 PE=1 SV=1	86.5	26.878	245	2682600000	3388200000	3293000000	2467200000	2835600000	3740400000	4185900000	5204800000
Q6ZM19;B0R0S5;B0R0S6	7;4;3	Eukaryotic translation initiation factor 6	eif6	sp|Q6ZM19|IF6_DANRE Eukaryotic translation initiation factor 6 OS=Danio rerio OX=7955 GN=eif6 PE=2 SV=1;tr|B0R0S5|B0R0S5_DANRE Eukaryotic translation initiation factor 6 (Fragment) OS=Danio rerio OX=7955 GN=eif6 PE=1 SV=1	53.9	26.645	245;149;129	21185000	35445000	42407000	36597000	37045000	28725000	41959000	46756000
Q7SX91	7		rrs1	tr|Q7SX91|Q7SX91_DANRE Ribosome biogenesis regulatory protein OS=Danio rerio OX=7955 GN=rrs1 PE=1 SV=1	24.6	39.274	346	2977300	3370700	3689100	4400200	9472400	6882300	10983000	17804000
Q7SXA1	13		rpl26	tr|Q7SXA1|Q7SXA1_DANRE ATPase H+ transporting V0 subunit e1 OS=Danio rerio OX=7955 GN=atp6v0e1 PE=1 SV=1	52.4	17.341	145	242300000	335220000	269550000	251020000	337140000	73548000	348940000	432170000
Q7SXA3;B0R193;A0A0N4STS4;A0A2R8RR55;B0R189;F1QHN6;A0A0N4SUD2	5;2;2;2;2;2;2		rps27a	tr|Q7SXA3|Q7SXA3_DANRE 40S ribosomal protein S27a OS=Danio rerio OX=7955 GN=rps27a PE=1 SV=1	37.2	17.999	156;88;232;307;459;533;610	51521000	85981000	52697000	51995000	66632000	41145000	59728000	66551000
Q7SXP1	3		capzb	tr|Q7SXP1|Q7SXP1_DANRE F-actin-capping protein subunit beta OS=Danio rerio OX=7955 GN=capzb PE=1 SV=1	13.6	30.742	273	3367100	1863600	61158	94512	0	0	0	213900
Q7SXV2	1	Zinc finger protein AEBP2	aebp2	sp|Q7SXV2|AEBP2_DANRE Zinc finger protein AEBP2 OS=Danio rerio OX=7955 GN=aebp2 PE=2 SV=2	5.1	45.388	415	0	0	0	0	33229	0	36389	0
Q7T1J9;F8W2R0	13;4		rps10	tr|Q7T1J9|Q7T1J9_DANRE Ribosomal protein S10 OS=Danio rerio OX=7955 GN=rps10 PE=1 SV=1	60.2	18.885	166;68	1304700000	339140000	471860000	409380000	464060000	490980000	427210000	456970000
Q7T1K0;E9QHB7	14;9		rpl17	tr|Q7T1K0|Q7T1K0_DANRE 60S ribosomal protein L17 OS=Danio rerio OX=7955 GN=rpl17 PE=1 SV=1;tr|E9QHB7|E9QHB7_DANRE 60S ribosomal protein L17 (Fragment) OS=Danio rerio OX=7955 GN=rpl17 PE=1 SV=1	57.6	21.428	184;155	580060000	813780000	636670000	847050000	826620000	548780000	732930000	981260000
Q7T2A5	6	Eukaryotic translation initiation factor 3 subunit L	eif3l	sp|Q7T2A5|EIF3L_DANRE Eukaryotic translation initiation factor 3 subunit L OS=Danio rerio OX=7955 GN=eif3l PE=2 SV=1	12.5	67.992	576	2106800	2735300	4429100	5334500	7154900	7560400	4044200	5225900
Q7T320	1	RAB6-interacting golgin	gorab	sp|Q7T320|GORAB_DANRE RAB6-interacting golgin OS=Danio rerio OX=7955 GN=gorab PE=2 SV=1	4.2	37.953	336	2559900	260150	130680	0	0	260330	219010	2032300
Q7T334	2	Malate dehydrogenase	mdh2	tr|Q7T334|Q7T334_DANRE Malate dehydrogenase OS=Danio rerio OX=7955 GN=mdh2 PE=1 SV=1	6.2	35.42	337	1650900	1137100	63545	129130	73745	107020	107210	0
Q7T3B0	3	Eukaryotic translation initiation factor 3 subunit M	eif3m	sp|Q7T3B0|EIF3M_DANRE Eukaryotic translation initiation factor 3 subunit M OS=Danio rerio OX=7955 GN=eif3m PE=2 SV=2	10.1	42.699	375	1309700	2009400	995370	4208800	4657100	4145600	2504600	926620
Q7T3G5;F1QUU2	12;11	Polyadenylate-binding protein	pabpc4	tr|Q7T3G5|Q7T3G5_DANRE Polyadenylate-binding protein OS=Danio rerio OX=7955 GN=pabpc4 PE=1 SV=1;tr|F1QUU2|F1QUU2_DANRE Polyadenylate-binding protein (Fragment) OS=Danio rerio OX=7955 GN=pabpc4 PE=1 SV=2	18.5	70.669	637;605	0	0	0	0	0	0	550150	720060
Q7T3G8	1		six6a	tr|Q7T3G8|Q7T3G8_DANRE SIX homeobox 6a OS=Danio rerio OX=7955 GN=six6a PE=2 SV=1	4.9	27.65	245	12071000	5750800	170890	0	0	0	0	0
Q7ZTS4	9	Keratin, type I cytoskeletal 18	krt18	sp|Q7ZTS4|K1C18_DANRE Keratin, type I cytoskeletal 18 OS=Danio rerio OX=7955 GN=krt18 PE=1 SV=2	22.5	48.63	431	0	0	510710	648380	8565600	2214600	3037500	3802400
Q7ZTZ2	1	Probable ribosome biogenesis protein RLP24	rsl24d1	sp|Q7ZTZ2|RLP24_DANRE Probable ribosome biogenesis protein RLP24 OS=Danio rerio OX=7955 GN=rsl24d1 PE=2 SV=1	7.5	19.147	161	557190	0	0	0	0	1059600	1546800	0
Q7ZU48	1		hnrnpa0l	tr|Q7ZU48|Q7ZU48_DANRE Heterogeneous nuclear ribonucleoprotein A0,-like OS=Danio rerio OX=7955 GN=hnrnpa0l PE=1 SV=2	5.3	32.022	302	0	104060	269970	0	205010	536490	432560	969640
Q7ZUB0	4		myl13	tr|Q7ZUB0|Q7ZUB0_DANRE Atrial myosin light chain OS=Danio rerio OX=7955 GN=myl13 PE=1 SV=1	28.5	20.885	186	811780	62905	0	114980	16209	259080	2080000	3494200
Q7ZUW5;Q7ZUG4;Q7ZVP2;X1WEM1;E9QBQ1;A8WHY1;Q6NYD6;F1QW59;A0A2R8QM39	3;3;2;1;1;1;1;1;1		rab5aa;rab5ab;rab5c	tr|Q7ZUW5|Q7ZUW5_DANRE RAB5A, member RAS oncogene family OS=Danio rerio OX=7955 GN=rab5aa PE=1 SV=1;tr|Q7ZUG4|Q7ZUG4_DANRE RAB5A, member RAS oncogene family like OS=Danio rerio OX=7955 GN=rab5ab PE=1 SV=1;tr|Q7ZVP2|Q7ZVP2_DANRE RAB5C, member RAS oncogene f	19	23.494	216;216;221;80;128;163;214;214;214	3533300	1092700	0	0	0	0	0	0
Q7ZUG5	9	40S ribosomal protein S21	rps21	sp|Q7ZUG5|RS21_DANRE 40S ribosomal protein S21 OS=Danio rerio OX=7955 GN=rps21 PE=3 SV=1	79	8.9021	81	464540000	637230000	549550000	554840000	626820000	563450000	730690000	756590000
Q7ZUG6;Q1L8Q7	8;7		rpl30	tr|Q7ZUG6|Q7ZUG6_DANRE 60S ribosomal protein L30 OS=Danio rerio OX=7955 GN=rpl30 PE=1 SV=1;tr|Q1L8Q7|Q1L8Q7_DANRE 60S ribosomal protein L30 OS=Danio rerio OX=7955 GN=rpl30 PE=1 SV=1	66.7	12.983	117;96	980230000	1202100000	1078600000	1043700000	1351100000	1148000000	1199200000	2838200000
Q7ZUI0	12		rpl5a	tr|Q7ZUI0|Q7ZUI0_DANRE Ribosomal protein L5a OS=Danio rerio OX=7955 GN=rpl5a PE=1 SV=1	55.9	34.084	297	1743300	2258800	2118800	2373800	8068400	6033300	53294000	59022000
Q7ZUY3	5	Histone H2AX	h2afx	sp|Q7ZUY3|H2AX_DANRE Histone H2AX OS=Danio rerio OX=7955 GN=h2ax PE=2 SV=3	38.7	15.001	142	0	0	170980	0	0	76551	463730	552680
Q7ZV05	16		rps11	tr|Q7ZV05|Q7ZV05_DANRE 40S ribosomal protein S11 OS=Danio rerio OX=7955 GN=rps11 PE=1 SV=1	61	18.405	159	1099400000	844590000	1237900000	1520500000	1415100000	1157300000	1558600000	1914800000
Q7ZV23	1		nhp2l1b	tr|Q7ZV23|Q7ZV23_DANRE Ribonucloprotein OS=Danio rerio OX=7955 GN=snu13b PE=1 SV=1	10.2	14.018	128	765630	526770	1085700	0	1909400	2197300	3463600	4588600
Q7ZV55	5	Eukaryotic translation initiation factor 3 subunit I	eif3i	sp|Q7ZV55|EIF3I_DANRE Eukaryotic translation initiation factor 3 subunit I OS=Danio rerio OX=7955 GN=eif3i PE=2 SV=1	21.8	36.286	325	1246400	2078500	2513700	3082900	3822500	4297200	2815200	1894100
Q7ZV82	8	60S ribosomal protein L27	rpl27	sp|Q7ZV82|RL27_DANRE 60S ribosomal protein L27 OS=Danio rerio OX=7955 GN=rpl27 PE=2 SV=3	51.5	15.782	136	682530000	783410000	695870000	902370000	899200000	827030000	1132100000	1200800000
Q7ZV96	12		rpl10	sp|Q7ZV96|RL10_DANRE 60S ribosomal protein L10 OS=Danio rerio OX=7955 GN=rpl10 PE=2 SV=1	47	24.611	215	693140000	1056500000	863920000	894160000	1029000000	850890000	1175900000	1052600000
Q7ZVI7;Q7ZVF9;E9QD59;E9QH14	12;12;11;10	Actin, cytoplasmic 1;Actin, cytoplasmic 1, N-terminally processed;Actin, cytoplasmic 2;Actin, cytoplasmic 2, N-terminally processed	actba;actbb;actb1	sp|Q7ZVI7|ACTB1_DANRE Actin, cytoplasmic 1 OS=Danio rerio OX=7955 GN=actba PE=1 SV=2;sp|Q7ZVF9|ACTB2_DANRE Actin, cytoplasmic 2 OS=Danio rerio OX=7955 GN=actbb PE=1 SV=2;tr|E9QD59|E9QD59_DANRE Actin, beta 1 (Fragment) OS=Danio rerio OX=7955 GN=actb1 PE=1 S	40.8	41.766	375;375;303;234	170470000	72481000	2147200	6974200	4060800	3628000	12083000	17565000
Q7ZVN5	2		srp54	sp|Q7ZVN5|SRP54_DANRE Signal recognition particle 54 kDa protein OS=Danio rerio OX=7955 GN=srp54 PE=2 SV=1	4.6	55.752	504	133130	41772	165800	156490	251030	643550	1373300	1631200
Q7ZW20;F1QFK2;Q5CZQ1	7;5;5		ywhae1;ywhae2	tr|Q7ZW20|Q7ZW20_DANRE Tyrosine 3-monooxygenase/tryptophan 5-monooxygenase activation protein, epsilon polypeptide 1 OS=Danio rerio OX=7955 GN=ywhae1 PE=1 SV=1;tr|F1QFK2|F1QFK2_DANRE Tyrosine 3-monooxygenase/tryptophan 5-monooxygenase activation protein, e	28.6	29.072	255;173;255	73447000	5200900	464490	600290	711830	475320	210740	575980
Q7ZW95	30		rpl4	tr|Q7ZW95|Q7ZW95_DANRE Ribosomal protein L4 OS=Danio rerio OX=7955 GN=rpl4 PE=1 SV=1	61.3	42.552	375	776060000	1243200000	1009500000	1394500000	1286600000	1297900000	1379700000	1806200000
Q7ZWE7	1	Nucleolar protein 12	nol12	sp|Q7ZWE7|NOL12_DANRE Nucleolar protein 12 OS=Danio rerio OX=7955 GN=nol12 PE=2 SV=1	4.8	26.515	228	0	91022	108460	114880	280960	270200	0	586800
Q7ZWJ4;F8W484	8;1	60S ribosomal protein L18a	rpl18a	sp|Q7ZWJ4|RL18A_DANRE 60S ribosomal protein L18a OS=Danio rerio OX=7955 GN=rpl18a PE=2 SV=1	39.2	20.68	176;76	78635000	155110000	121190000	117500000	127320000	118950000	167940000	162680000
Q7ZWJ7	8	60S ribosomal protein L34	rpl34	sp|Q7ZWJ7|RL34_DANRE 60S ribosomal protein L34 OS=Danio rerio OX=7955 GN=rpl34 PE=3 SV=3	35	13.369	117	154240000	263840000	225620000	243580000	260100000	306670000	221470000	340020000
Q803B0	1		hspd1	tr|Q803B0|Q803B0_DANRE 60 kDa chaperonin OS=Danio rerio OX=7955 GN=hspd1 PE=1 SV=1	1.6	61.196	575	1279000	0	440510	0	714710	814490	917170	901750
Q803F6;J9JI05	19;9	40S ribosomal protein SA	rpsa	sp|Q803F6|RSSA_DANRE 40S ribosomal protein SA OS=Danio rerio OX=7955 GN=rpsa PE=2 SV=1	61.4	34.012	308;90	1538700000	1967500000	1642100000	1465100000	1703000000	1787500000	2712600000	2210900000
Q803J3	2		rab2a	tr|Q803J3|Q803J3_DANRE RAB2A, member RAS oncogene family OS=Danio rerio OX=7955 GN=rab2a PE=1 SV=1	12.7	23.514	212	1021800	168560	16622	0	15254	0	0	9458.5
Q803J4;F1QRS6	5;4		hnrnpc	tr|Q803J4|Q803J4_DANRE Heterogeneous nuclear ribonucleoprotein C OS=Danio rerio OX=7955 GN=hnrnpc PE=1 SV=1;tr|F1QRS6|F1QRS6_DANRE Heterogeneous nuclear ribonucleoprotein C OS=Danio rerio OX=7955 GN=hnrnpc PE=1 SV=2	19.5	35.016	313;297	1978700	1734300	5154600	5256000	4433100	4253600	3295300	4449700
Q803M8	4		ywhaqb	tr|Q803M8|Q803M8_DANRE 14-3-3 protein theta OS=Danio rerio OX=7955 GN=ywhaqb PE=1 SV=1	12.2	27.803	245	13667000	2605800	53350	297090	316190	350490	276530	406680
Q8AW82	17		pa2g4a	tr|Q8AW82|Q8AW82_DANRE Novel protein similar to human proliferation-associated 2G4 protein (PA2G4) OS=Danio rerio OX=7955 GN=pa2g4a PE=1 SV=1	53.1	43.323	392	26327000	27980000	27244000	27257000	20328000	25826000	18473000	29050000
Q8AX99;A0A2R8Q5Z6;D1GJ56;E9QFR8;A0A2R8QBL5;E9QCQ2;A5PLJ3	9;7;7;2;2;1;1		actn3b;actn3a	tr|Q8AX99|Q8AX99_DANRE Actinin alpha 3b OS=Danio rerio OX=7955 GN=actn3b PE=1 SV=1;tr|A0A2R8Q5Z6|A0A2R8Q5Z6_DANRE Actinin alpha 3a OS=Danio rerio OX=7955 GN=actn3a PE=1 SV=1;tr|D1GJ56|D1GJ56_DANRE Actinin alpha 3a OS=Danio rerio OX=7955 GN=actn3a PE=1 SV=1	13.8	103.86	898;885;896;894;895;126;151	2633000	1096800	0	0	0	0	0	0
Q8JGR2	3		ddx54	tr|Q8JGR2|Q8JGR2_DANRE RNA helicase OS=Danio rerio OX=7955 GN=ddx54 PE=1 SV=1	4.8	97.054	862	271820	403770	86066	235380	756580	1095900	2871500	1298800
Q8JGS9;A0A0R4IIP6;A0A0R4IP85;E9QHH6	15;14;4;2	40S ribosomal protein S18	rps18	sp|Q8JGS9|RS18_DANRE 40S ribosomal protein S18 OS=Danio rerio OX=7955 GN=rps18 PE=2 SV=1;tr|A0A0R4IIP6|A0A0R4IIP6_DANRE 40S ribosomal protein S18 OS=Danio rerio OX=7955 GN=rps18 PE=1 SV=1	54.6	17.731	152;101;89;82	1398200000	1873700000	1231100000	602350000	1700800000	1150600000	1761300000	1413600000
Q8JH70	1	Fructose-bisphosphate aldolase C-B	aldocb	sp|Q8JH70|ALDCB_DANRE Fructose-bisphosphate aldolase C-B OS=Danio rerio OX=7955 GN=aldocb PE=2 SV=1	6.3	39.259	363	4626900	2974500	0	0	0	0	0	0
Q8JHI0;Q6NX10;A2CEZ0	3;1;1		slc25a5	tr|Q8JHI0|Q8JHI0_DANRE Solute carrier family 25 alpha, member 5 OS=Danio rerio OX=7955 GN=slc25a5 PE=1 SV=1	11.7	32.763	298;298;299	1451700	1258000	972350	1027200	2156000	3016700	3203800	4942900
Q8JIY8;F6NUT2	3;2	MKI67 FHA domain-interacting nucleolar phosphoprotein	nifk	sp|Q8JIY8|MK67I_DANRE MKI67 FHA domain-interacting nucleolar phosphoprotein OS=Danio rerio OX=7955 GN=nifk PE=2 SV=2;tr|F6NUT2|F6NUT2_DANRE MKI67 FHA domain-interacting nucleolar phosphoprotein (Fragment) OS=Danio rerio OX=7955 GN=nifk PE=1 SV=1	14.9	30.099	269;145	1291400	408510	236110	537670	2754900	2822700	2502200	3480100
Q8UVX0;A0A0R4IWH9;A0A0J9YJF9;E9QHH1	6;3;2;2	Piwi-like protein 1	piwil1	sp|Q8UVX0|PIWL1_DANRE Piwi-like protein 1 OS=Danio rerio OX=7955 GN=piwil1 PE=1 SV=1;tr|A0A0R4IWH9|A0A0R4IWH9_DANRE Piwi-like protein 1 (Fragment) OS=Danio rerio OX=7955 GN=piwil1 PE=1 SV=1	8.3	97.45	858;143;171;230	214710	351580	2422300	2226800	5681700	5987300	5439900	5209900
Q90Z10;A0A0R4IUM6	16;12	60S ribosomal protein L13	rpl13	sp|Q90Z10|RL13_DANRE 60S ribosomal protein L13 OS=Danio rerio OX=7955 GN=rpl13 PE=2 SV=3;tr|A0A0R4IUM6|A0A0R4IUM6_DANRE 60S ribosomal protein L13 (Fragment) OS=Danio rerio OX=7955 GN=rpl13 PE=1 SV=1	49.3	24.364	211;158	567670000	1004500000	893260000	867870000	982240000	838500000	1120100000	1022900000
Q9PV90	16	60S acidic ribosomal protein P0	rplp0	sp|Q9PV90|RLA0_DANRE 60S acidic ribosomal protein P0 OS=Danio rerio OX=7955 GN=rplp0 PE=2 SV=1	54.2	34.753	319	35214000	173000000	45441000	263440000	50333000	170990000	170700000	262570000
Q9PVF8	2		ctnna1	tr|Q9PVF8|Q9PVF8_DANRE Catenin (Cadherin-associated protein), alpha OS=Danio rerio OX=7955 GN=ctnna1 PE=1 SV=1	2.3	100.52	907	1859700	2208000	2146000	2542000	2161800	2432100	2848000	3047500
Q9PWD8;I3IT59;I3ISA0	17;3;2		cyt1	tr|Q9PWD8|Q9PWD8_DANRE Type I cytokeratin OS=Danio rerio OX=7955 GN=cyt1 PE=1 SV=1	40.3	46.684	429;77;77	5408100	1423600	1958000	2101700	17086000	6808700	32841000	33925000
R4GDY2	1		etaa1	tr|R4GDY2|R4GDY2_DANRE ETAA1 activator of ATR kinase OS=Danio rerio OX=7955 GN=etaa1 PE=4 SV=1	2.1	74.245	667	0	1365000	0	0	0	0	0	0
R4GE02;Q6PC60;F1R4A4;X1WC20;X1WG17;X1WDH8;Q05AK8;R4GE15;F1QAU0;B3DJF8;A0A140LG54;Q5BJA5;G1K2V1;X1WHF1;X1WH60;A7MBY4;F1QMJ9	12;8;8;8;8;8;8;8;8;8;8;8;7;7;7;4;3	Histone H2B 3;Histone H2B;Histone H2B 1/2	si:ch211-113a14.11;hist2h2l;zgc:171759;si:dkey-108k21.20;si:dkey-108k21.9;si:dkey-261m9.19;si:dkey-108k21.13;LOC570661;zgc:173585;si:dkey-261m9.6;si:dkey-108k21.11	tr|R4GE02|R4GE02_DANRE Si:ch211-113a14.11 OS=Danio rerio OX=7955 GN=si:ch211-113a14.11 PE=1 SV=1;sp|Q6PC60|H2B3_DANRE Histone H2B 3 OS=Danio rerio OX=7955 GN=hist2h2l PE=2 SV=3;tr|F1R4A4|F1R4A4_DANRE Histone H2B OS=Danio rerio OX=7955 GN=zgc:171759 PE=1 SV	44.8	27.149	248;126;124;127;125;124;124;124;124;124;124;124;124;124;125;67;118	64513000	20220000	112710000	118010000	478780000	98095000	639750000	729530000
R4GEX4	4		eif3f	tr|R4GEX4|R4GEX4_DANRE Eukaryotic translation initiation factor 3, subunit F (Fragment) OS=Danio rerio OX=7955 GN=eif3f PE=1 SV=1	15.2	31.242	282	1621800	1714900	2704700	3343000	4094800	3296900	2822600	2763500
X1WEJ1	2	Structural maintenance of chromosomes protein	smc1b	tr|X1WEJ1|X1WEJ1_DANRE Structural maintenance of chromosomes protein OS=Danio rerio OX=7955 GN=smc1b PE=1 SV=1	1.7	141.63	1234	10005000	7895400	0	6048800	0	0	74811	0
X1WET9;F1RA36;F1QX66	6;2;2	Eukaryotic translation initiation factor 3 subunit B	eif3ba	tr|X1WET9|X1WET9_DANRE Eukaryotic translation initiation factor 3 subunit B OS=Danio rerio OX=7955 GN=eif3ba PE=1 SV=1	10.7	79.647	681;648;667	1753200	1755500	2749900	4291500	3822500	4369600	3113500	2818200
X1WGX5;E9QJ83;E9QFL4	4;3;1		im:7148292	sp|X1WGX5|PUM3_DANRE Pumilio homolog 3 OS=Danio rerio OX=7955 GN=pum3 PE=2 SV=2;tr|E9QJ83|E9QJ83_DANRE Pumilio homolog 3 OS=Danio rerio OX=7955 GN=pum3 PE=1 SV=1	9.5	71.358	629;601;186	2000900	2055200	2679800	1646300	2572200	2419200	6831800	7307200
