# Supplementary material
Source: HighWire-hosted journal article supplement (doi:10.1101/rna.079633.123)
Supplement: Supplemental_Table_S2.xlsx [file Supplemental_Table_S2.xlsx]

## Sheet: Sheet1
Supplemental Table S2. List of oligonucleotides and primers
Single-strand DNA oligonucleotide for generation of the rpl36-FLAG strain via CRISPR/Cas9	CACAAGAGTCAAAAATACTCGTTTTTACACAAACAATTTTATTTTTGATGATTACACAGGCTATCACTTATCGTCGTCATCCTTGTAATCGCTGCCCTCTTTCTTGGCAGCAGCTTTCCTCATGGCGGCCAGTGTGTTGCTGAGCTCTTCCCTCTTTCTC
Single-strand DNA oligonucleotide for generation of the rps10 K139/140R strain via CRISPR/Cas9	CAGCATGTTTACCTTTTGCCTTTCTCATGCAGCATTATGTTAAACACAACCCTTTATTCAACAGCCGGTGCAGACCGCCGCGCTGAGGCTGGTGCAGGTGCAGCCACAGAGTTCCAGTTTg
Forward primer for rpl36-FLAG sgRNA	TAATACGACTCACTATAGGACACAGGCTACTCTTTCTGTTTTAGAGCTAGAA
Forward primer for rps10 K139/140R sgRNA	TAATACGACTCACTATAGGGTGCAGACAAGAAGGCTGGTTTTAGAGCTAGAA
Reverse primer for rpl36-FLAG and rps10K139/140R sgRNA	AAAAGCACCGACTCGGTGCCACTTTTTCAAGTTGATAACGGACTAGCCTTATTTTAACTTGCTATTTCTAGCTCTAAAAC
Forward primer for genotyping of the rpl36-FLAG strain	ACATCCGCGCTAAGAGAAAG
Reverse primer for genotyping of the rpl36-FLAG strain	TCAAGCACAAGAGTCAAAAATACTC
Forward primer for genotyping of the rps10 K139/140R strain	TGGCGAGGGAGACAGAGATGCT
Reverse primer for genotyping of the rps10 K139/140R strain	CCAGCCTCAGCGCGGCG
Forward primer for rpl36	CCGGAATTCAGAGCAGAGATGGTTGTCAGAT
Reverse primer for rpl36	CCGCTCGAGCTATCACTTATCGTCGTCATCCTTGTAATCGCTGCCCTCTTTCTTGGCAGCAGCTT
Forward primer for eTF1b-WT	GGATCCCATCGATTCGAATTCATGGCGGACGACCCCAGC
Reverse primer for eTF1b-WT	ACGACTCACTATAGTTCTAGACTAGGCGTAGTCTGGGACGTC
Forward primer for eTF1b-AAQ mutation	GCACGGTAGAGCAGCACAGTCCGCTCTTCGTTTTGCTCG
Reverse primer for eTF1b-AAQ mutation	GAAGAGCGGACTGTGCTGCTCTACCGTGCTTTTTGGGCAG
Forward primer for znf598-WT	GCCTCTCGAGATGGAGTCTG
Reverse primer for znf598-WT	TGCTCTAGACTACAAGTCCTCTTCAGAAATGAGCTTTTGCTCGCTTCCGCCGCTGATAATCTTGCTTATGG
Forward primer for znf598-C13/16A mutation	CCGCTCGAGATGGAGTCTGCCCTGAAGAAAGACACGGAGAGCACCGCTGTGCTGGCCTGCCAGGACATCGAC
Reverse primer for znf598-C13/16A mutation	TGCTCTAGACTACAAGTCCTCTTCAGAAATGAGCTTTTGCTCGCTTCCGCCGCTGATAATCTTGCTTATGG
Forward primer for rps10-WT	GATCCCATCGATTCGAATTCGATGTTGATGCCCAAGAAGAAC
Reverse primer for rps10-WT	GTCGTATGGGTACATCTGTGGCTGCTGTCCTCGG
Forward primer for rps10-K139R mutation	CGGTGCAGACCGCAAGGCTGAGGCTGGTGCAGG
Reverse primer for rps10-K139R mutation	CCTCAGCCTTGCGGTCTGCACCGGGCTGAGCTG
Forward primer for rps10-K140R mutation	TGCAGACAAGCGCGCTGAGGCTGGTGCAGGTGC
Reverse primer for rps10-K140R mutation	CAGCCTCAGCGCGCTTGTCTGCACCGGGCTGAG
Forward primer for rps10-K139/140R mutation	CGGTGCAGACCGCCGCGCTGAGGCTGGTGCAGGTGC
Reverse primer for rps10-K139/140R mutation	CAGCCTCAGCGCGGCGGTCTGCACCGGGCTGAGCTG
Forward primer for rps20	CCGGAATTCAATGGCATTTAAAGACACTGGC
Reverse primer for rps20	CCGCTCGAGTTAGGCGTAGTCGGGCACGTCGTAGGGATAAGCATCTGCAATTGTGACCTC
Forward primer for rps3	GATCCCATCGATTCGAATTCAAGATGGCGGTGCAAATCTC
Reverse primer for rps3	GTCGTATGGGTACATTGCTGTGGGCACTGGGG
Forward primer for rps2	GGATCCCATCGATTCCTCGAGCAAATGGCGGACGACGCCGGTGGTA
Reverse primer for rps2	GTCGTATGGGTACATGGAGGTTCCCTGAGGAAGAGC
