# Supplementary material
Source: HighWire-hosted journal article supplement (doi:10.1101/rna.079633.123)
Supplement: Supplemental_Table_S3.xlsx [file Supplemental_Table_S3.xlsx]

## Sheet: Sheet1
Supplemental Table S3. List of plasmids
pCS2+Rpl36-FLAG
pCS2+eTF1b-HA
pCS2+eTF1b-HA-AAQ
pCS2+Znf598-Myc
pCS2+Znf598-Myc-C13/16A
pCS2+Rps10-HA
pCS2+Rps10-HA-K139R
pCS2+Rps10-HA-K140R
pCS2+Rps10-HA-K139/140R
pCS2+Rps20-HA
pCS2+Rps3-HA
pCS2+Rps2-HA
