# Supplementary material
Source: HighWire-hosted journal article supplement (doi:10.1101/rna.079633.123)
Supplement: Supplemental_Table_S4.xlsx [file Supplemental_Table_S4.xlsx]

## Sheet: Sheet1
Supplemental Table S4. List of antibodies
Rabbit polyclonal anti-DDDDK tag (1:10000)	MEDICAL&BIOLOGICAL LABORATORIES CO., LTD	Cat# PM020-7
Mouse monoclonal anti-HA tag (1:10000)	MEDICAL&BIOLOGICAL LABORATORIES CO., LTD	Cat# M180-7
Mouse monoclonal anti-Myc tag (1:10000)	MEDICAL&BIOLOGICAL LABORATORIES CO., LTD	Cat# M192-3
Rabbit monoclonal anti-DDX6 (1:1000)	Cell Signaling	Cat# 8988
Rabblt polyclonal anti-Ef1a (1:1000)	GeneTex	Cat# GTX124538
Rabbit polyclonal anti-PABP1 (1:1000)	Cell Signaling	Cat# 4992
Rabbit polyclonal anti-Rpl7a (1:4000)	GeneTex	Cat# GTX124314
Rabbit polyclonal anti-Rps10 (1:2500)	GeneTex	Cat# GTX127397
Rabbit polyclonal anti-Tubulin (1:10000)	MEDICAL&BIOLOGICAL LABORATORIES CO., LTD	Cat# PM054-7
Goat anti-rabbit secondary HRP-conjugated (1:5000)	MEDICAL&BIOLOGICAL LABORATORIES CO., LTD	Cat# 458
Goat anti-mouse secondary HRP-conjugated (1:5000)	MEDICAL&BIOLOGICAL LABORATORIES CO., LTD	Cat# 330
Ubiquitin mouse mAb (1:20000)	Cell Signaling	Cat#14049
